# Supplementary material for: Functionalized hypercrosslinked polymers with knitted N-heterocyclic carbene–copper complexes as efficient and recyclable catalysts for organic transformations
Source: Royal Society of Chemistry journal article supplement (doi:10.1039/c5cy02260f), 2016-01-01
Supplement: c5cy02260f1.pdf [file c5cy02260f1.pdf]

## Electronic Supporting Information

### Functionalized hypercrosslinked polymers with knitted *N*-heterocyclic carbene–copper complexes as efficient and recyclable catalysts for organic transformations

Zhifang Jia,<sup>a,b</sup> Kewei Wang,<sup>a,b</sup> Tao Li,<sup>a</sup> Bien Tan,<sup>a\*</sup> and Yanlong Gu<sup>\*a,c</sup>

<sup>a</sup> Key laboratory of Material Chemistry for Energy Conversion and Storage, Ministry of Education, School of Chemistry and Chemical Engineering, Huazhong University of Science and Technology, 430074, Wuhan, China. Phone: (0)86-(0)27-87 54 37 32, Fax: (0)86-(0)27-87 54 45 32, E-mail: taoli@hust.edu.cn; klgyl@hust.edu.cn.

<sup>b</sup> Department of Chemistry and Chemical Engineering, Shanxi Datong University, Datong, 037009, People's Republic of China

<sup>c</sup> State Key Laboratory for Oxo Synthesis and Selective Oxidation, Lanzhou Institute of Chemical Physics, Lanzhou, 730000 (P.R. China)

#### Table of contents

|                                                                                 |           |
|---------------------------------------------------------------------------------|-----------|
| <b>1. General remarks</b> .....                                                 | <b>2</b>  |
| <b>2. Synthesis of <i>N,N'</i>-dibenzylbenzimidazolium chloride (NHC)</b> ..... | <b>2</b>  |
| <b>3. General procedure for the synthesis of HCP–NHC</b> .....                  | <b>2</b>  |
| <b>4. Spectroscopic data of compounds</b> .....                                 | <b>2</b>  |
| <b>5. <sup>1</sup>H NMR and <sup>13</sup>C NMR spectra</b> .....                | <b>12</b> |
| <b>6. References</b> .....                                                      | <b>60</b> |

## 1. General remarks

Indole, 2-methylindole, 5-bromoindole and 1,2-dimethylindole were purchased from Energy Chemical Company. Ethyl-indole-2-carboxylate, 2-phenylindole, 1-iododecane, 4-iodoanisole, and 1-(*tert*-butyl)-4-ethynylbenzene were purchased from Alfa Aesar Chemical Company. 6-Methylindole, 5-methoxyindole, 4-nitroindole, 1,3-cyclohexanedione, and 1,3-cyclopentanedione were purchased from Accela ChemBio Co. Ltd. Benzyl chloride, dimedone, benzimidazole, and formaldehyde dimethyl acetal (FDA, 98%) were purchased from Sinopharm Chemical Reagent Co. Ltd. Pyruvic aldehyde, 5-methoxy-7-methylindole, 5-fluoro-2-methylindole, 7-ethyl-1*H*-indole, 4-chloroindole, and 6-bromoindole were purchased from Adamas Reagent Co. Ltd. 6-Nitroindole, 5-methylindole, 7-azaindole, 5-methoxy-1*H*-pyrrolo[3,2-*b*]pyridine, 3,4-(methylenedioxy) phenylglyoxal hydrate, 5-bromo-2-thiopheneglyoxal hydrate, and 4-bromophenylglyoxal hydrate were purchased from BePharm Co. Ltd. 2-Chlorobenzaldehyde, iodoethane, sodium azide, and 1-ethyl-2-phenylindole were purchased from Aladdin Industrial Corporation. <sup>1</sup>H and <sup>13</sup>C NMR spectra were recorded on a Bruker AV-400. IR spectra were recorded on a FT-IR Bruker (EQUINOX 55) using KBr technology. High-resolution mass spectra (HRMS) were obtained on Bruker Compass Data Analysis 4.0.

## 2. Synthesis of *N,N'*-dibenzylbenzimidazolium chloride (NHC)

NHC was synthesized according to a reported procedure.<sup>1</sup> 1-Benzyl-1*H*-benzimidazole (2.08 g, 10.0 mmol) was suspended in toluene (100 mL). Then, benzyl chloride (1.40 mL, 12.0 mmol) was added and the mixture refluxed for 20 h. The solids were filtered and washed with Et<sub>2</sub>O to give target compound as a white solid (1.90 g, 57%). mp: 210–211 °C. <sup>1</sup>H NMR (400 MHz, DMSO, 25 °C): δ = 10.23 (s, 1H), 7.98 (dd, *J*<sub>a</sub> = 3.2 Hz, *J*<sub>b</sub> = 6.4 Hz, 2H), 7.64 (dd, *J*<sub>a</sub> = 3.2 Hz, *J*<sub>b</sub> = 6.4 Hz, 2H), 7.54 (d, *J* = 4.0 Hz, 4H), 7.45–7.38 (m, 6H), 5.81 ppm (s, 4H); <sup>13</sup>C NMR (100 MHz, DMSO, 25 °C): δ = 143.4, 134.5, 131.5, 129.5, 129.2, 128.8, 127.2, 114.6, 50.5 ppm.

## 3. General procedure for the synthesis of HCP–NHC

HCP-NHC was synthesized according to a reported procedure.<sup>2</sup> NHC (2.01g, 6.0 mmol), benzene (1.40 g, 18 mmol), formaldehyde dimethyl acetal (4.10 g, 54 mmol), FeCl<sub>3</sub> (8.75 g, 54 mmol) and 1,2-dichloroethane (40 mL) were used in this polymerization at 80 °C for 24 h.

## 4. Spectroscopic data of the obtained compounds

**5,5-Dimethyl-2-(1-(2-methyl-1*H*-indol-3-yl)-2-oxo-2-phenylethylidene)cyclohexane-1,3-dione (4a):** Red solid; mp: 128–130 °C. <sup>1</sup>H NMR (400 MHz, DMSO, 25 °C): δ = 12.26 (s, 1H), 7.64 (s, 2H), 7.45 (d, *J* = 4.0 Hz, 2H), 7.36 (t, *J* = 7.6 Hz, 1H), 7.27 (t, *J* = 7.6 Hz, 2H), 7.09–7.05 (m, 1H), 6.99 (t, *J* = 8.0 Hz, 1H), 2.62–2.49 (m, 4H), 2.34 (s, 3H), 1.05 ppm (s, 6H); <sup>13</sup>C NMR (100 MHz,

DMSO, 25 °C):  $\delta$  = 197.7, 194.6, 160.8, 157.7, 136.2, 135.8, 144.8, 132.5, 129.4, 128.4, 128.1, 127.2, 126.2, 122.4, 121.1, 120.1, 111.7, 53.2, 51.7, 29.8, 28.2, 28.1, 14.7 ppm; IR (KBr)  $\nu$  = 3339, 2957, 2927, 2870, 1735, 1670, 1601, 1448, 1334, 1243, 1178, 1023, 749, 695  $\text{cm}^{-1}$ ; HRMS (ESI):  $m/z$ : calcd for  $\text{C}_{25}\text{H}_{23}\text{NNaO}_3$ : 408.1576  $[\text{M} + \text{Na}]^+$ ; found: 408.1569.

**5,5-Dimethyl-2-(2-oxo-2-phenyl-1-(2-phenyl-1*H*-indol-3-yl)ethylidene)cyclohexane-1,3-dione (4b)**: Red solid; mp: 240–242 °C.  $^1\text{H}$  NMR (400 MHz, DMSO, 25 °C):  $\delta$  = 12.22 (s, 1H), 7.68 (d,  $J$  = 8.0 Hz, 2H), 7.54 (d,  $J$  = 2.0 Hz, 2H), 7.49–7.35 (m, 7H), 7.22 (d,  $J$  = 8.0 Hz, 1H), 7.16 (t,  $J$  = 8.0 Hz, 1H), 7.05 (t,  $J$  = 8.0 Hz, 1H), 2.58–2.50 (m, 2H), 2.43–2.40 (m, 1H), 2.09–2.00 (m, 1H), 1.02 (s, 3H), 0.89 ppm (s, 3H);  $^{13}\text{C}$  NMR (100 MHz, DMSO, 25 °C):  $\delta$  = 198.3, 195.4, 154.5, 157.2, 144.7, 137.1, 136.6, 133.1, 132.2, 131.8, 129.5, 129.4, 129.0, 128.9, 128.4, 127.2, 123.1, 121.8, 120.5, 112.8, 109.3, 53.3, 52.5, 29.9, 28.9, 28.4 ppm; IR (KBr)  $\nu$  = 3248, 3061, 2956, 1734, 1663, 1447, 1321, 1241, 1026, 753, 698  $\text{cm}^{-1}$ ; HRMS (ESI):  $m/z$ : calcd for  $\text{C}_{30}\text{H}_{25}\text{NNaO}_3$ : 470.1732  $[\text{M} + \text{Na}]^+$ ; found: 470.1727.

**2-(1-(1*H*-Indol-3-yl)-2-oxo-2-phenylethylidene)-5,5-dimethylcyclohexane-1,3-dione (4c)**: Red solid; mp: 206–208 °C.  $^1\text{H}$  NMR (400 MHz, DMSO, 25 °C):  $\delta$  = 12.25 (s, 1H), 7.91 (s, 1H), 7.69 (t,  $J$  = 4.0 Hz, 2H), 7.50–7.44 (m, 2H), 7.39 (t,  $J$  = 8.0 Hz, 2H), 7.19 (t,  $J$  = 8.0 Hz, 2H), 7.13 (t,  $J$  = 8.0 Hz, 1H), 2.83 (s, 1H), 2.55–2.50 (m, 3H), 1.07 ppm (s, 6H);  $^{13}\text{C}$  NMR (100 MHz, DMSO, 25 °C):  $\delta$  = 198.0, 196.5, 195.8, 156.7, 137.7, 136.6, 136.4, 133.1, 129.1, 128.4, 127.0, 124.7, 123.3, 122.1, 122.0, 113.4, 111.3, 53.8, 52.3, 30.5, 28.8, 28.2 ppm; IR (KBr)  $\nu$  = 3307, 2954, 2926, 1652, 1472, 1424, 1369, 1235, 1138, 1024, 1004, 749, 695  $\text{cm}^{-1}$ ; HRMS (ESI):  $m/z$ : calcd for  $\text{C}_{24}\text{H}_{21}\text{NNaO}_3$ : 394.1419  $[\text{M} + \text{Na}]^+$ ; found: 394.1410.

**Ethyl 3-(1-(4,4-dimethyl-2,6-dioxocyclohexylidene)-2-oxo-2-phenylethyl)-1*H*-indole-2-carboxylate (4d)**: Red solid; mp: 178–179 °C.  $^1\text{H}$  NMR (400 MHz,  $\text{CDCl}_3$ , 25 °C, TMS):  $\delta$  = 9.65 (s, 1H), 8.07 (t,  $J$  = 4.0 Hz, 2H), 7.91 (d,  $J$  = 8.0 Hz, 1H), 7.40 (t,  $J$  = 8.0 Hz, 1H), 7.30 (t,  $J$  = 7.6 Hz, 2H), 7.19 (d,  $J$  = 4.0 Hz, 2H), 7.15–7.09 (m, 1H), 4.29–4.18 (m, 2H), 2.71 (d,  $J$  = 16.0 Hz, 1H), 2.60–2.54 (m, 3H), 1.29 (t,  $J$  = 8.0 Hz, 3H), 1.13 (s, 3H), 1.09 ppm (s, 3H);  $^{13}\text{C}$  NMR (100 MHz,  $\text{CDCl}_3$ , 25 °C):  $\delta$  = 198.4, 196.3, 194.4, 161.0, 154.9, 136.0, 135.4, 135.2, 133.1, 129.0, 128.4, 126.7, 126.2, 125.6, 123.0, 122.1, 112.9, 112.1, 61.33, 53.9, 53.4, 30.0, 28.7, 28.6, 14.2 ppm; IR (KBr)  $\nu$  = 3327, 2958, 1709, 1669, 1531, 1431, 1376, 1326, 1244, 1102, 749, 695  $\text{cm}^{-1}$ ; HRMS (ESI):  $m/z$ : calcd for  $\text{C}_{27}\text{H}_{25}\text{NNaO}_5$ : 466.1630  $[\text{M} + \text{Na}]^+$ ; found: 466.1623.

**2-(1-(6-Methoxy-4-methyl-1*H*-indol-3-yl)-2-oxo-2-phenylethylidene)-5,5-dimethylcyclohexane-1,3-dione (4e)**: Red solid; mp: 251–252 °C.  $^1\text{H}$  NMR (400 MHz, DMSO, 25 °C):  $\delta$  = 12.17 (s, 1H), 7.67 (d,  $J$  = 8.0 Hz, 2H), 7.47 (t,  $J$  = 8.0 Hz, 1H), 7.40–7.37 (m, 2H), 7.20 (d,  $J$  = 8.0 Hz, 1H), 6.72 (dd,  $J_a$  = 4.0 Hz,  $J_b$  = 8.0 Hz, 1H), 3.63 (s, 3H), 2.55–2.50 (m, 4H), 2.30 (s, 3H), 1.07 ppm (s, 6H);  $^{13}\text{C}$  NMR (100 MHz, DMSO, 25 °C):  $\delta$  = 197.8, 195.0, 157.6,

155.0, 136.4, 132.5, 130.6, 128.5, 128.0, 127.1, 126.3, 112.3, 111.2, 103.5, 55.1, 29.8, 28.1, 14.8 ppm; IR (KBr)  $\nu$  = 3249, 2954, 1663, 1633, 1432, 1334, 1261, 1201, 1026, 1007, 811, 697  $\text{cm}^{-1}$ ; HRMS (ESI):  $m/z$ : calcd for  $\text{C}_{26}\text{H}_{25}\text{NNaO}_4$ : 438.1681  $[\text{M} + \text{Na}]^+$ ; found: 438.1675.

**2-(1-(2,5-Dimethyl-1*H*-indol-3-yl)-2-oxo-2-phenylethylidene)-5,5-dimethylcyclohexane-1,3-dione (4f)**: Red solid; mp: 179–181 °C.  $^1\text{H}$  NMR (400 MHz, DMSO, 25 °C):  $\delta$  = 12.15 (s, 1H), 7.65 (d,  $J$  = 2.0 Hz, 2H), 7.47–7.44 (m, 1H), 7.37 (t,  $J$  = 8.0 Hz, 1H), 7.18 (d,  $J$  = 8.0 Hz, 1H), 7.04 (s, 1H), 6.90 (d,  $J$  = 8.0 Hz, 1H), 2.55–2.50 (m, 4H), 2.31 (s, 3H), 2.26 (s, 3H), 1.07 ppm (s, 6H);  $^{13}\text{C}$  NMR (100 MHz, DMSO, 25 °C):  $\delta$  = 197.9, 195.2, 158.3, 136.8, 134.5, 132.9, 130.7, 128.9, 128.5, 127.3, 127.0, 124.2, 120.7, 111.8, 53.5, 52.3, 30.3, 28.6, 21.9, 15.2 ppm; IR (KBr)  $\nu$  = 3228, 2955, 2869, 1663, 1638, 1436, 1332, 1247, 1024, 1004, 759, 696  $\text{cm}^{-1}$ ; HRMS (ESI):  $m/z$ : calcd for  $\text{C}_{26}\text{H}_{25}\text{NNaO}_3$ : 422.1732  $[\text{M} + \text{Na}]^+$ ; found: 422.1724.

**2-(1-(5-Fluoro-2-methyl-1*H*-indol-3-yl)-2-oxo-2-phenylethylidene)-5,5-dimethylcyclohexane-1,3-dione (4g)**: Red solid; mp: 202–203 °C.  $^1\text{H}$  NMR (400 MHz, DMSO, 25 °C):  $\delta$  = 12.27 (s, 1H), 7.66 (d,  $J$  = 4.0 Hz, 2H), 7.47 (t,  $J$  = 7.6 Hz, 1H), 7.38 (t,  $J$  = 8.0 Hz, 2H), 7.30 (dd,  $J_a$  = 4.0 Hz,  $J_b$  = 8.0 Hz, 1H), 6.95–6.92 (m, 2H), 2.58 (s, 4H), 2.34 (s, 3H), 1.06 ppm (s, 6H);  $^{13}\text{C}$  NMR (100 MHz, DMSO, 25 °C):  $\delta$  = 197.0, 194.8, 159.6, 157.3, 136.4, 133.1, 132.8, 129.0, 128.5, 128.2, 127.4 (d,  $J$  = 10.0 Hz), 113.15 (d,  $J$  = 5.0 Hz), 110.6, 110.3, 106.0, 105.7, 53.4, 30.2, 28.5, 15.1 ppm;  $^{19}\text{F}$  NMR (377 MHz, DMSO, 25 °C):  $\delta$  = -121.4 ppm (s, 1F); IR (KBr)  $\nu$  = 2956, 2871, 1660, 1441, 1334, 1251, 1183, 1025, 1006  $\text{cm}^{-1}$ ; HRMS (ESI)  $m/z$ : calcd for  $\text{C}_{25}\text{H}_{22}\text{FNNaO}_3$ : 426.1481  $[\text{M} + \text{Na}]^+$ ; found: 426.1484.

**5,5-Dimethyl-2-(1-(1-methyl-2-phenyl-1*H*-indol-3-yl)-2-oxo-2-phenylethylidene)cyclohexane-1,3-dione (4h)**: Red solid; mp: 113–115 °C.  $^1\text{H}$  NMR (400 MHz, DMSO, 25 °C):  $\delta$  = 7.60 (d,  $J$  = 4.0 Hz, 2H), 7.54 (d,  $J$  = 8.0 Hz, 1H), 7.50–7.43 (m, 4H), 7.35 (t,  $J$  = 8.0 Hz, 2H), 7.29–7.23 (m, 4H), 7.12 (d,  $J$  = 7.6 Hz, 1H), 3.52 (s, 3H), 2.55–2.46 (m, 2H), 2.31–2.24 (m, 1H), 2.03–1.98 (m, 1H), 0.98 (s, 3H), 0.81 ppm (s, 3H);  $^{13}\text{C}$  NMR (100 MHz, DMSO, 25 °C):  $\delta$  = 197.8, 195.9, 194.5, 156.8, 145.7, 138.0, 136.5, 133.1, 131.4, 130.5, 129.6, 128.9, 128.8, 128.3, 126.1, 123.2, 122.2, 120.6, 111.7, 110.1, 53.4, 52.4, 31.8, 29.8, 28.8, 28.4 ppm; IR (KBr)  $\nu$  = 3058, 2954, 2870, 1734, 1666, 1466, 1394, 1367, 1249, 1056, 1028, 749, 699  $\text{cm}^{-1}$ ; HRMS (ESI):  $m/z$ : calcd for  $\text{C}_{31}\text{H}_{27}\text{NNaO}_3$ : 484.1889  $[\text{M} + \text{Na}]^+$ ; found: 484.1891.

**2-(1-(1-Ethyl-2-phenyl-1*H*-indol-3-yl)-2-oxo-2-phenylethylidene)-5,5-dimethylcyclohexane-1,3-dione (4i)**: Red solid; mp: 167–168 °C.  $^1\text{H}$  NMR (400 MHz, DMSO, 25 °C):  $\delta$  = 7.60 (t,  $J$  = 8.0 Hz, 3H), 7.49 (t,  $J$  = 7.6 Hz, 1H), 7.34–7.33 (m, 3H), 7.37 (t,  $J$  = 8.0 Hz, 2H), 7.26–7.22 (m, 4H), 7.11 (t,  $J$  = 8.0 Hz, 1H), 4.06–3.98 (m, 2H), 2.59–2.46 (m, 2H), 2.29–2.25 (m, 1H), 2.04 (s, 1H), 1.08 (t,  $J$  = 8.0 Hz, 3H), 0.98 (s, 3H), 0.78 (s, 3H) ppm;  $^{13}\text{C}$  NMR (100 MHz, DMSO, 25 °C):  $\delta$  = 197.7, 196.0, 194.7, 156.7, 145.1, 136.7, 136.4, 133.1, 131.2, 130.6, 129.7, 129.0, 128.9, 128.3,

126.3, 123.3, 122.2, 120.8, 111.8, 111.5, 53.4, 52.3, 39.3, 29.7, 28.8, 28.3, 15.3 ppm; IR (KBr)  $\nu$  = 3445, 3059, 2956, 1734, 1665, 1462, 1407, 1356, 1232, 1055, 1027, 761, 699  $\text{cm}^{-1}$ ; HRMS (ESI):  $m/z$ : calcd for  $\text{C}_{32}\text{H}_{29}\text{NO}_3$ : 498.2045  $[\text{M} + \text{Na}]^+$ ; found: 498.2040.

**2-(1-(4-Ethyl-1*H*-indol-3-yl)-2-oxo-2-phenylethylidene)-5,5-dimethylcyclohexane-1,3-dione**

**(4j)**: Red solid; mp: 123–125 °C.  $^1\text{H}$  NMR (400 MHz, DMSO, 25 °C):  $\delta$  = 12.27 (s, 1H), 7.86 (s, 1H), 7.70 (d,  $J$  = 8.0 Hz, 2H), 7.48 (t,  $J$  = 8.0 Hz, 1H), 7.38 (t,  $J$  = 7.6 Hz, 2H), 7.07–7.04 (m, 2H), 7.10–7.03 (m, 1H), 2.84 (quint,  $J$  = 8.0 Hz, 2H), 2.58–2.50 (m, 4H), 1.23 (t,  $J$  = 8.0 Hz, 3H), 1.07 ppm (s, 6H);  $^{13}\text{C}$  NMR (100 MHz, DMSO, 25 °C):  $\delta$  = 194.8, 156.6, 136.4, 135.9, 133.1, 129.1, 129.0, 128.4, 127.2, 124.7, 122.2, 119.8, 111.6, 53.8, 52.3, 30.5, 28.6, 23.9, 15.0 ppm; IR (KBr)  $\nu$  = 3162, 3102, 2959, 2873, 1657, 1488, 1427, 1368, 1229, 1144, 1052, 1026, 1005, 752, 698  $\text{cm}^{-1}$ ; HRMS (ESI):  $m/z$ : calcd for  $\text{C}_{26}\text{H}_{25}\text{NNaO}_3$ : 422.1732  $[\text{M} + \text{Na}]^+$ ; found: 422.1728.

**5,5-Dimethyl-2-(1-(5-methyl-1*H*-indol-3-yl)-2-oxo-2-phenylethylidene)cyclohexane-1,3-dione**

**(4k)**: Red solid; mp: 212–213 °C.  $^1\text{H}$  NMR (400 MHz,  $\text{CDCl}_3$ , 25 °C, TMS):  $\delta$  = 9.98 (s, 1H), 7.73 (d,  $J$  = 8.0 Hz, 2H), 7.38 (t,  $J$  = 6.8 Hz, 1H), 7.30–7.25 (m, 3H), 6.94 (d,  $J$  = 8.0 Hz, 1H), 6.90–6.86 (m, 2H), 2.68 (d,  $J$  = 16.0 Hz, 2H), 2.49 (s, 2H), 2.37 (s, 3H), 1.15 ppm (d,  $J$  = 8.0 Hz, 6H);  $^{13}\text{C}$  NMR (100 MHz,  $\text{CDCl}_3$ , 25 °C):  $\delta$  = 197.6, 196.6, 195.7, 159.0, 136.9, 136.5, 135.7, 132.7, 131.8, 128.6, 128.4, 125.4, 125.2, 124.2, 122.3, 112.7, 112.4, 54.1, 52.5, 30.4, 28.7, 21.9 ppm; IR (KBr)  $\nu$  = 3296, 2956, 1734, 1648, 1421, 1366, 1238, 1139, 802, 694  $\text{cm}^{-1}$ ; HRMS (ESI):  $m/z$ : calcd for  $\text{C}_{25}\text{H}_{23}\text{NNaO}_3$ : 408.1576  $[\text{M} + \text{Na}]^+$ ; found: 408.1577.

**2-(1-(5-Methoxy-1*H*-indol-3-yl)-2-oxo-2-phenylethylidene)-5,5-dimethylcyclohexane-1,3-dione**

**(4l)**: Red solid; mp: 145–147 °C.  $^1\text{H}$  NMR (400 MHz,  $\text{CDCl}_3$ , 25 °C, TMS):  $\delta$  = 10.08 (s, 1H), 7.75 (d,  $J$  = 8.0 Hz, 2H), 7.42–7.38 (m, 2H), 7.31–7.28 (m, 2H), 6.95 (d,  $J$  = 8.0 Hz, 1H), 6.70 (d,  $J$  = 12.0 Hz, 1H), 6.52 (s, 1H), 3.73 (s, 3H), 2.67 (s, 2H), 2.49 (s, 2H), 1.14 ppm (s, 6H);  $^{13}\text{C}$  NMR (100 MHz,  $\text{CDCl}_3$ , 25 °C):  $\delta$  = 197.7, 196.4, 195.9, 159.0, 155.9, 137.5, 136.5, 132.8, 132.1, 128.6, 128.3, 125.1, 113.7, 112.9, 112.7, 105.4, 55.6, 54.1, 52.4, 30.3, 28.7 ppm; IR (KBr)  $\nu$  = 3305, 2955, 1735, 1663, 1633, 1466, 1367, 1247, 1204, 1140, 1039, 803, 695  $\text{cm}^{-1}$ ; HRMS (ESI):  $m/z$ : calcd for  $\text{C}_{25}\text{H}_{23}\text{NNaO}_4$ : 424.1525  $[\text{M} + \text{Na}]^+$ ; found: 424.1517.

**2-(1-(5-Fluoro-1*H*-indol-3-yl)-2-oxo-2-phenylethylidene)-5,5-dimethylcyclohexane-1,3-dione**

**(4m)**: Red solid; mp: 120–122 °C.  $^1\text{H}$  NMR (400 MHz,  $\text{CDCl}_3$ , 25 °C, TMS):  $\delta$  = 10.99 (d,  $J$  = 12.0 Hz, 1H), 7.74 (d,  $J$  = 8.0 Hz, 2H), 7.56 (s, 1H), 7.41 (t,  $J$  = 7.6 Hz, 1H), 7.30 (t,  $J$  = 8.0 Hz, 2H), 7.09–7.06 (m, 1H), 6.910–6.86 (m, 1H), 2.70 (s, 2H), 2.51 (s, 2H), 1.15 ppm (s, 6H);  $^{13}\text{C}$  NMR (100 MHz,  $\text{CDCl}_3$ , 25 °C):  $\delta$  = 197.9, 196.9, 195.7, 161.3, 158.9, 158.1, 137.4, 136.2, 133.0, 128.7, 128.3, 122.7 (d,  $J$  = 11.0 Hz), 120.5, 112.0, 110.7 (d,  $J$  = 24.0 Hz), 99.4, 99.1, 54.2, 52.6, 30.4, 28.6 ppm.  $^{19}\text{F}$  NMR (377 MHz,  $\text{CDCl}_3$ , 25 °C):  $\delta$  = -118.4 ppm (sext,  $J$  = 6.4 Hz, 1F); IR (KBr)  $\nu$  = 3301, 3067, 2960, 1732, 1671, 1622, 1524, 1450, 1375, 1242, 1141, 1043, 955, 844,

694  $\text{cm}^{-1}$ ; HRMS (ESI):  $m/z$ : calcd for  $\text{C}_{24}\text{H}_{20}\text{FNNaO}_3$ : 412.1325  $[\text{M} + \text{Na}]^+$ ; found: 412.1320.

**2-(1-(6-Methoxy-4-methyl-1*H*-indol-3-yl)-2-oxo-2-phenylethylidene)-5,5-**

**dimethylcyclohexane-1,3-dione (4n):** Red solid; mp: 125–126 °C.  $^1\text{H}$  NMR (400 MHz,  $\text{CDCl}_3$ , 25 °C, TMS):  $\delta$  = 10.04 (s, 1H), 7.70 (d,  $J$  = 8.0 Hz, 2H), 7.37 (t,  $J$  = 8.0 Hz, 1H), 7.27 (t,  $J$  = 8.0 Hz, 3H), 6.58 (s, 1H), 6.36 (s, 1H), 3.75 (s, 3H), 2.71–2.60 (m, 2H), 2.50 (s, 2H), 2.12 (s, 3H), 1.15 ppm (d,  $J$  = 8.0 Hz, 6H);  $^{13}\text{C}$  NMR (100 MHz,  $\text{CDCl}_3$ , 25 °C):  $\delta$  = 197.3, 196.8, 195.4, 159.4, 156.0, 136.9, 136.4, 132.7, 132.0, 128.6, 128.3, 125.1, 124.4, 123.8, 113.7, 113.1, 102.8, 55.6, 54.1, 52.4, 30.4, 28.5, 16.2 ppm; IR (KBr)  $\nu$  = 3297, 2953, 1732, 1664, 1640, 1465, 1427, 1366, 1211, 1136, 1047, 844, 800, 697  $\text{cm}^{-1}$ ; HRMS (ESI):  $m/z$ : calcd for  $\text{C}_{26}\text{H}_{25}\text{NNaO}_4$ : 438.1681  $[\text{M} + \text{Na}]^+$ ; found: 438.1676.

**5,5-Dimethyl-2-(1-(6-nitro-1*H*-indol-3-yl)-2-oxo-2-phenylethylidene)cyclohexane-1,3-dione**

**(4o):** Red solid; mp: 125–126 °C.  $^1\text{H}$  NMR (400 MHz,  $\text{CDCl}_3$ , 25 °C, TMS):  $\delta$  = 10.39 (s, 1H), 8.00–7.94 (m, 2H), 7.90 (d,  $J$  = 3.2 Hz, 1H), 7.76 (d,  $J$  = 8.0 Hz, 2H), 7.43 (t,  $J$  = 8.0 Hz, 1H), 7.32 (t,  $J$  = 8.0 Hz, 2H), 7.27 (d,  $J$  = 2.0 Hz, 1H), 2.76 (s, 2H), 2.60 (s, 2H), 1.18 ppm (s, 6H);  $^{13}\text{C}$  NMR (100 MHz,  $\text{CDCl}_3$ , 25 °C):  $\delta$  = 198.2, 197.2, 195.6, 156.4, 143.6, 138.4, 135.6, 133.4, 128.8, 128.4, 121.4, 117.0, 111.4, 109.2, 54.3, 53.8, 31.0, 30.4, 28.6  $\text{cm}^{-1}$ ; IR (KBr)  $\nu$  = 3329, 2958, 2929, 1734, 1664, 1512, 1448, 1339, 1241, 1115, 1044, 699  $\text{cm}^{-1}$ ; HRMS (ESI):  $m/z$ : calcd for  $\text{C}_{24}\text{H}_{20}\text{N}_2\text{NaO}_5$ : 439.1270  $[\text{M} + \text{Na}]^+$ ; found: 439.1259.

**2-(1-(4-Hydroxy-1*H*-indol-3-yl)-2-oxo-2-phenylethylidene)-5,5-dimethylcyclohexane-1,3-**

**dione (4p):** Red solid; mp: 147–149 °C.  $^1\text{H}$  NMR (400 MHz, DMSO, 25 °C):  $\delta$  = 11.74 (s, 1H), 9.80 (s, 1H), 7.80 (d,  $J$  = 8.0 Hz, 2H), 7.48 (t,  $J$  = 7.6 Hz, 1H), 7.40 (t,  $J$  = 8.0 Hz, 2H), 7.29 (d,  $J$  = 4.0 Hz, 1H), 7.00 (t,  $J$  = 8.0 Hz, 1H), 6.88 (d,  $J$  = 8.0 Hz, 1H), 6.52 (d,  $J$  = 8.0 Hz, 1H), 2.72 (s, 1H), 2.43 (s, 3H), 1.11 ppm (s, 6H);  $^{13}\text{C}$  NMR (100 MHz, DMSO, 25 °C):  $\delta$  = 197.0, 195.5, 156.1, 151.8, 139.7, 136.1, 133.0, 131.3, 129.0, 128.5, 124.5, 113.6, 107.3, 104.4, 53.1, 52.5, 30.2, 28.9 ppm; IR (KBr)  $\nu$  = 3301, 2954, 2871, 1658, 1594, 1526, 1494, 1451, 1426, 1307, 1241, 1130, 1024, 782, 744, 700  $\text{cm}^{-1}$ ; HRMS (ESI):  $m/z$ : calcd for  $\text{C}_{24}\text{H}_{21}\text{NNaO}_4$ : 410.1368  $[\text{M} + \text{Na}]^+$ ; found: 410.1362.

**2-(1-(5-Methoxy-1*H*-pyrrolo[3,2-*b*]pyridin-3-yl)-2-oxo-2-phenylethylidene)-5,5-**

**dimethylcyclohexane-1,3-dione (4q):** Red solid; mp: 122–124 °C.  $^1\text{H}$  NMR (400 MHz,  $\text{CDCl}_3$ , 25 °C, TMS):  $\delta$  = 9.96 (s, 1H), 7.82 (d,  $J$  = 8.0 Hz, 2H), 7.45–7.41 (m, 2H), 7.32 (t,  $J$  = 7.6 Hz, 2H), 7.24 (d,  $J$  = 8.0 Hz, 1H), 6.43 (d,  $J$  = 8.0 Hz, 1H), 3.72 (s, 3H), 2.84–2.68 (m, 2H), 2.48 (s, 2H), 1.16–1.10 ppm (m, 6H);  $^{13}\text{C}$  NMR (100 MHz,  $\text{CDCl}_3$ ):  $\delta$  = 198.0, 197.5, 196.1, 160.5, 154.6, 139.2, 136.2, 134.3, 132.8, 129.9, 128.6, 125.9, 123.1, 111.3, 106.9, 54.3, 53.4, 53.0, 31.6, 30.4, 29.1 ppm; IR (KBr)  $\nu$  = 3269, 2955, 2927, 2870, 1652, 1583, 1452, 1407, 1296, 1241, 1145, 1024, 938, 813, 694, 667, 582  $\text{cm}^{-1}$ ; HRMS (ESI):  $m/z$ : calcd for  $\text{C}_{24}\text{H}_{22}\text{N}_2\text{NaO}_4$ : 425.1477  $[\text{M} + \text{Na}]^+$ ;

found: 425.1474.

**2-(2-Cyclopropyl-1-(2-methyl-1*H*-indol-3-yl)-2-oxoethylidene)-5,5-dimethylcyclohexane-1,3-dione (4r):** Orange solid; mp: 123–125 °C. <sup>1</sup>H NMR (400 MHz, DMSO, 25 °C):  $\delta$  = 12.22 (s, 1H), 7.35 (d, *J* = 8.0 Hz, 1H), 7.19 (d, *J* = 8.0 Hz, 1H), 7.13 (t, *J* = 8.0 Hz, 1H), 7.06 (t, *J* = 7.6 Hz, 1H), 2.55–2.50 (m, 4H), 2.27 (s, 3H), 2.01–1.93 (m, 1H), 1.05–0.98 (m, 8H), 0.86–0.81 ppm (m, 2H); <sup>13</sup>C NMR (100 MHz, DMSO, 25 °C):  $\delta$  = 205.8, 195.3, 147.8, 136.2, 127.2, 122.8, 121.6, 120.3, 111.2, 109.4, 53.7, 52.4, 32.2, 30.1, 28.9, 14.8 ppm; IR (KBr)  $\nu$  = 3323, 2959, 2930, 1729, 1675, 1627, 1456, 1373, 1334, 1242, 1051, 1025, 746 cm<sup>-1</sup>; HRMS (ESI): *m/z*: calcd for C<sub>22</sub>H<sub>23</sub>NNaO<sub>3</sub>: 372.1576 [M + Na]<sup>+</sup>; found: 372.1572.

**5,5-Dimethyl-2-(1-(2-methyl-1*H*-indol-3-yl)-2-oxopropylidene)cyclohexane-1,3-dione (4s):** Red solid; mp: 147–149 °C. <sup>1</sup>H NMR (400 MHz, DMSO, 25 °C):  $\delta$  = 12.29 (s, 1H), 7.38 (d, *J* = 8.0 Hz, 1H), 7.23 (d, *J* = 8.0 Hz, 2H), 7.16 (t, *J* = 8.0 Hz, 1H), 7.07 (t, *J* = 7.6 Hz, 1H), 2.54–2.50 (m, 4H), 2.25 (s, 3H), 2.15 (s, 3H), 1.05 ppm (s, 3H); <sup>13</sup>C NMR (100 MHz, DMSO, 25 °C):  $\delta$  = 203.2, 160.0, 148.2, 136.3, 128.7, 128.2, 126.7, 123.0, 122.0, 120.1, 112.2, 109.0, 56.3, 31.2, 30.2, 30.0, 28.6, 14.9 ppm; IR (KBr)  $\nu$  = 3298, 2961, 2922, 1720, 1673, 1603, 1460, 1261, 1197, 1023, 804, 749, 537 cm<sup>-1</sup>; HRMS (ESI): *m/z*: calcd for C<sub>20</sub>H<sub>21</sub>NNaO<sub>3</sub>: 346.1419 [M + Na]<sup>+</sup>; found: 346.1412.

**2-(2-(4-Bromophenyl)-1-(2-methyl-1*H*-indol-3-yl)-2-oxoethylidene)-5,5-dimethylcyclohexane-1,3-dione (4t):** Red solid; mp: 185–186 °C. <sup>1</sup>H NMR (400 MHz, DMSO, 25 °C):  $\delta$  = 12.34 (s, 1H), 7.57 (s, 4H), 7.31 (d, *J* = 8.0 Hz, 2H), 7.09 (t, *J* = 8.0 Hz, 1H), 7.01 (t, *J* = 7.6 Hz, 1H), 2.60–2.50 (m, 4H), 2.34 (s, 3H), 1.06 ppm (s, 6H); <sup>13</sup>C NMR (100 MHz, DMSO, 25 °C):  $\delta$  = 197.9, 194.4, 193.7, 156.9, 156.8, 135.8, 135.3, 131.6, 129.9, 127.0, 126.5, 126.1, 122.5, 121.5, 120.0, 111.7, 53.1, 51.5, 29.8, 28.0, 14.1 ppm; IR (KBr)  $\nu$  = 3180, 2955, 1667, 1639, 1585, 1439, 1332, 1243, 1174, 1005, 802, 751 cm<sup>-1</sup>; HRMS (ESI): *m/z*: calcd for C<sub>25</sub>H<sub>22</sub>BrNNaO<sub>3</sub>: 486.0681 [M + Na]<sup>+</sup>; found: 486.0672.

**2-(2-(Benzo[*d*][1,3]dioxol-5-yl)-1-(2-methyl-1*H*-indol-3-yl)-2-oxoethylidene)-5,5-dimethylcyclohexane-1,3-dione (4u):** Red solid; mp: 126–128 °C. <sup>1</sup>H NMR (400 MHz, DMSO, 25 °C):  $\delta$  = 12.25 (s, 1H), 7.30 (d, *J* = 8.0 Hz, 1H), 7.16–7.06 (m, 4H), 6.99 (t, *J* = 7.6 Hz, 1H), 6.86 (t, *J* = 7.6 Hz, 1H), 6.04 (s, 2H), 2.50 (s, 4H), 2.32 (s, 3H), 1.05 ppm (s, 6H); <sup>13</sup>C NMR (100 MHz, DMSO, 25 °C):  $\delta$  = 195.0, 159.7, 151.6, 148.1, 136.1, 131.8, 128.3, 127.9, 126.4, 125.0, 123.3, 122.4, 121.0, 112.0, 108.1, 108.0, 101.8, 53.7, 52.6, 30.1, 29.0, 28.4, 14.8 ppm; IR (KBr)  $\nu$  = 3274, 2955, 2924, 1736, 1702, 1615, 1544, 1458, 1423, 1331, 1226, 1103, 1044, 981, 746 cm<sup>-1</sup>; HRMS (ESI): *m/z*: calcd for C<sub>26</sub>H<sub>23</sub>NNaO<sub>5</sub>: 452.1474 [M + Na]<sup>+</sup>; found: 452.1470.

**2-(2-(Benzofuran-2-yl)-1-(2-methyl-1*H*-indol-3-yl)-2-oxoethylidene)-5,5-dimethylcyclohexane-1,3-dione (4v):** Red solid; mp: 128–130 °C. <sup>1</sup>H NMR (400 MHz, DMSO,

25 °C):  $\delta$  = 12.38 (s, 1H), 7.71 (d,  $J$  = 8.0 Hz, 1H), 7.63 (d,  $J$  = 8.0 Hz, 1H), 7.49–7.46 (m, 1H), 7.34–7.28 (m, 3H), 7.22–7.15 (m, 1H), 7.09 (t,  $J$  = 8.0 Hz, 1H), 6.99 (t,  $J$  = 8.0 Hz, 1H), 2.62 (s, 2H), 2.52–2.50 (m, 2H), 2.35 (s, 3H), 1.07 ppm (s, 6H);  $^{13}\text{C}$  NMR (100 MHz, DMSO, 25 °C):  $\delta$  = 198.7, 194.8, 185.5, 155.1, 152.8, 136.3, 128.6, 127.2, 127.0, 124.5, 124.0, 123.1, 122.1, 120.4, 113.0, 112.6, 112.3, 53.6, 52.3, 52.2, 30.2, 29.5, 28.5, 15.2 ppm; IR (KBr)  $\nu$  = 2955, 2923, 2853, 1661, 1556, 1444, 1332, 1240, 1022, 1006, 816, 750  $\text{cm}^{-1}$ ; HRMS (ESI):  $m/z$ : calcd for  $\text{C}_{27}\text{H}_{23}\text{NNaO}_4$ : 448.1525  $[\text{M} + \text{Na}]^+$ ; found: 448.1522.

**2-(2-(5-Bromothiophen-2-yl)-1-(2-methyl-1H-indol-3-yl)-2-oxoethylidene)-5,5-**

**dimethylcyclohexane-1,3-dione (4w):** Red solid; mp: 123–125 °C.  $^1\text{H}$  NMR (400 MHz, DMSO, 25 °C):  $\delta$  = 12.39 (s, 1H), 7.34 (d,  $J$  = 8.0 Hz, 1H), 7.19 (d,  $J$  = 4.0 Hz, 2H), 7.13–7.10 (m, 2H), 7.02 (t,  $J$  = 8.0 Hz, 1H), 2.61–2.58 (m, 2H), 2.52–2.50 (m, 2H), 2.31 (s, 3H), 1.05 ppm (s, 6H);  $^{13}\text{C}$  NMR (100 MHz,  $\text{CDCl}_3$ , 25 °C):  $\delta$  = 198.7, 183.6, 156.5, 149.2, 145.2, 143.9, 136.0, 132.4, 131.2, 128.0, 126.5, 123.6, 122.6, 120.9, 111.9, 53.7, 52.7, 30.1, 29.1, 28.2, 14.7 ppm; IR (KBr)  $\nu$  = 3284, 2964, 2927, 1663, 1432, 1330, 1248, 1104, 1025, 748, 694  $\text{cm}^{-1}$ ; HRMS (ESI):  $m/z$ : calcd for  $\text{C}_{23}\text{H}_{20}\text{BrNNaO}_3\text{S}$ : 492.0245  $[\text{M} + \text{Na}]^+$ ; found: 492.0239.

**2-(1-(2-Methyl-1H-indol-3-yl)-2-oxo-2-phenylethylidene)cycloheptane-1,3-dione (4x):** Red solid; mp: 70–72 °C.  $^1\text{H}$  NMR (400 MHz,  $\text{CDCl}_3$ , 25 °C, TMS):  $\delta$  = 8.73 (d,  $J$  = 12.0 Hz 1H), 7.83 (d,  $J$  = 4.0 Hz, 2H), 7.41 (t,  $J$  = 8.0 Hz, 1H), 7.32–7.29 (m, 3H), 7.12–7.06 (m, 3H), 2.76–2.73 (m, 2H), 2.63–2.60 (m, 2H), 2.06–2.05 (m, 5H), 2.02–1.98 ppm (m, 2H);  $^{13}\text{C}$  NMR (100 MHz,  $\text{CDCl}_3$ , 25 °C):  $\delta$  = 204.4, 200.0, 195.6, 151.1, 137.5, 136.2, 135.6, 135.3, 132.9, 128.7, 128.5, 126.2, 122.2, 120.9, 119.0, 111.2, 107.2, 43.0, 41.7, 24.8, 24.2, 13.5 ppm; IR (KBr)  $\nu$  = 3336, 2930, 2864, 1665, 1596, 1453, 1251, 1130, 1044, 1009, 842, 747  $\text{cm}^{-1}$ ; HRMS (ESI):  $m/z$ : calcd for  $\text{C}_{24}\text{H}_{21}\text{NNaO}_3$ : 394.1419  $[\text{M} + \text{Na}]^+$ ; found: 394.1414.

**4,4-Dimethyl-2-(1-(2-methyl-1H-indol-3-yl)-2-oxo-2-phenylethylidene)cyclohexane-1,3-dione (4y):** Red solid (*Z/E* isomer mixture); mp: 127–129 °C.  $^1\text{H}$  NMR (400 MHz, DMSO, 25 °C):  $\delta$  = 12.21 (s, 1H), 7.66 (d,  $J$  = 4.0 Hz, 2H), 7.45 (t,  $J$  = 8.0 Hz, 1H), 7.37 (t,  $J$  = 8.0 Hz, 2H), 7.30 (t,  $J$  = 8.0 Hz, 1H), 7.22 (s, 1H), 7.07 (t,  $J$  = 8.0 Hz, 1H), 6.99 (t,  $J$  = 8.0 Hz, 1H), 2.68 (t,  $J$  = 7.6 Hz, 1H), 2.58 (s, 1H), 2.35 (s, 3H), 1.89 (t,  $J$  = 7.6 Hz, 2H), 1.25–1.22 (m, 3H), 1.07 ppm (s, 3H);  $^{13}\text{C}$  NMR (100 MHz,  $\text{CDCl}_3$ , 25 °C):  $\delta$  = 202.7, 198.4, 195.5, 158.8, 146.8, 136.7, 136.3, 133.0, 128.9, 128.6, 126.7, 122.8, 121.8, 120.5, 112.1, 43.2, 42.1, 36.5, 35.1, 31.7, 31.3, 25.3, 25.0, 15.2 ppm; IR (KBr)  $\nu$  = 3247, 2955, 2924, 1649, 1486, 1440, 1332, 1251, 1101, 1132, 1005, 932, 798, 751  $\text{cm}^{-1}$ ; HRMS (ESI):  $m/z$ : calcd for  $\text{C}_{25}\text{H}_{23}\text{NNaO}_3$ : 408.1576  $[\text{M} + \text{Na}]^+$ ; found: 408.1578.

**2-(1-(1H-Indol-3-yl)-2-oxo-2-phenylethylidene)-5,5-dimethylcyclohexane-1,3-dione (5a):** Yellow solid; mp: 92–93 °C.  $^1\text{H}$  NMR (400 MHz, DMSO, 25 °C):  $\delta$  = 10.90 (s, 1H), 10.64 (s, 1H), 7.77 (d,  $J$  = 8.0 Hz, 2H), 7.49 (t,  $J$  = 7.6 Hz, 1H), 7.42 (q,  $J$  = 8.0 Hz, 3H), 7.18 (d,  $J$  = 8.0 Hz, 1H),



6.91 (t,  $J = 8.0$  Hz, 1H), 6.81 (t,  $J = 7.6$  Hz, 1H), 5.81 (s, 1H), 2.30 (s, 3H), 2.24–1.99 (m, 4H), 0.83 ppm (s, 6H);  $^{13}\text{C}$  NMR (100 MHz, DMSO, 25 °C):  $\delta = 198.7, 196.1, 171.0, 138.3, 135.5, 133.3, 132.1, 129.0, 128.5, 127.8, 120.1, 119.8, 118.1, 114.8, 110.4, 109.0, 50.3, 43.3, 41.0, 32.3, 28.2, 12.5$  ppm; IR (KBr)  $\nu = 3348, 3060, 2959, 2872, 2652, 1735, 1691, 1638, 1455, 1421, 1372, 1251, 1147, 1100, 1046, 1007, 930, 847, 786, 744, 693$   $\text{cm}^{-1}$ ; HRMS (ESI)  $m/z$ : calcd for  $\text{C}_{25}\text{H}_{25}\text{NNaO}_3$ : 410.1732  $[\text{M} + \text{Na}]^+$ ; found: 410.1728.

**3-Acetyl-2-(1H-indol-3-yl)-1-phenylpentane-1,4-dione (5b)**: Brown viscous liquid;  $^1\text{H}$  NMR (400 MHz,  $\text{CDCl}_3$ , TMS, 25 °C):  $\delta = 8.80$  (s, 1H), 7.94 (d,  $J = 7.2$  Hz, 2H), 7.73–7.01 (m, 1H), 7.36 (t,  $J = 7.2$  Hz, 1H), 7.27–7.23 (m, 3H), 7.14–7.12 (m, 2H), 7.01 (d,  $J = 2.8$  Hz, 1H), 5.67 (d,  $J = 11.2$  Hz, 1H), 5.06 (d,  $J = 11.2$  Hz, 1H), 2.28 (s, 3H), 1.86 ppm (s, 3H);  $^{13}\text{C}$  NMR (100 MHz,  $\text{CDCl}_3$ , 25 °C):  $\delta = 204.0, 202.3, 197.8, 136.5, 135.8, 133.0, 128.7, 128.4, 125.7, 124.2, 122.5, 120.3, 118.9, 111.7, 109.0, 70.2, 45.5, 31.5, 30.3$  ppm; IR (KBr)  $\nu = 3398, 2934, 1725, 2696, 1597, 1355, 1264, 744, 691, 560, 504, 427$   $\text{cm}^{-1}$ ; HRMS (ESI):  $m/z$ : calcd for  $\text{C}_{21}\text{H}_{19}\text{NNaO}_3$ : 356.1263  $[\text{M} + \text{Na}]^+$ ; found: 356.1257.

**2-((2-Chlorophenyl)(2-methyl-1H-indol-3-yl)methylene)-5,5-dimethylcyclohexane-1,3-dione (7a)**: Orange solid; mp: 179–180 °C.  $^1\text{H}$  NMR (400 MHz, DMSO, 25 °C):  $\delta = 12.06$  (s, 1H), 7.38–7.29 (m, 5H), 7.01 (t,  $J = 8.0$  Hz, 1H), 6.80 (t,  $J = 8.0$  Hz, 1H), 6.41 (d,  $J = 8.0$  Hz, 1H), 2.70–2.59 (m, 2H), 2.43 (d,  $J = 8.0$  Hz, 2H), 2.19 (s, 3H), 1.09–1.01 ppm (m, 6H);  $^{13}\text{C}$  NMR (100 MHz, DMSO, 25 °C):  $\delta = 180.6, 136.1, 130.1, 128.2, 127.2, 122.2, 121.3, 119.9, 115.8, 111.9, 54.1, 29.9, 29.4, 27.9, 14.5$  ppm; IR (KBr)  $\nu = 3390, 2959, 2924, 2872, 2648, 1762, 1608, 1463, 1373, 1252, 1041, 909, 735$   $\text{cm}^{-1}$ ; HRMS (ESI):  $m/z$ : calcd for  $\text{C}_{24}\text{H}_{22}\text{ClNNaO}_2$ : 414.1237  $[\text{M} + \text{Na}]^+$ ; found: 414.1231.

**1-Denzyl-4-phenyl-1H-1,2,3-triazole (8a)**:<sup>3</sup> White solid; mp: 128–130 °C.  $^1\text{H}$  NMR (400 MHz,  $\text{CDCl}_3$ , 25 °C, TMS):  $\delta = 7.80$  (d,  $J = 4.0$  Hz, 2H), 7.66 (s, 1H), 7.42–7.36 (m, 5H), 7.33–7.30 (m, 3H), 5.58 ppm (s, 2H);  $^{13}\text{C}$  NMR (100 MHz,  $\text{CDCl}_3$ , 25 °C):  $\delta = 148.3, 134.7, 130.6, 129.2, 128.8, 128.2, 128.1, 125.7, 119.5, 54.3$  ppm.

**1-Benzyl-4-(4-fluorophenyl)-1H-1,2,3-triazole (8b)**:<sup>4</sup> White solid; mp: 109–110 °C;  $^1\text{H}$  NMR (400 MHz,  $\text{CDCl}_3$ , 25 °C, TMS):  $\delta = 7.75$  (q,  $J = 4.0$  Hz, 2H), 7.64 (s, 1H), 7.35 (s, 3H), 7.29 (d,  $J = 4.0$  Hz, 2H), 7.05 (d,  $J = 8.4$  Hz, 2H), 5.53 ppm (s, 2H);  $^{13}\text{C}$  NMR (100 MHz,  $\text{CDCl}_3$ , 25 °C):  $\delta = 162.7$  (d,  $J = 246.0$  Hz), 147.3, 134.7, 129.2, 128.8, 128.1, 127.45 (d,  $J = 9.0$  Hz), 119.4, 115.8 (d,  $J = 21.0$  Hz), 54.2 ppm;  $^{19}\text{F}$  NMR (377 MHz,  $\text{CDCl}_3$ , 25 °C):  $\delta = -113.5$  ppm (heptet,  $J = 5.6$  Hz, 1F).

**1-Benzyl-4-(4-methoxyphenyl)-1H-1,2,3-triazole (8c)**:<sup>4</sup> White solid; mp: 138–139 °C.  $^1\text{H}$  NMR (400 MHz,  $\text{CDCl}_3$ , 25 °C, TMS):  $\delta = 7.71$  (d,  $J = 8.0$  Hz, 2H), 7.58 (s, 1H), 7.37–7.35 (m, 3H), 7.29–7.27 (m, 2H), 6.92 (d,  $J = 12.0$  Hz, 2H), 5.52 (s, 2H), 3.80 ppm (s, 3H);  $^{13}\text{C}$  NMR (100 MHz,

CDCl<sub>3</sub>, 25 °C):  $\delta$  = 159.6, 148.1, 134.8, 129.1, 128.7, 128.0, 127.0, 123.3, 118.8, 114.2, 55.3, 54.2 ppm.

**1-Benzyl-4-(4-(*tert*-butyl)phenyl)-1*H*-1,2,3-triazole (8d):**<sup>4</sup> White solid; mp: 112–113 °C. <sup>1</sup>H NMR (400 MHz, CDCl<sub>3</sub>, 25 °C, TMS):  $\delta$  = 7.72 (d, *J* = 8.0 Hz, 2H), 7.64 (s, 1H), 7.41 (d, *J* = 8.0 Hz, 2H), 7.35–7.34 (m, 3H), 7.28–7.26 (m, 2H), 5.52 (s, 2H), 1.23 ppm (s, 9H); <sup>13</sup>C NMR (100 MHz, CDCl<sub>3</sub>, 25 °C):  $\delta$  = 151.3, 148.2, 134.9, 129.1, 128.7, 128.0, 127.8, 125.8, 125.5, 119.4, 54.2, 34.7, 31.3 ppm.

**1-Benzyl-4-(4-ethylphenyl)-1*H*-1,2,3-triazole (8e):**<sup>3</sup> White solid; mp: 147–148 °C. <sup>1</sup>H NMR (400 MHz, CDCl<sub>3</sub>, 25 °C, TMS):  $\delta$  = 7.70 (d, *J* = 8.0 Hz, 2H), 7.63 (s, 1H), 7.35–7.33 (m, 3H), 7.28–7.26 (m, 2H), 7.21 (d, *J* = 8.0 Hz, 2H), 5.51 (s, 2H), 2.64 (q, *J* = 8.0 Hz, 2H), 1.23 ppm (t, *J* = 8.0 Hz, 3H); <sup>13</sup>C NMR (100 MHz, CDCl<sub>3</sub>, 25 °C):  $\delta$  = 148.3, 144.4, 134.8, 129.1, 128.7, 128.3, 128.0, 125.7, 119.3, 54.2, 28.7, 15.5 ppm.

**1-Benzyl-4-(4-pentylphenyl)-1*H*-1,2,3-triazole (8f):**<sup>5</sup> White solid; mp: 103–104 °C. <sup>1</sup>H NMR (400 MHz, CDCl<sub>3</sub>, 25 °C, TMS):  $\delta$  = 7.70 (d, *J* = 8.0 Hz, 2H), 7.62 (s, 1H), 7.37–7.35 (m, 3H), 7.29–7.27 (m, 2H), 7.20 (d, *J* = 8.0 Hz, 2H), 5.53 (s, 2H), 2.60 (t, *J* = 8.0 Hz, 2H), 1.61 (quint, *J* = 8.0 Hz, 2H), 1.35–1.26 (m, 4H), 0.88 ppm (t, *J* = 8.0 Hz, 3H); <sup>13</sup>C NMR (100 MHz, CDCl<sub>3</sub>, 25 °C):  $\delta$  = 148.3, 143.1, 134.8, 129.1, 128.9, 128.7, 128.0, 125.6, 119.3, 54.2, 35.7, 31.5, 31.1, 22.6, 14.1 ppm.

**1-Benzyl-4-(4-propylphenyl)-1*H*-1,2,3-triazole (8g):**<sup>6</sup> White solid; mp: 113–115 °C. <sup>1</sup>H NMR (400 MHz, CDCl<sub>3</sub>, 25 °C, TMS):  $\delta$  = 7.70 (d, *J* = 8.0 Hz, 2H), 7.62 (s, 1H), 7.38–7.34 (m, 3H), 7.29–7.27 (m, 2H), 7.20 (d, *J* = 8.0 Hz, 2H), 5.54 (s, 2H), 2.59 (d, *J* = 7.6 Hz, 2H), 1.68–1.59 (m, 2H), 0.93 ppm (t, *J* = 8.0 Hz, 3H); <sup>13</sup>C NMR (100 MHz, CDCl<sub>3</sub>, 25 °C):  $\delta$  = 148.3, 142.9, 134.8, 129.1, 128.9, 128.7, 128.0, 125.6, 119.2, 54.2, 37.8, 24.5, 13.8 ppm.

**1-Phenethyl-4-phenyl-1*H*-1,2,3-triazole (8h):**<sup>6</sup> White solid; mp: 124–125 °C. <sup>1</sup>H NMR (400 MHz, CDCl<sub>3</sub>, 25 °C, TMS):  $\delta$  = 7.77–7.75 (m, 2H), 7.47 (s, 1H), 7.38 (t, *J* = 8.0 Hz, 2H), 7.31–7.21 (m, 4H), 7.10 (d, *J* = 4.0 Hz, 2H), 4.59 (t, *J* = 7.6 Hz, 2H), 3.21 ppm (t, *J* = 8.0 Hz, 2H); <sup>13</sup>C NMR (100 MHz, CDCl<sub>3</sub>, 25 °C):  $\delta$  = 147.5, 137.1, 130.7, 128.9, 128.8, 128.1, 127.1, 125.7, 120.0, 51.7, 36.8 ppm.

**1-Ethyl-4-phenyl-1*H*-1,2,3-triazole (8i):**<sup>6</sup> White solid; mp: 55–57 °C. <sup>1</sup>H NMR (400 MHz, CDCl<sub>3</sub>, 25 °C, TMS):  $\delta$  = 7.83–7.81 (m, 2H), 7.76 (s, 1H), 7.41 (t, *J* = 8.0 Hz, 2H), 7.32 (m, 1H), 4.43 (q, *J* = 8.0 Hz, 2H), 1.58 ppm (t, *J* = 7.6 Hz, 3H); <sup>13</sup>C NMR (100 MHz, CDCl<sub>3</sub>, 25 °C):  $\delta$  = 147.8, 130.8, 128.8, 128.1, 125.7, 119.0, 45.4, 15.5 ppm.

**1-Ethyl-4-(4-fluorophenyl)-1*H*-1,2,3-triazole (8j):**<sup>4</sup> White solid; mp: 114–115 °C. <sup>1</sup>H NMR (400 MHz, CDCl<sub>3</sub>, 25 °C, TMS):  $\delta$  = 7.81–7.77 (m, 2H), 7.74 (s, 1H), 7.10 (t, *J* = 8.0 Hz, 2H), 4.44 (q, *J* = 8.0 Hz, 2H), 1.58 ppm (t, *J* = 7.6 Hz, 3H); <sup>13</sup>C NMR (100 MHz, CDCl<sub>3</sub>, 25 °C):  $\delta$  = 163.8,

161.4, 146.9, 127.38 (d,  $J = 12.0$  Hz), 118.8, 115.7 (d,  $J = 22.0$  Hz), 45.4, 15.5 ppm.  $^{19}\text{F}$  NMR (377 MHz,  $\text{CDCl}_3$ , 25 °C):  $\delta = -113.8$  ppm (heptet,  $J = 5.7$  Hz, 1F).

**4-Phenyl-1-propyl-1H-1,2,3-triazole (8k):**<sup>7</sup> White solid; mp: 102–103 °C.  $^1\text{H}$  NMR (400 MHz,  $\text{CDCl}_3$ , 25 °C, TMS):  $\delta = 7.83$  (d,  $J = 8.0$  Hz, 2H), 7.75 (s, 1H), 7.41 (t,  $J = 8.0$  Hz, 2H), 7.31 (t,  $J = 8.0$  Hz, 1H), 4.36 (t,  $J = 8.0$  Hz, 2H), 1.94–1.90 (m, 2H), 1.33–1.25 (m, 14H), 0.87 ppm (t,  $J = 8.0$  Hz, 3H);  $^{13}\text{C}$  NMR (100 MHz,  $\text{CDCl}_3$ , 25 °C):  $\delta = 147.7$ , 130.8, 128.8, 128.0, 125.7, 119.5, 50.4, 31.9, 30.4, 29.5, 29.4, 29.3, 29.0, 26.5, 22.7, 14.1 ppm.

**4-((4-Phenyl-1H-1,2,3-triazol-1-yl)methyl)benzoic acid (8l):**<sup>8</sup> White solid; mp: 114–116 °C.  $^1\text{H}$  NMR (400 MHz, DMSO, 25 °C):  $\delta = 8.66$  (s, 1H), 7.96 (d,  $J = 8.0$  Hz, 2H), 7.86 (d,  $J = 8.0$  Hz, 2H), 7.46–7.42 (m, 4H), 7.34–7.31 (m, 1H), 5.75 ppm (s, 2H);  $^{13}\text{C}$  NMR (100 MHz, DMSO, 25 °C):  $\delta = 167.5$ , 147.2, 141.1, 131.2, 131.0, 130.3, 129.4, 128.4, 125.7, 122.3, 53.1 ppm.

**1-(4-Nitrobenzyl)-4-phenyl-1H-1,2,3-triazole (8m):**<sup>6</sup> White solid; mp: 140–141 °C.  $^1\text{H}$  NMR (400 MHz,  $\text{CDCl}_3$ , 25 °C, TMS):  $\delta = 8.20$  (d,  $J = 8.0$  Hz, 2H), 7.80 (d,  $J = 8.0$  Hz, 3H), 7.43–7.39 (m, 4H), 7.35–7.31 (m, 1H), 5.68 ppm (s, 2H);  $^{13}\text{C}$  NMR (100 MHz,  $\text{CDCl}_3$ , 25 °C):  $\delta = 148.7$ , 148.1, 141.8, 130.1, 128.9, 128.6, 128.5, 125.8, 124.3, 119.9, 53.2 ppm.

**1-Benzyl-4-(phoxymethyl)-1H-1,2,3-triazole (8n):**<sup>3</sup> White solid; mp: 102–104 °C.  $^1\text{H}$  NMR (400 MHz,  $\text{CDCl}_3$ , 25 °C, TMS):  $\delta = 7.52$  (s, 2H), 7.37–7.33 (m, 3H), 7.28–7.24 (m, 4H), 6.96–6.93 (m, 3H), 5.50 (s, 2H), 5.16 ppm (s, 2H);  $^{13}\text{C}$  NMR (100 MHz,  $\text{CDCl}_3$ , 25 °C):  $\delta = 158.2$ , 144.7, 134.5, 129.6, 129.2, 128.8, 128.1, 122.7, 121.3, 114.8, 62.1, 54.2 ppm.

**1-Hexyl-4-phenyl-1H-1,2,3-triazole (8o):**<sup>4</sup> White solid; mp: 63–64 °C.  $^1\text{H}$  NMR (400 MHz,  $\text{CDCl}_3$ , 25 °C, TMS):  $\delta = 7.84$ –7.82 (m, 2H), 7.75 (s, 1H), 7.41 (t,  $J = 8.0$  Hz, 2H), 7.32 (t,  $J = 8.0$  Hz, 1H), 4.37 (t,  $J = 8.0$  Hz, 2H), 1.96–1.89 (m, 2H), 1.36–1.29 (m, 6H), 0.88 ppm (t,  $J = 8.0$  Hz, 3H);  $^{13}\text{C}$  NMR (100 MHz,  $\text{CDCl}_3$ , 25 °C):  $\delta = 147.7$ , 130.8, 128.8, 128.1, 125.7, 119.5, 50.4, 31.2, 30.3, 26.2, 22.4, 13.9 ppm.

**1,4-Diphenylbuta-1,3-diyne (9a):**<sup>5</sup> White solid; mp: 83–85 °C.  $^1\text{H}$  NMR (400 MHz,  $\text{CDCl}_3$ , 25 °C, TMS):  $\delta = 7.51$ –7.52 (m, 5H), 7.33–7.31 ppm (m, 5H);  $^{13}\text{C}$  NMR (100 MHz,  $\text{CDCl}_3$ , 25 °C):  $\delta = 132.6$ , 129.3, 128.5, 121.9, 81.7, 74.1 ppm.

**1-(4-Methoxyphenyl)-1H-indole (10a):**<sup>9</sup> White solid; mp: 70–72 °C.  $^1\text{H}$  NMR (400 MHz,  $\text{CDCl}_3$ , 25 °C, TMS):  $\delta = 7.68$  (d,  $J = 8.0$  Hz, 1H), 7.46 (d,  $J = 8.0$  Hz, 1H), 7.40 (d,  $J = 8.0$  Hz, 2H), 7.28 (d,  $J = 4.0$  Hz, 1H), 7.22–7.13 (m, 2H), 7.03 (d,  $J = 8.0$  Hz, 2H), 6.65 (d,  $J = 4.0$  Hz, 1H), 3.87 ppm (d, 3H);  $^{13}\text{C}$  NMR (100 MHz,  $\text{CDCl}_3$ , 25 °C):  $\delta = 158.3$ , 138.2, 136.3, 132.9, 129.0, 128.3, 126.0, 122.2, 121.0, 120.1, 114.7, 110.4, 102.9, 55.6 ppm.

## 5. <sup>1</sup>H NMR and <sup>13</sup>C NMR spectra

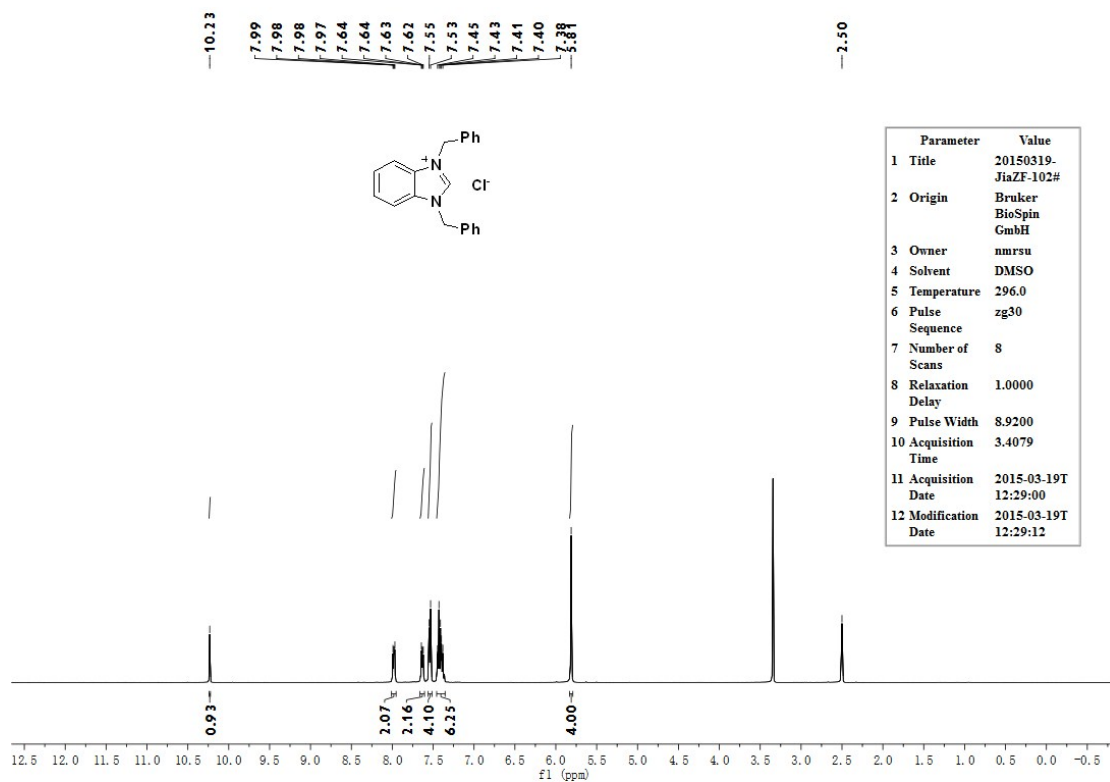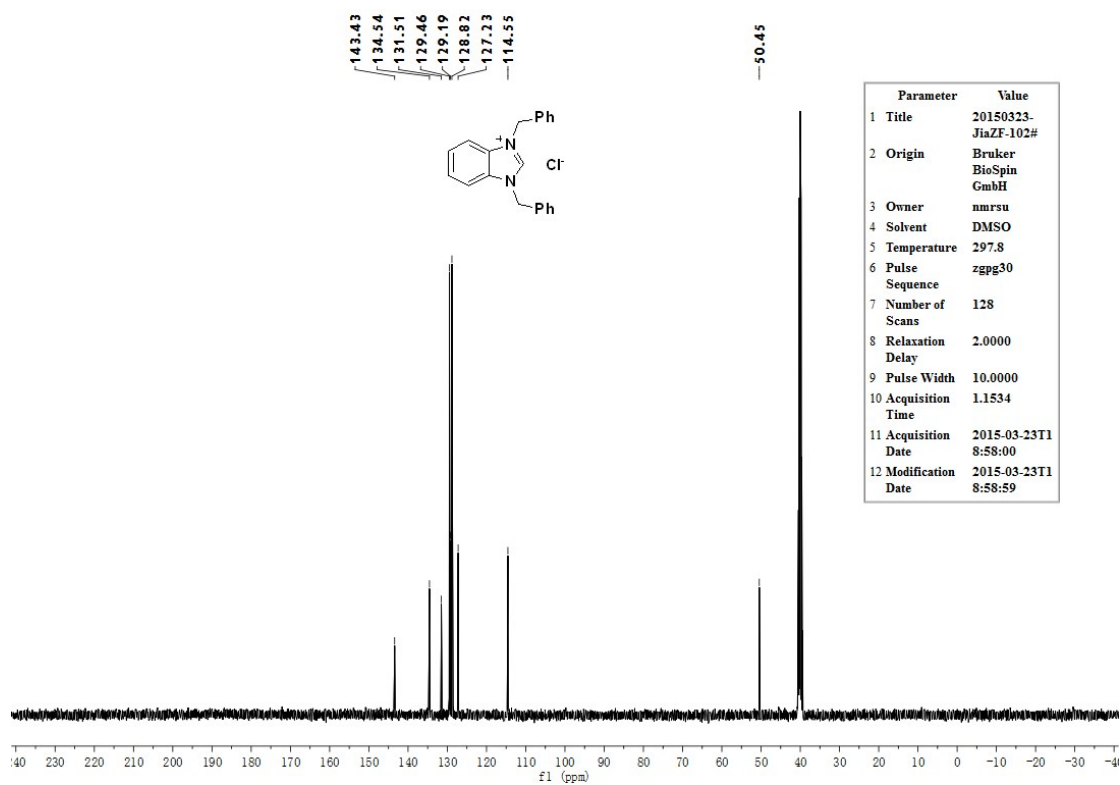

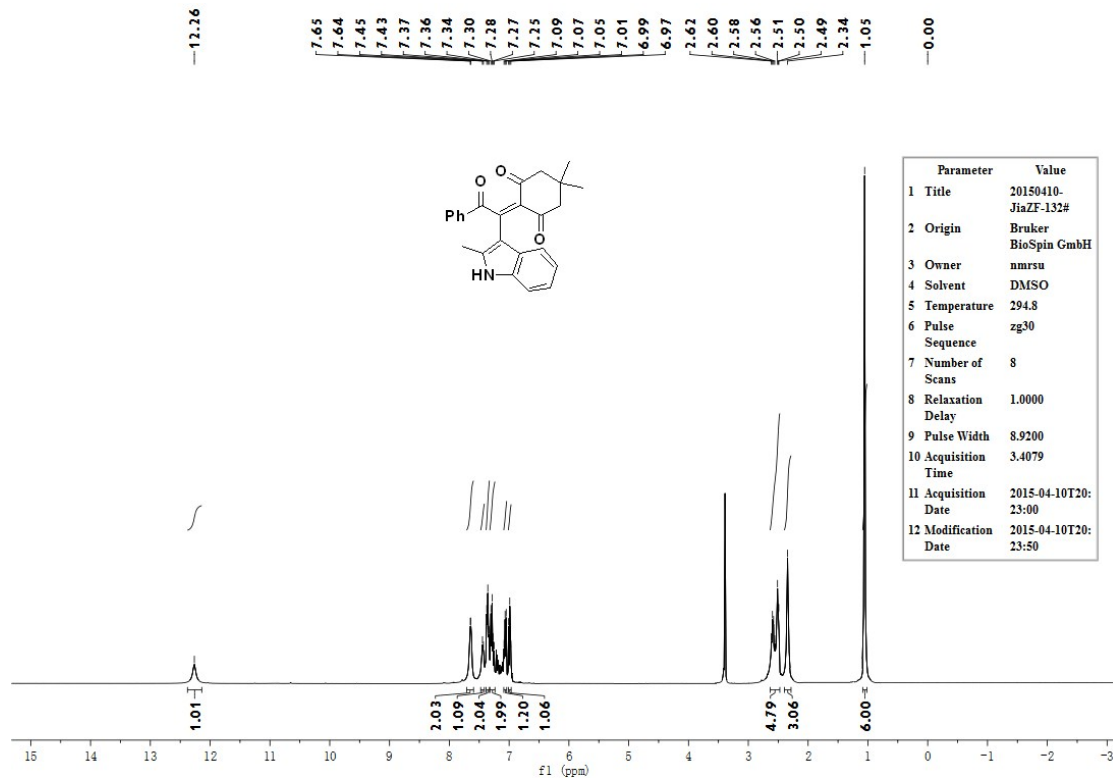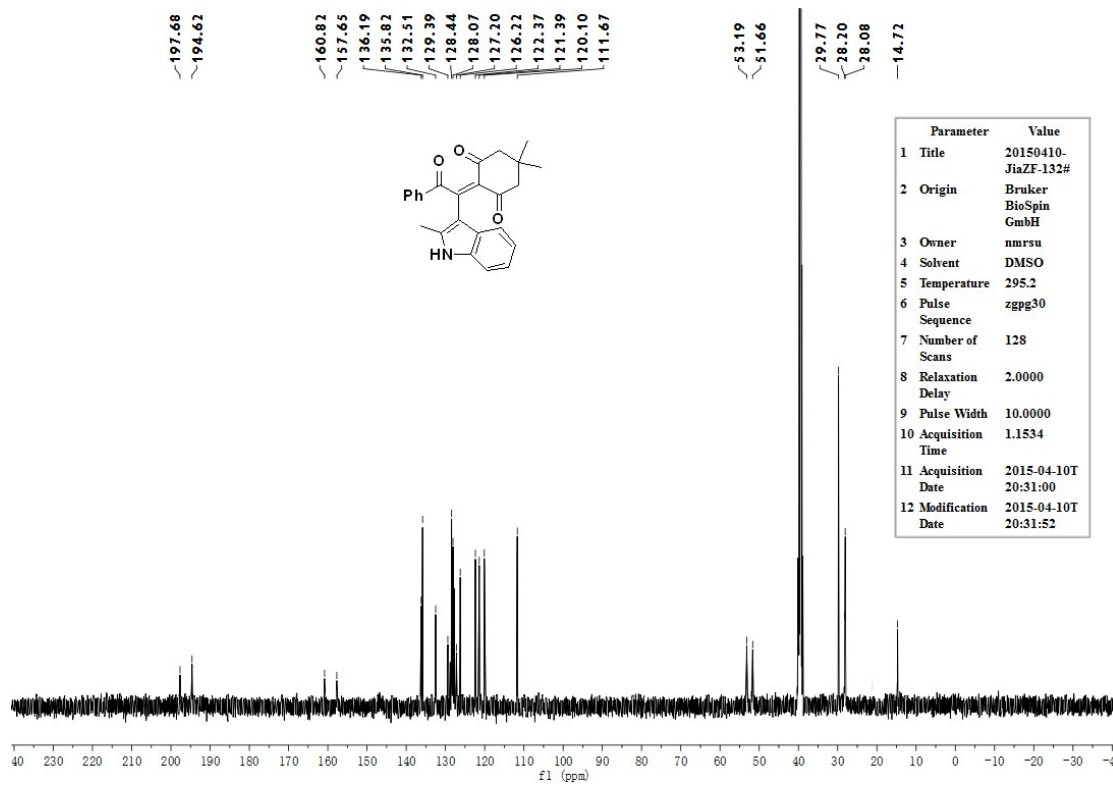

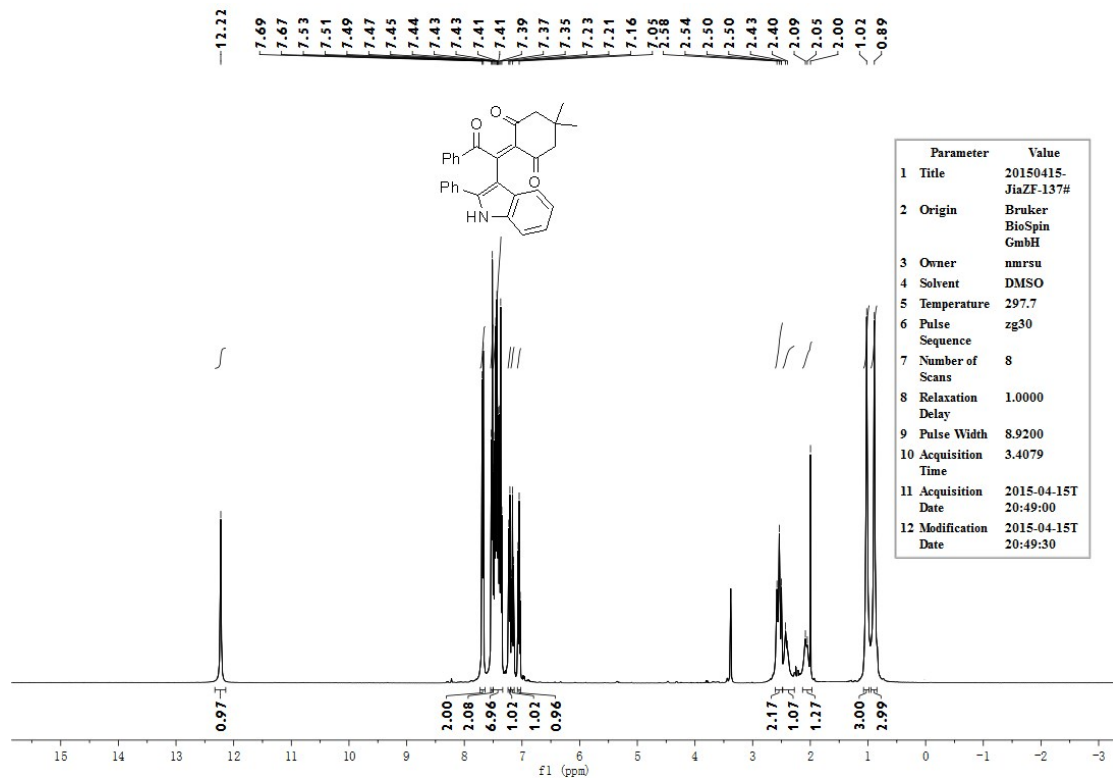

| Parameter            | Value                |
|----------------------|----------------------|
| 1 Title              | 20150415-JiaZF-137#  |
| 2 Origin             | Bruker BioSpin GmbH  |
| 3 Owner              | nmrsu                |
| 4 Solvent            | DMSO                 |
| 5 Temperature        | 297.7                |
| 6 Pulse Sequence     | zg30                 |
| 7 Number of Scans    | 8                    |
| 8 Relaxation Delay   | 1.0000               |
| 9 Pulse Width        | 8.9200               |
| 10 Acquisition Time  | 3.4079               |
| 11 Acquisition Date  | 2015-04-15T 20:49:00 |
| 12 Modification Date | 2015-04-15T 20:49:30 |

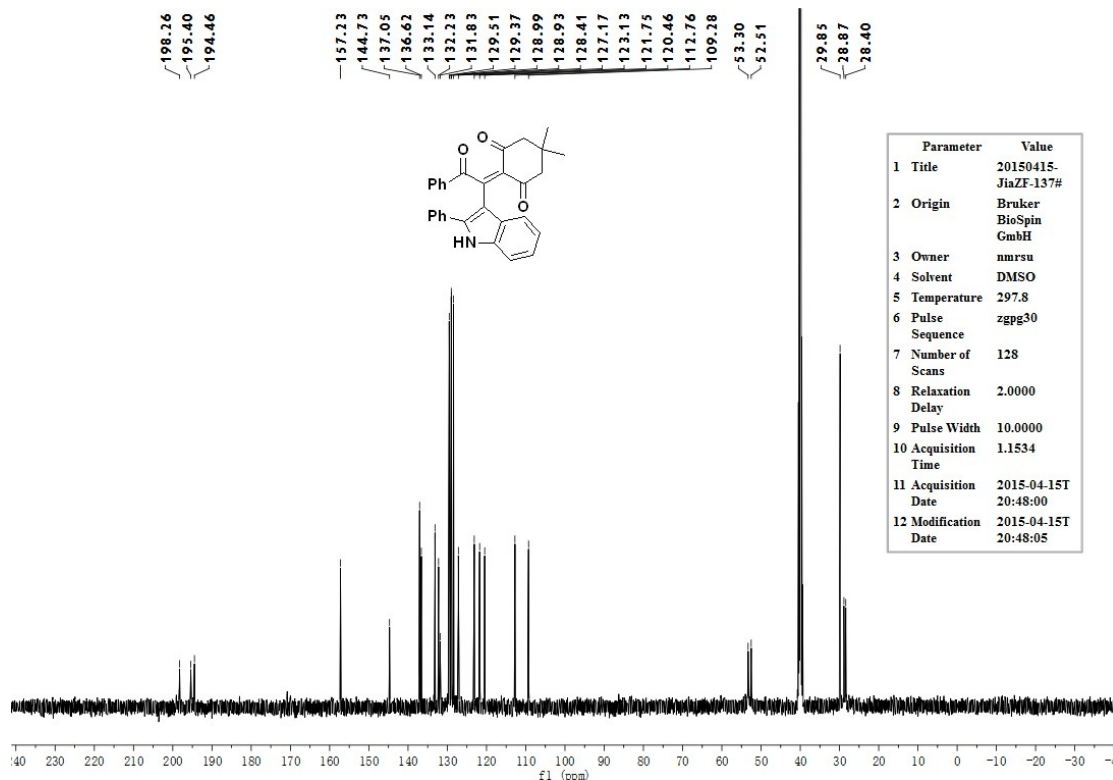

| Parameter            | Value                |
|----------------------|----------------------|
| 1 Title              | 20150415-JiaZF-137#  |
| 2 Origin             | Bruker BioSpin GmbH  |
| 3 Owner              | nmrsu                |
| 4 Solvent            | DMSO                 |
| 5 Temperature        | 297.8                |
| 6 Pulse Sequence     | zgpg30               |
| 7 Number of Scans    | 128                  |
| 8 Relaxation Delay   | 2.0000               |
| 9 Pulse Width        | 10.0000              |
| 10 Acquisition Time  | 1.1534               |
| 11 Acquisition Date  | 2015-04-15T 20:48:00 |
| 12 Modification Date | 2015-04-15T 20:48:05 |

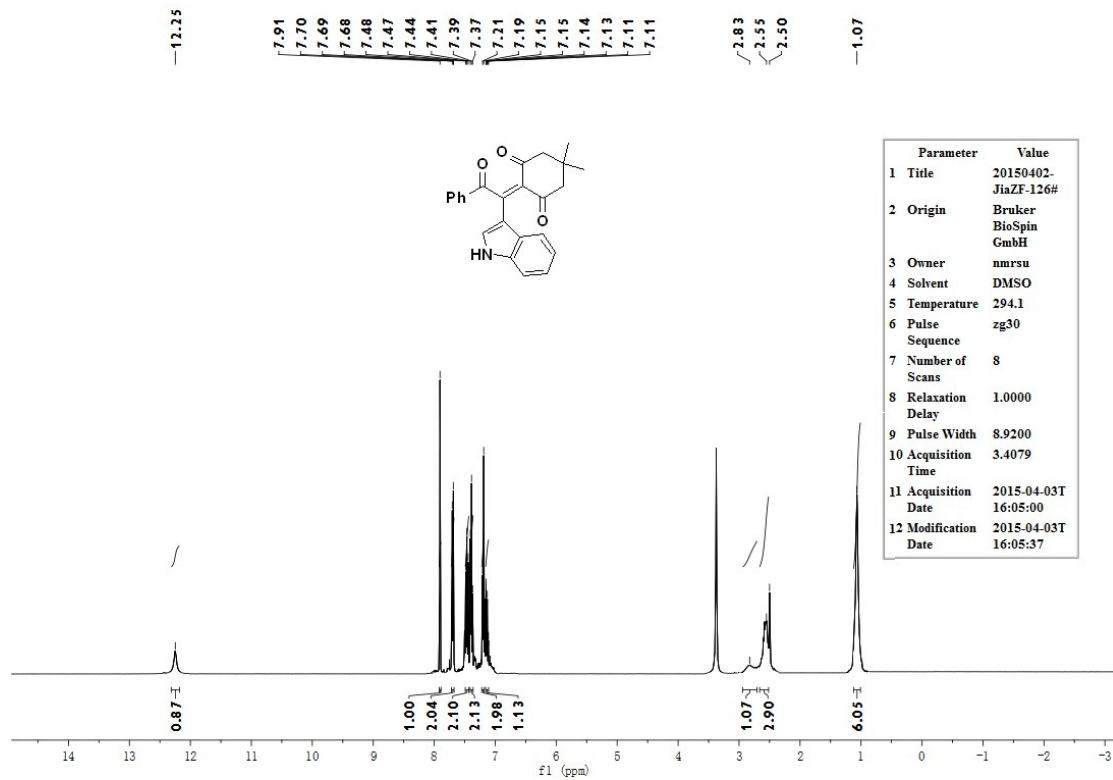

| Parameter            | Value                |
|----------------------|----------------------|
| 1 Title              | 20150402-JiaZF-126#  |
| 2 Origin             | Bruker BioSpin GmbH  |
| 3 Owner              | nmrsu                |
| 4 Solvent            | DMSO                 |
| 5 Temperature        | 294.1                |
| 6 Pulse Sequence     | zg30                 |
| 7 Number of Scans    | 8                    |
| 8 Relaxation Delay   | 1.0000               |
| 9 Pulse Width        | 8.9200               |
| 10 Acquisition Time  | 3.4079               |
| 11 Acquisition Date  | 2015-04-03T 16:05:00 |
| 12 Modification Date | 2015-04-03T 16:05:37 |

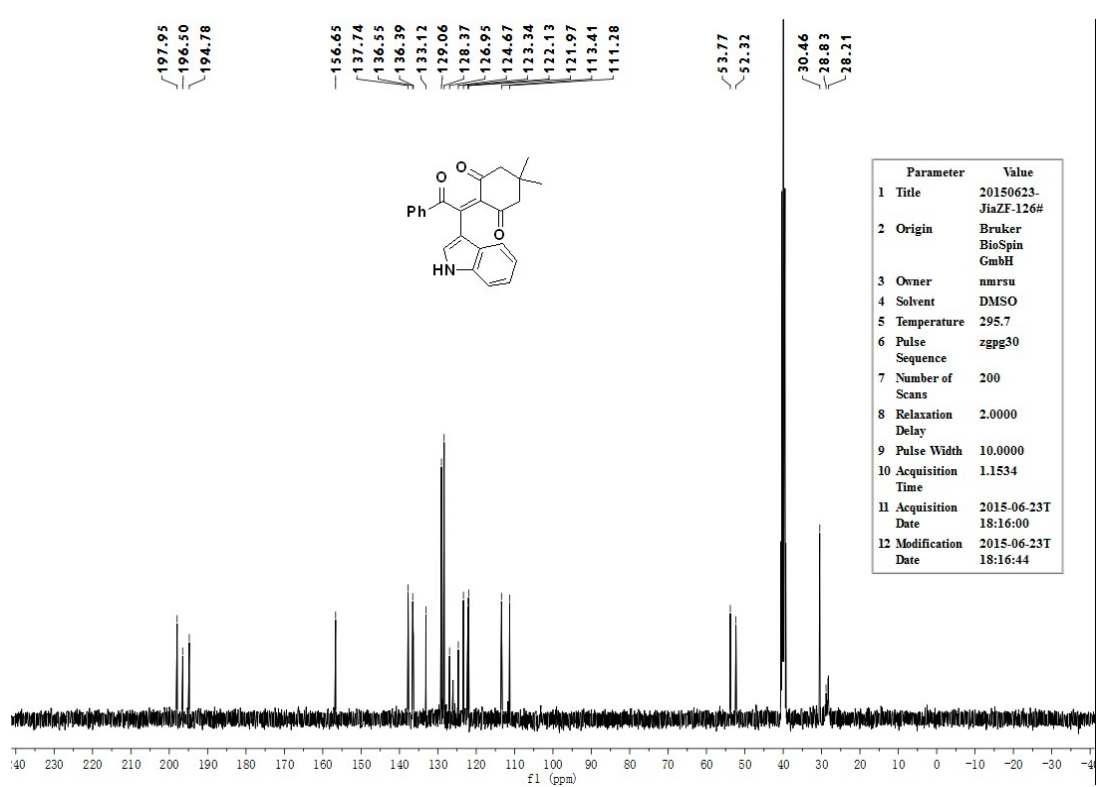

| Parameter            | Value                |
|----------------------|----------------------|
| 1 Title              | 20150623-JiaZF-126#  |
| 2 Origin             | Bruker BioSpin GmbH  |
| 3 Owner              | nmrsu                |
| 4 Solvent            | DMSO                 |
| 5 Temperature        | 295.7                |
| 6 Pulse Sequence     | zgpg30               |
| 7 Number of Scans    | 200                  |
| 8 Relaxation Delay   | 2.0000               |
| 9 Pulse Width        | 10.0000              |
| 10 Acquisition Time  | 1.1534               |
| 11 Acquisition Date  | 2015-06-23T 18:16:00 |
| 12 Modification Date | 2015-06-23T 18:16:44 |

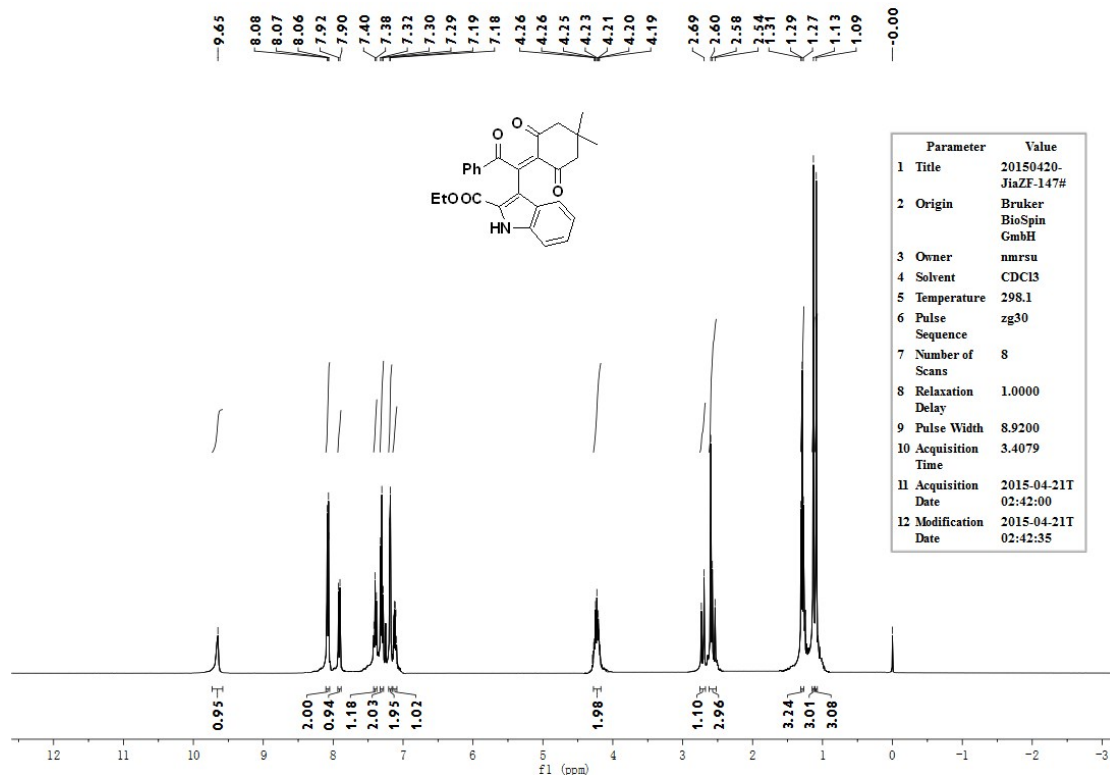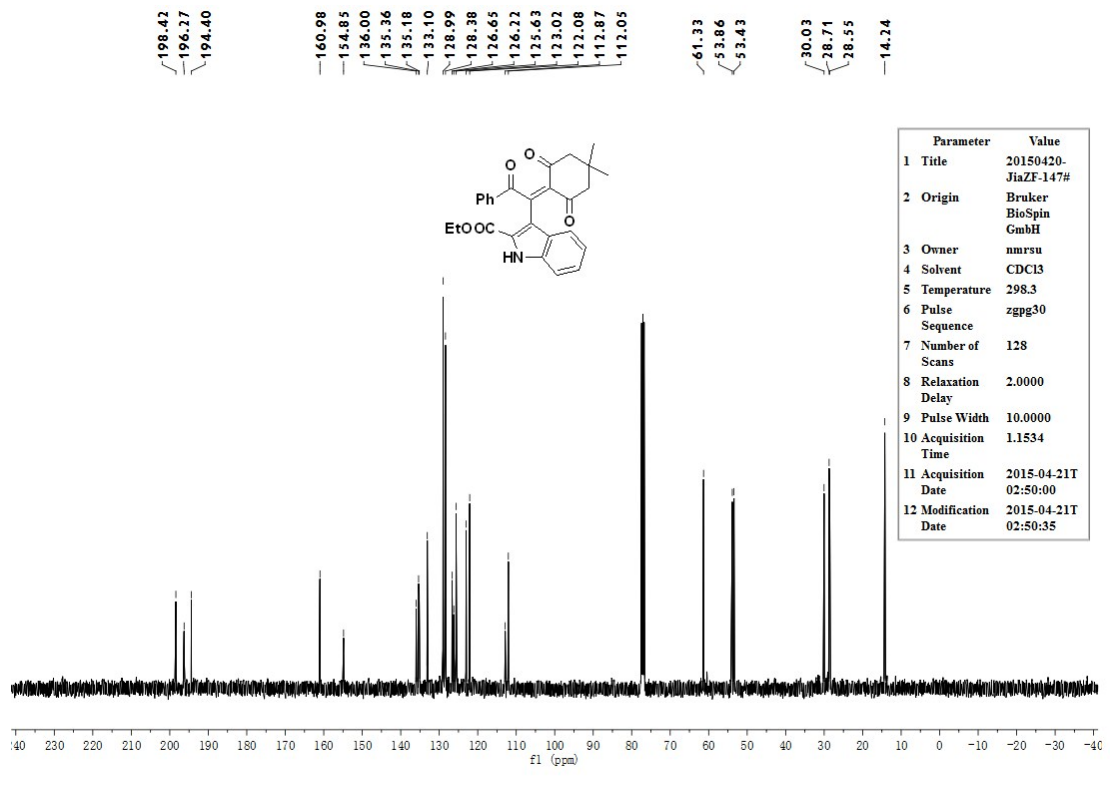



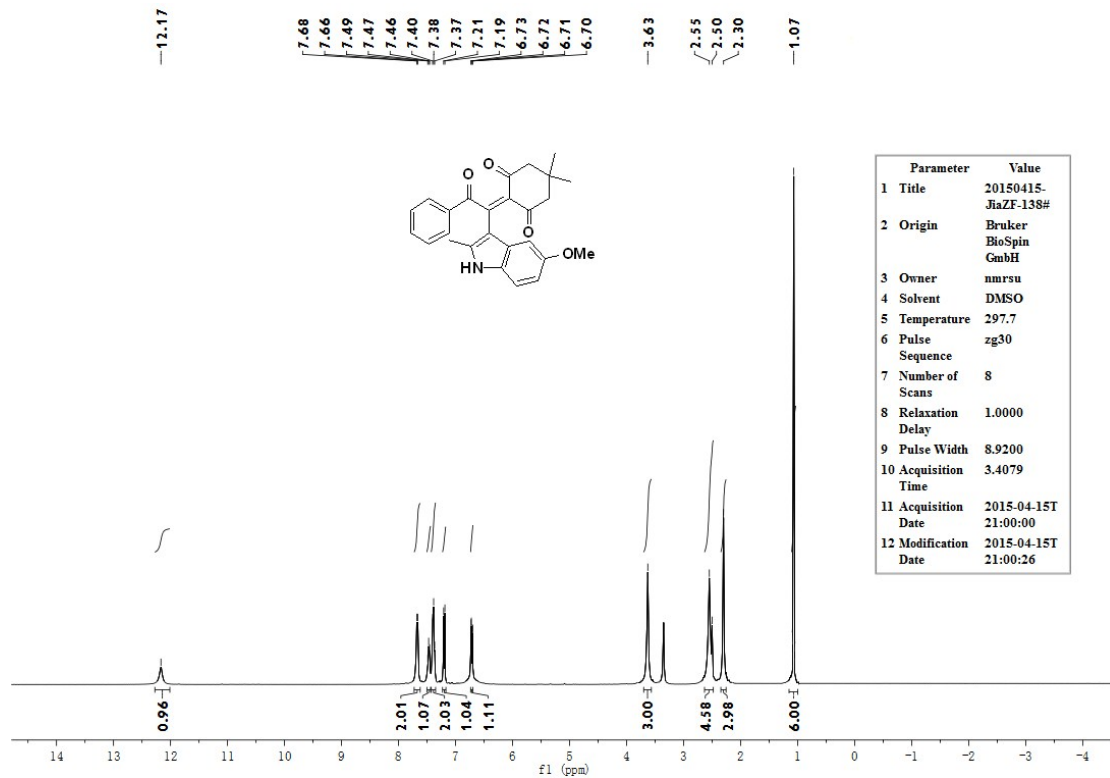

| Parameter            | Value                |
|----------------------|----------------------|
| 1 Title              | 20150415-JiaZF-138#  |
| 2 Origin             | Bruker BioSpin GmbH  |
| 3 Owner              | nmrsu                |
| 4 Solvent            | DMSO                 |
| 5 Temperature        | 297.7                |
| 6 Pulse Sequence     | zg30                 |
| 7 Number of Scans    | 8                    |
| 8 Relaxation Delay   | 1.0000               |
| 9 Pulse Width        | 8.9200               |
| 10 Acquisition Time  | 3.4079               |
| 11 Acquisition Date  | 2015-04-15T 21:00:00 |
| 12 Modification Date | 2015-04-15T 21:00:26 |

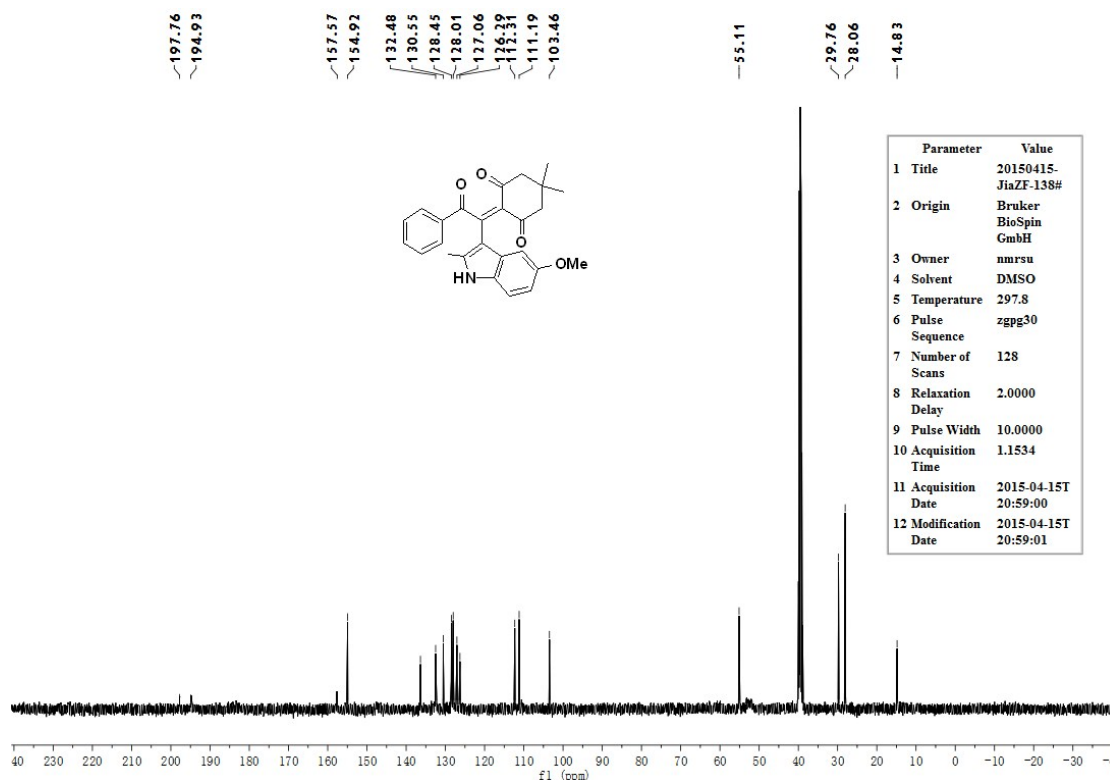

| Parameter            | Value                |
|----------------------|----------------------|
| 1 Title              | 20150415-JiaZF-138#  |
| 2 Origin             | Bruker BioSpin GmbH  |
| 3 Owner              | nmrsu                |
| 4 Solvent            | DMSO                 |
| 5 Temperature        | 297.8                |
| 6 Pulse Sequence     | zgpg30               |
| 7 Number of Scans    | 128                  |
| 8 Relaxation Delay   | 2.0000               |
| 9 Pulse Width        | 10.0000              |
| 10 Acquisition Time  | 1.1534               |
| 11 Acquisition Date  | 2015-04-15T 20:59:00 |
| 12 Modification Date | 2015-04-15T 20:59:01 |

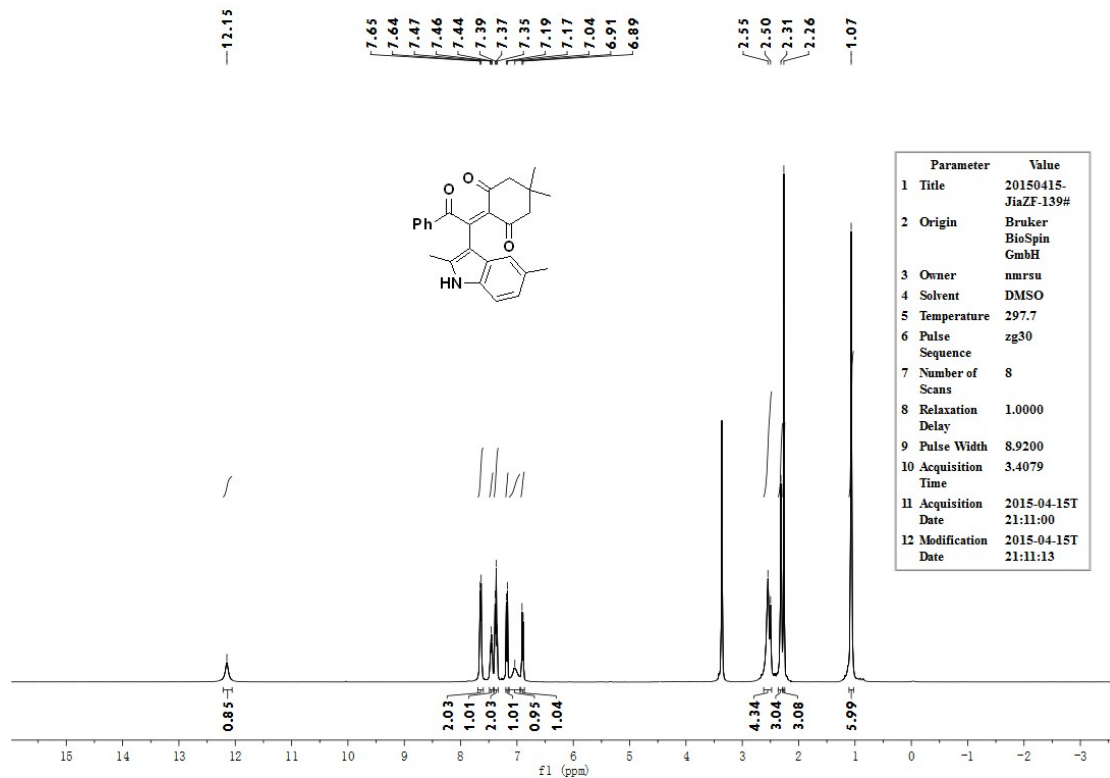

| Parameter            | Value                |
|----------------------|----------------------|
| 1 Title              | 20150415-JiaZF-139#  |
| 2 Origin             | Bruker BioSpin GmbH  |
| 3 Owner              | nmrsu                |
| 4 Solvent            | DMSO                 |
| 5 Temperature        | 297.7                |
| 6 Pulse Sequence     | zg30                 |
| 7 Number of Scans    | 8                    |
| 8 Relaxation Delay   | 1.0000               |
| 9 Pulse Width        | 8.9200               |
| 10 Acquisition Time  | 3.4079               |
| 11 Acquisition Date  | 2015-04-15T 21:11:00 |
| 12 Modification Date | 2015-04-15T 21:11:13 |

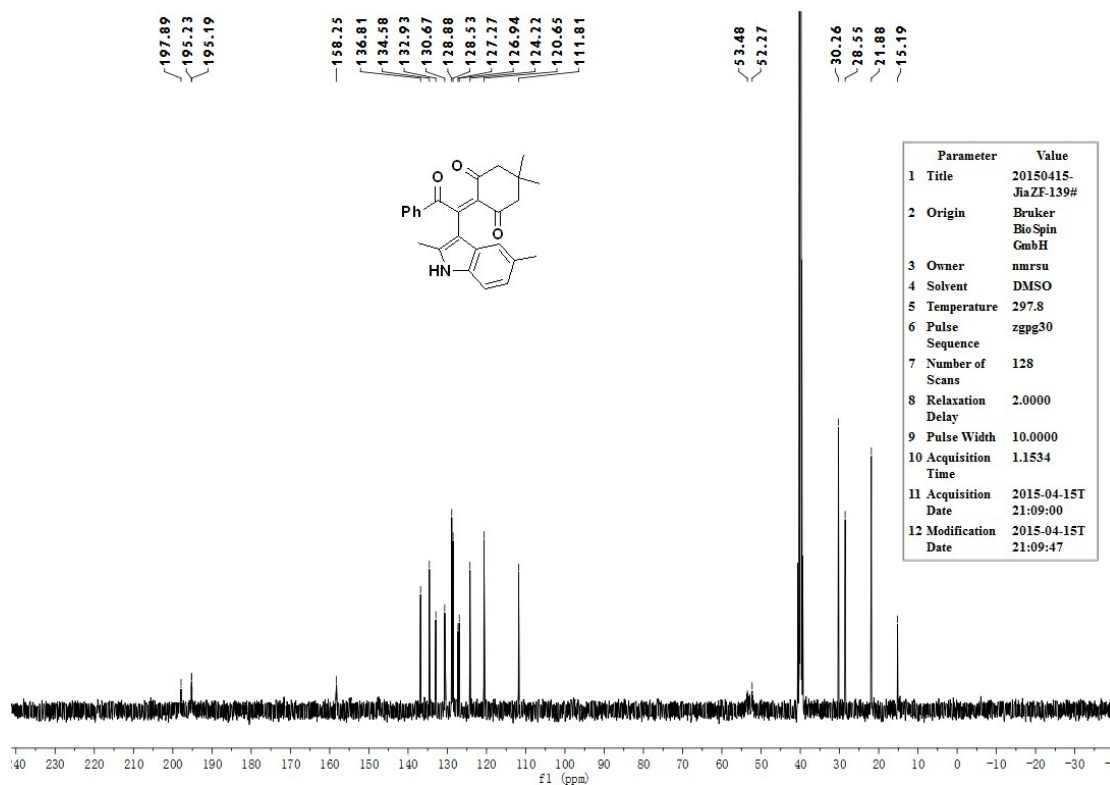

| Parameter            | Value                |
|----------------------|----------------------|
| 1 Title              | 20150415-JiaZF-139#  |
| 2 Origin             | Bruker BioSpin GmbH  |
| 3 Owner              | nmrsu                |
| 4 Solvent            | DMSO                 |
| 5 Temperature        | 297.8                |
| 6 Pulse Sequence     | zgpg30               |
| 7 Number of Scans    | 128                  |
| 8 Relaxation Delay   | 2.0000               |
| 9 Pulse Width        | 10.0000              |
| 10 Acquisition Time  | 1.1534               |
| 11 Acquisition Date  | 2015-04-15T 21:09:00 |
| 12 Modification Date | 2015-04-15T 21:09:47 |

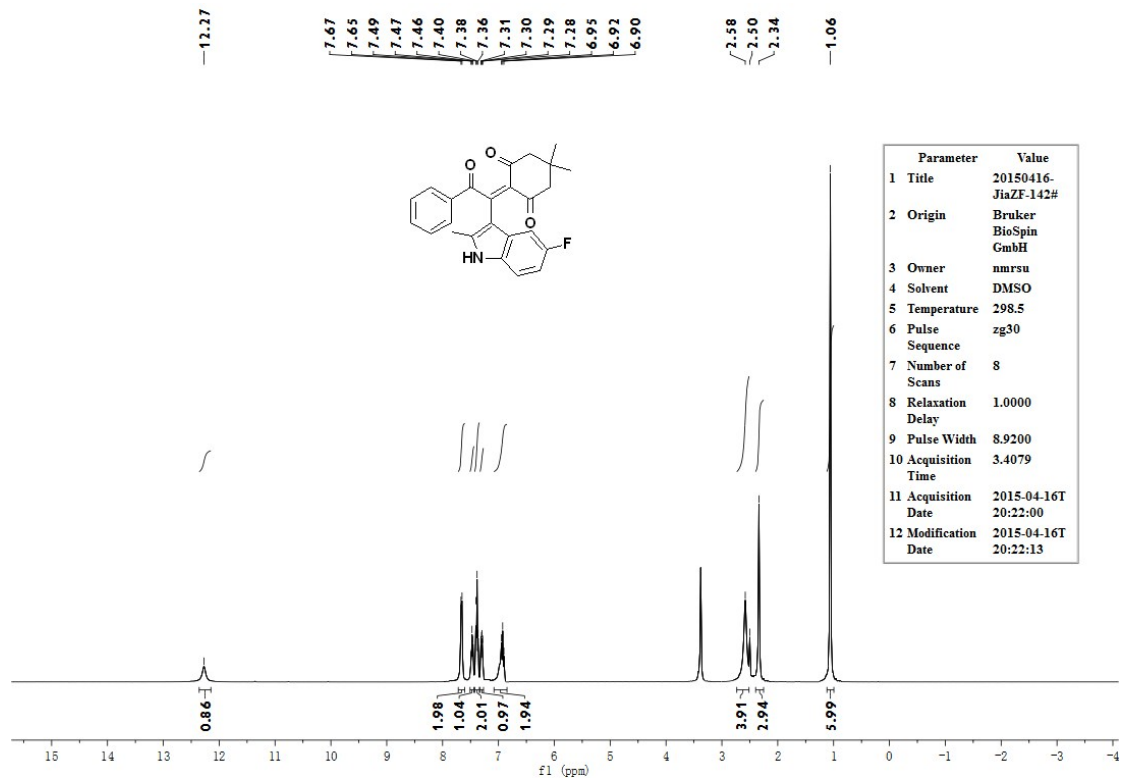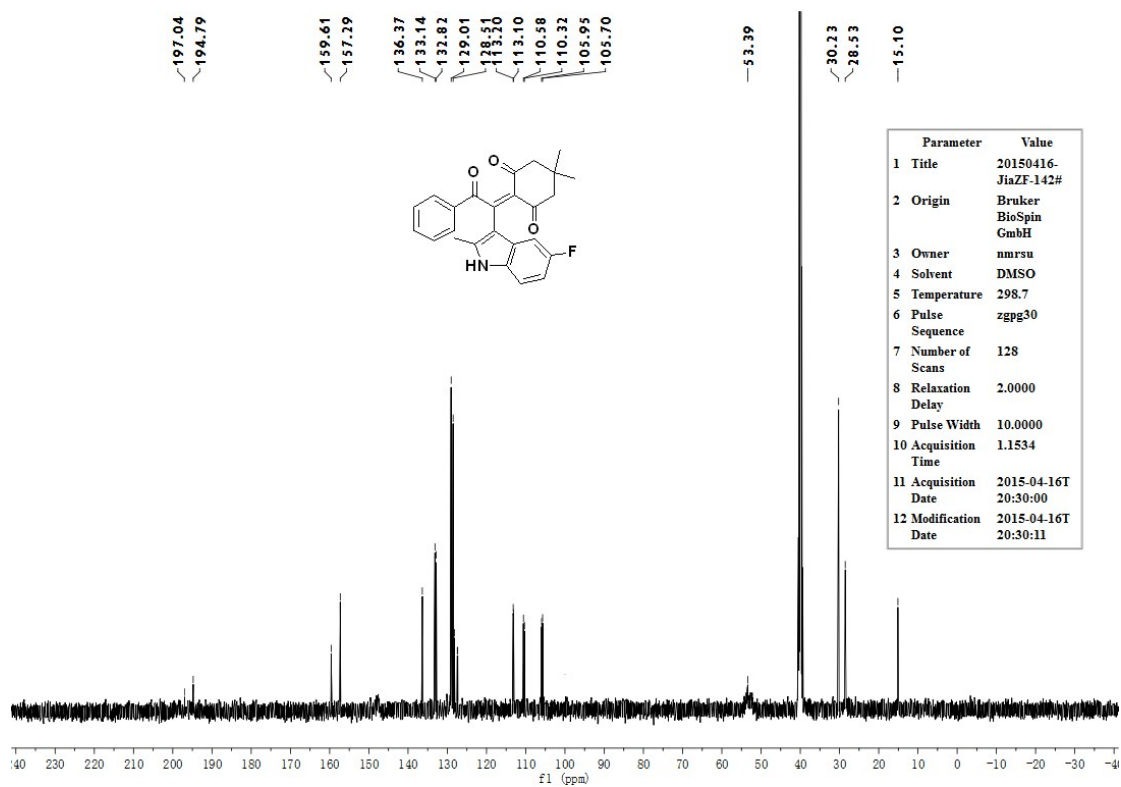

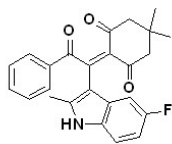

--121.42

| Parameter            | Value                |
|----------------------|----------------------|
| 1 Title              | 20150612-JiaZF-142#  |
| 2 Origin             | Bruker BioSpin GmbH  |
| 3 Owner              | nmrsu                |
| 4 Solvent            | DMSO                 |
| 5 Temperature        | 294.7                |
| 6 Pulse Sequence     | zgpg30               |
| 7 Number of Scans    | 64                   |
| 8 Relaxation Delay   | 1.5000               |
| 9 Pulse Width        | 14.0000              |
| 10 Acquisition Time  | 0.5767               |
| 11 Acquisition Date  | 2015-06-12T 17:18:00 |
| 12 Modification Date | 2015-06-12T 17:18:49 |

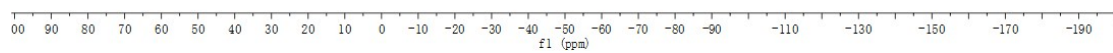

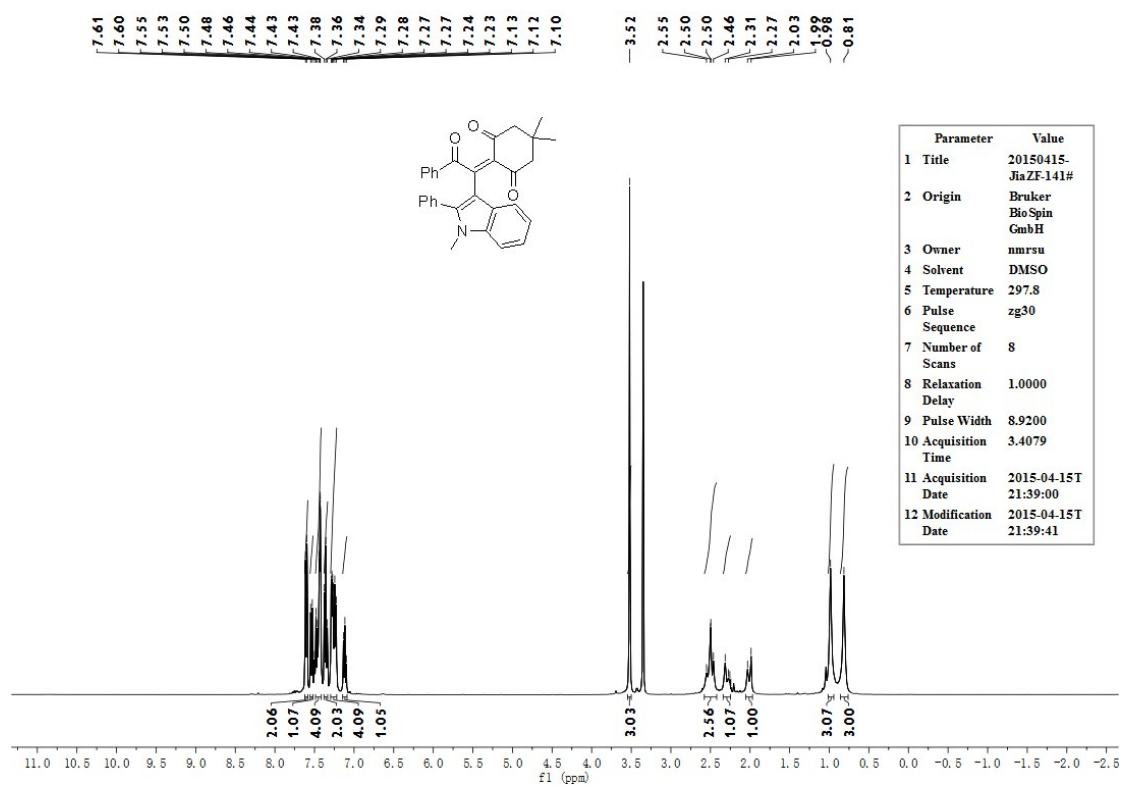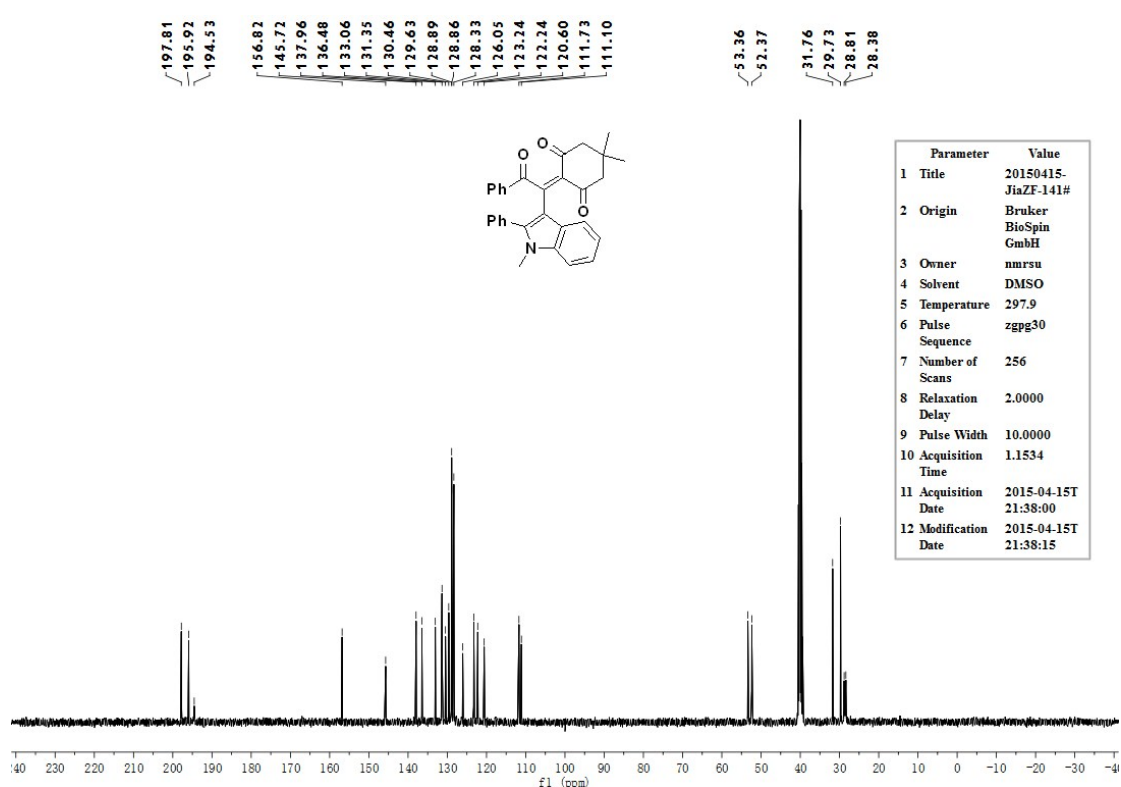

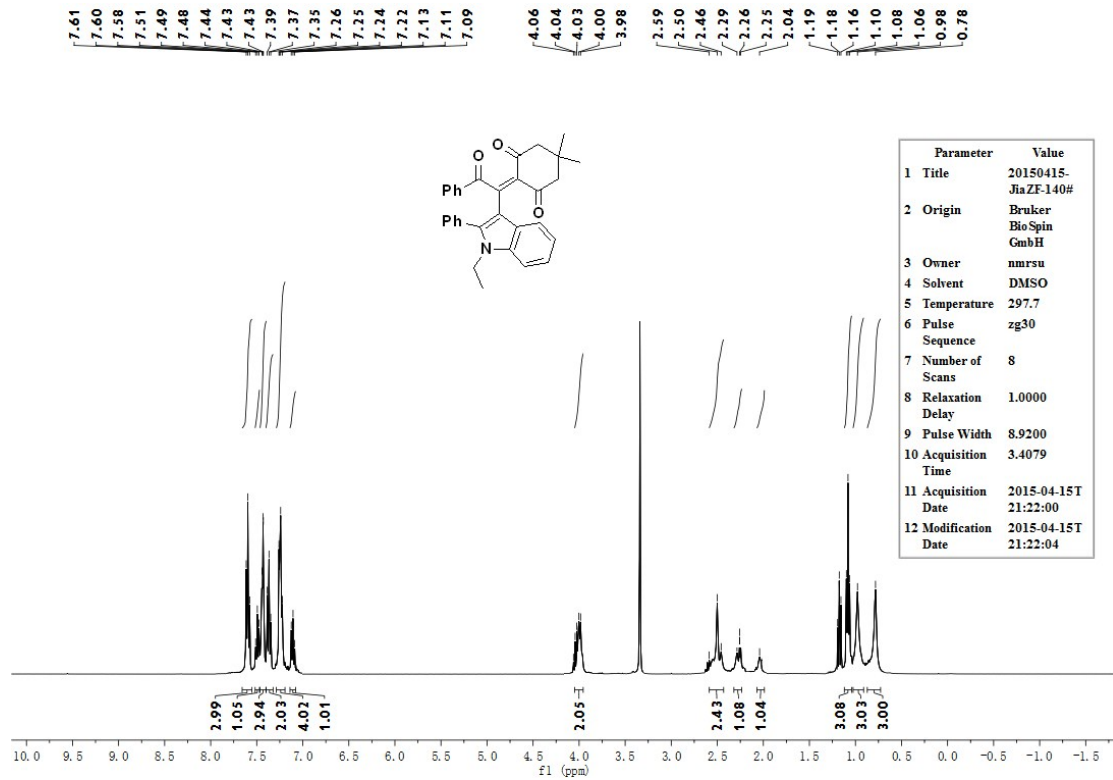

| Parameter            | Value                |
|----------------------|----------------------|
| 1 Title              | 20150415-JiaZF-140#  |
| 2 Origin             | Bruker BioSpin GmbH  |
| 3 Owner              | nmsru                |
| 4 Solvent            | DMSO                 |
| 5 Temperature        | 297.7                |
| 6 Pulse Sequence     | zg30                 |
| 7 Number of Scans    | 8                    |
| 8 Relaxation Delay   | 1.0000               |
| 9 Pulse Width        | 8.9200               |
| 10 Acquisition Time  | 3.4079               |
| 11 Acquisition Date  | 2015-04-15T 21:22:00 |
| 12 Modification Date | 2015-04-15T 21:22:04 |

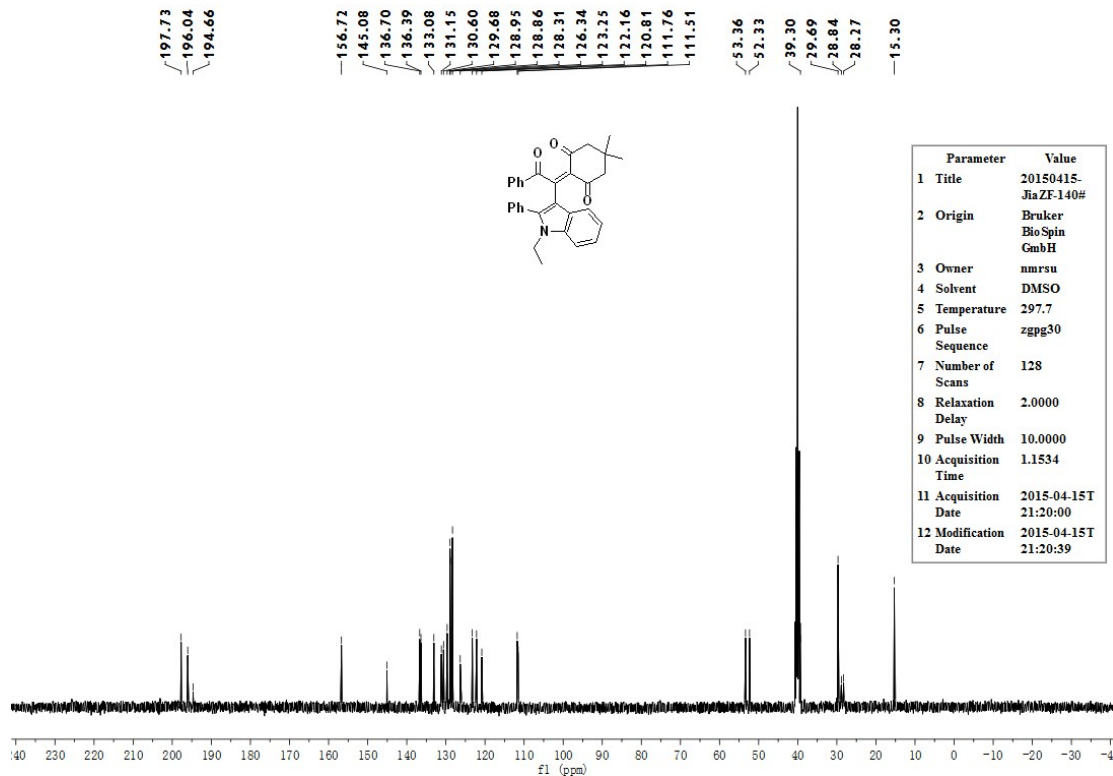

| Parameter            | Value                |
|----------------------|----------------------|
| 1 Title              | 20150415-JiaZF-140#  |
| 2 Origin             | Bruker BioSpin GmbH  |
| 3 Owner              | nmsru                |
| 4 Solvent            | DMSO                 |
| 5 Temperature        | 297.7                |
| 6 Pulse Sequence     | zgpg30               |
| 7 Number of Scans    | 128                  |
| 8 Relaxation Delay   | 2.0000               |
| 9 Pulse Width        | 10.0000              |
| 10 Acquisition Time  | 1.1534               |
| 11 Acquisition Date  | 2015-04-15T 21:20:00 |
| 12 Modification Date | 2015-04-15T 21:20:39 |

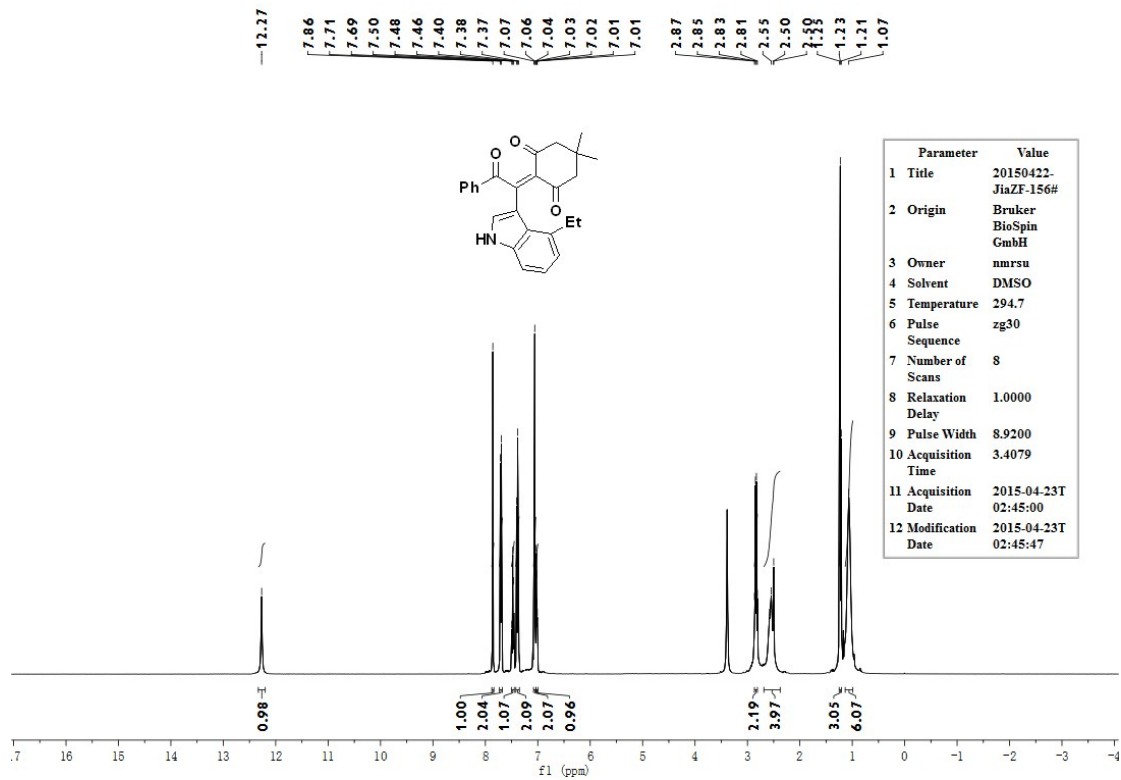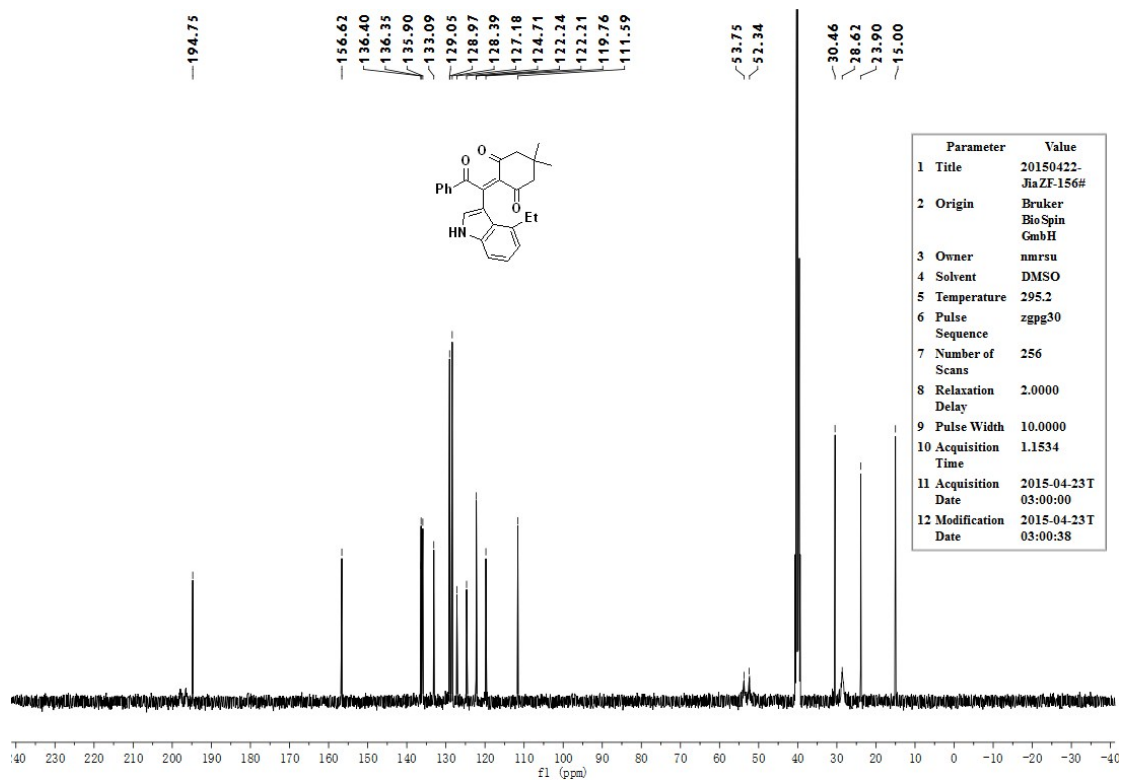

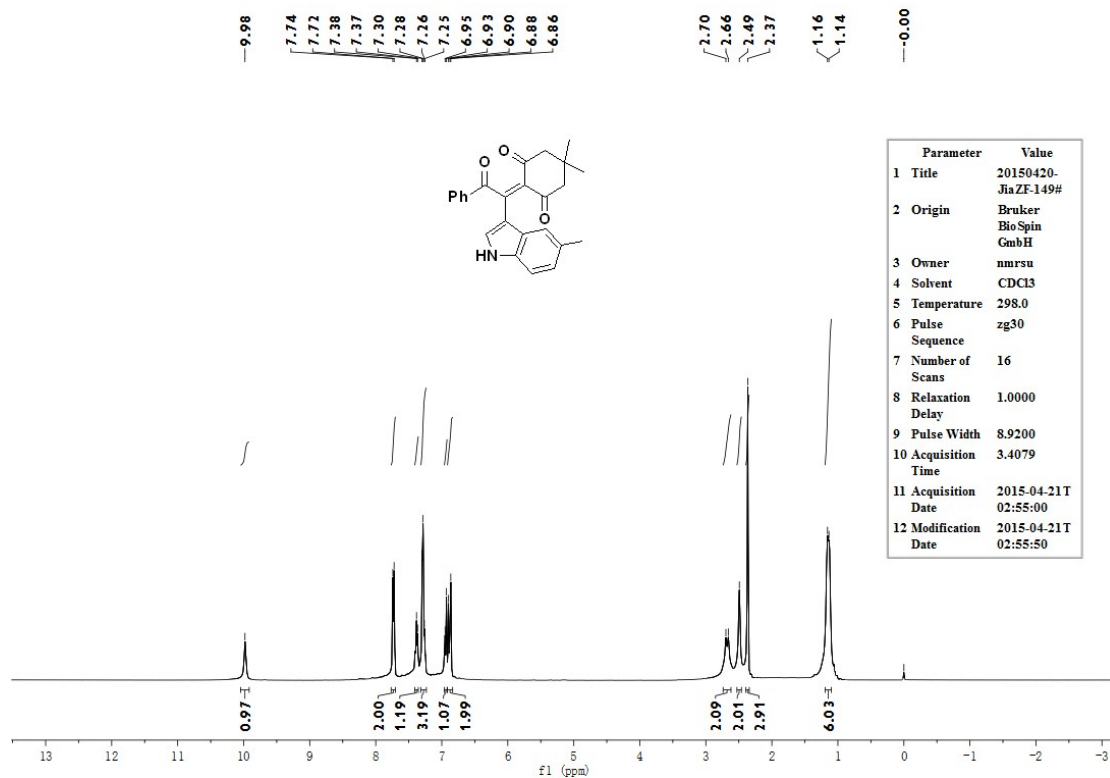

| Parameter            | Value                |
|----------------------|----------------------|
| 1 Title              | 20150420-JiaZF-149#  |
| 2 Origin             | Bruker BioSpin GmbH  |
| 3 Owner              | nmrsu                |
| 4 Solvent            | CDCl3                |
| 5 Temperature        | 298.0                |
| 6 Pulse Sequence     | zg30                 |
| 7 Number of Scans    | 16                   |
| 8 Relaxation Delay   | 1.0000               |
| 9 Pulse Width        | 8.9200               |
| 10 Acquisition Time  | 3.4079               |
| 11 Acquisition Date  | 2015-04-21T 02:55:00 |
| 12 Modification Date | 2015-04-21T 02:55:50 |

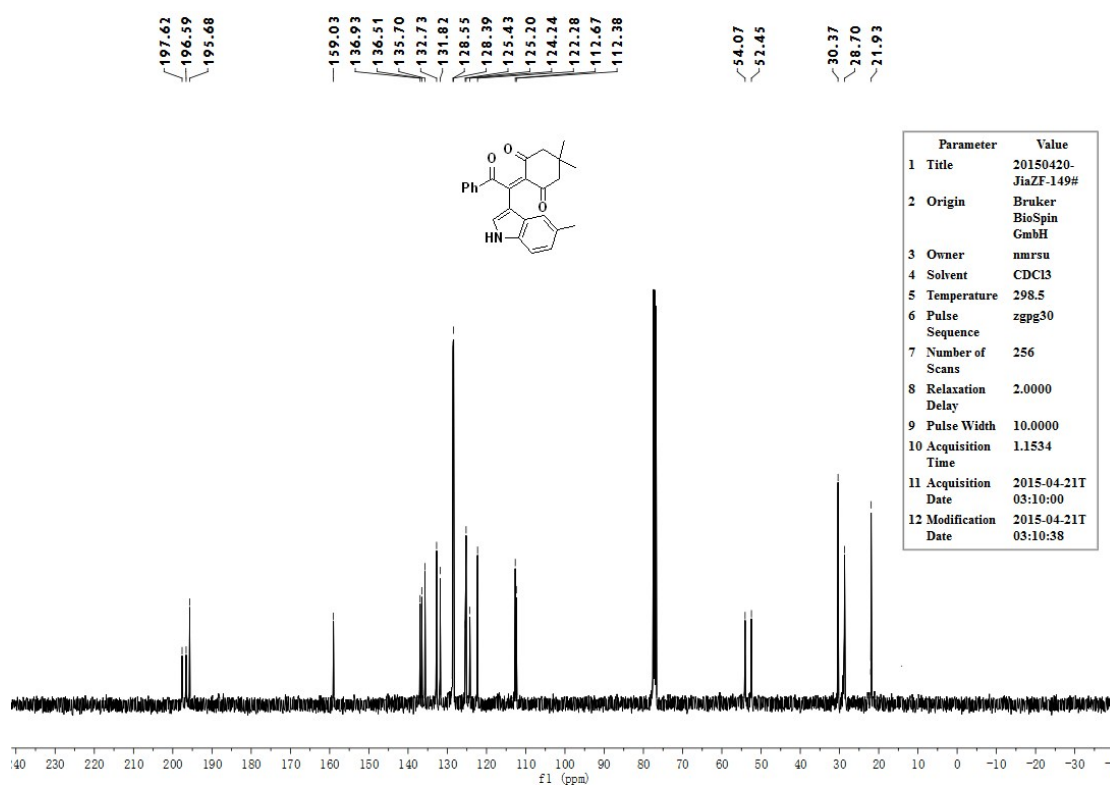

| Parameter            | Value                |
|----------------------|----------------------|
| 1 Title              | 20150420-JiaZF-149#  |
| 2 Origin             | Bruker BioSpin GmbH  |
| 3 Owner              | nmrsu                |
| 4 Solvent            | CDCl3                |
| 5 Temperature        | 298.5                |
| 6 Pulse Sequence     | zgpg30               |
| 7 Number of Scans    | 256                  |
| 8 Relaxation Delay   | 2.0000               |
| 9 Pulse Width        | 10.0000              |
| 10 Acquisition Time  | 1.1534               |
| 11 Acquisition Date  | 2015-04-21T 03:10:00 |
| 12 Modification Date | 2015-04-21T 03:10:38 |



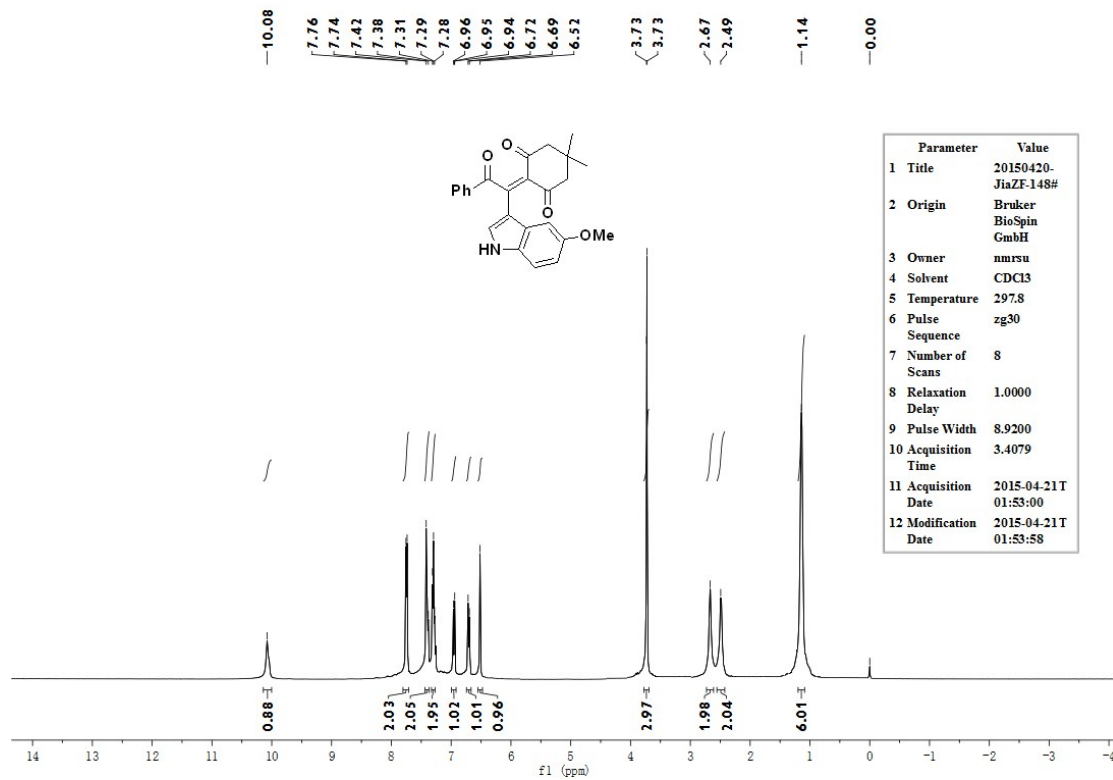

| Parameter            | Value                |
|----------------------|----------------------|
| 1 Title              | 20150420-JiaZF-148#  |
| 2 Origin             | Bruker BioSpin GmbH  |
| 3 Owner              | nmsu                 |
| 4 Solvent            | CDCl3                |
| 5 Temperature        | 297.8                |
| 6 Pulse Sequence     | zg30                 |
| 7 Number of Scans    | 8                    |
| 8 Relaxation Delay   | 1.0000               |
| 9 Pulse Width        | 8.9200               |
| 10 Acquisition Time  | 3.4079               |
| 11 Acquisition Date  | 2015-04-21T 01:53:00 |
| 12 Modification Date | 2015-04-21T 01:53:58 |

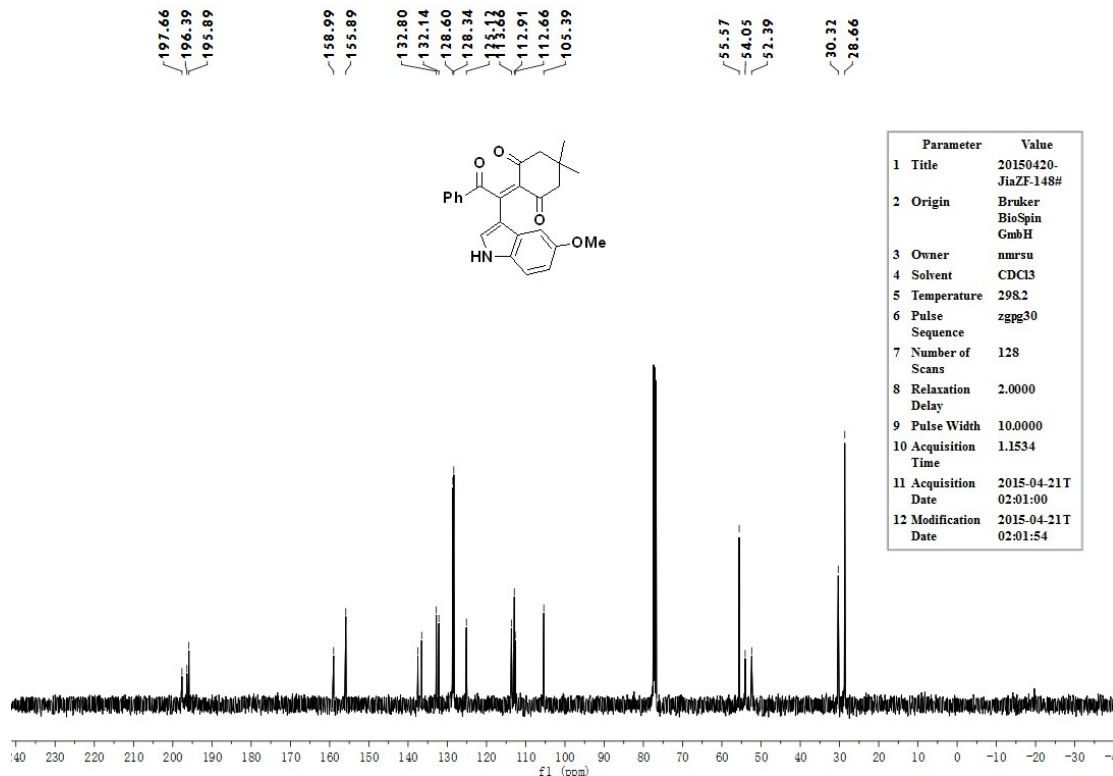

| Parameter            | Value                |
|----------------------|----------------------|
| 1 Title              | 20150420-JiaZF-148#  |
| 2 Origin             | Bruker BioSpin GmbH  |
| 3 Owner              | nmsu                 |
| 4 Solvent            | CDCl3                |
| 5 Temperature        | 298.2                |
| 6 Pulse Sequence     | zpgg30               |
| 7 Number of Scans    | 128                  |
| 8 Relaxation Delay   | 2.0000               |
| 9 Pulse Width        | 10.0000              |
| 10 Acquisition Time  | 1.1534               |
| 11 Acquisition Date  | 2015-04-21T 02:01:00 |
| 12 Modification Date | 2015-04-21T 02:01:54 |

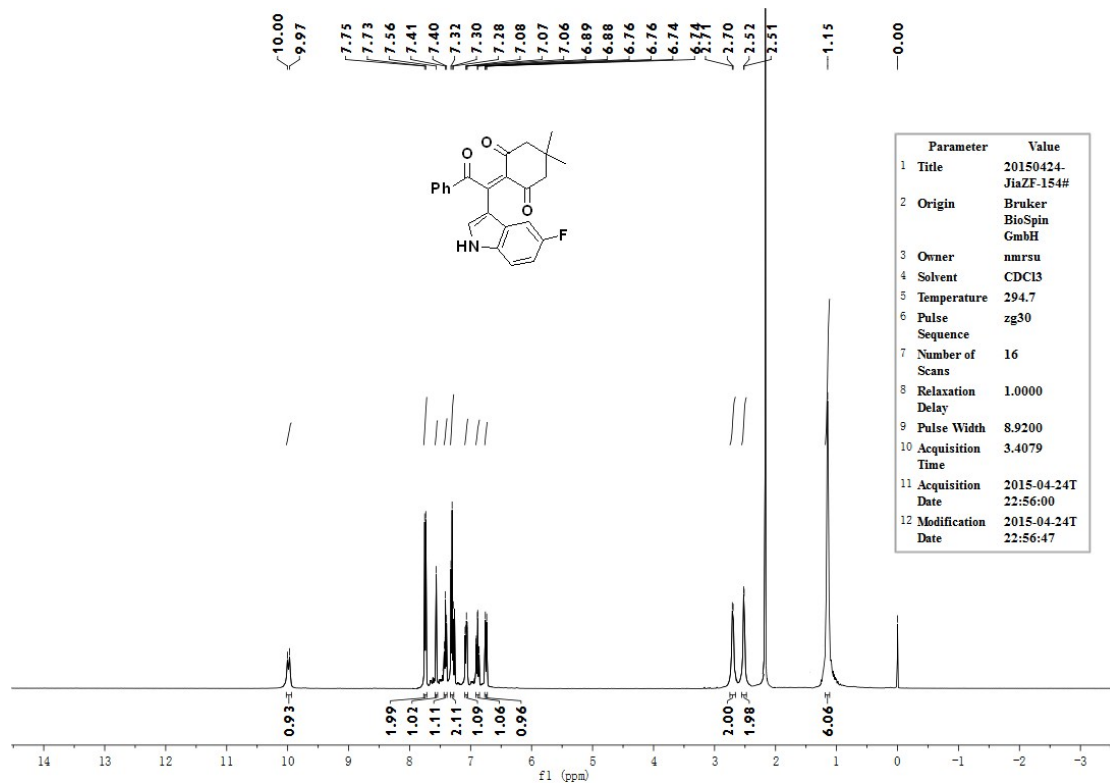

| Parameter            | Value                |
|----------------------|----------------------|
| 1 Title              | 20150424-JiaZF-154#  |
| 2 Origin             | Bruker BioSpin GmbH  |
| 3 Owner              | nmrsu                |
| 4 Solvent            | CDCl3                |
| 5 Temperature        | 294.7                |
| 6 Pulse Sequence     | zg30                 |
| 7 Number of Scans    | 16                   |
| 8 Relaxation Delay   | 1.0000               |
| 9 Pulse Width        | 8.9200               |
| 10 Acquisition Time  | 3.4079               |
| 11 Acquisition Date  | 2015-04-24T 22:56:00 |
| 12 Modification Date | 2015-04-24T 22:56:47 |

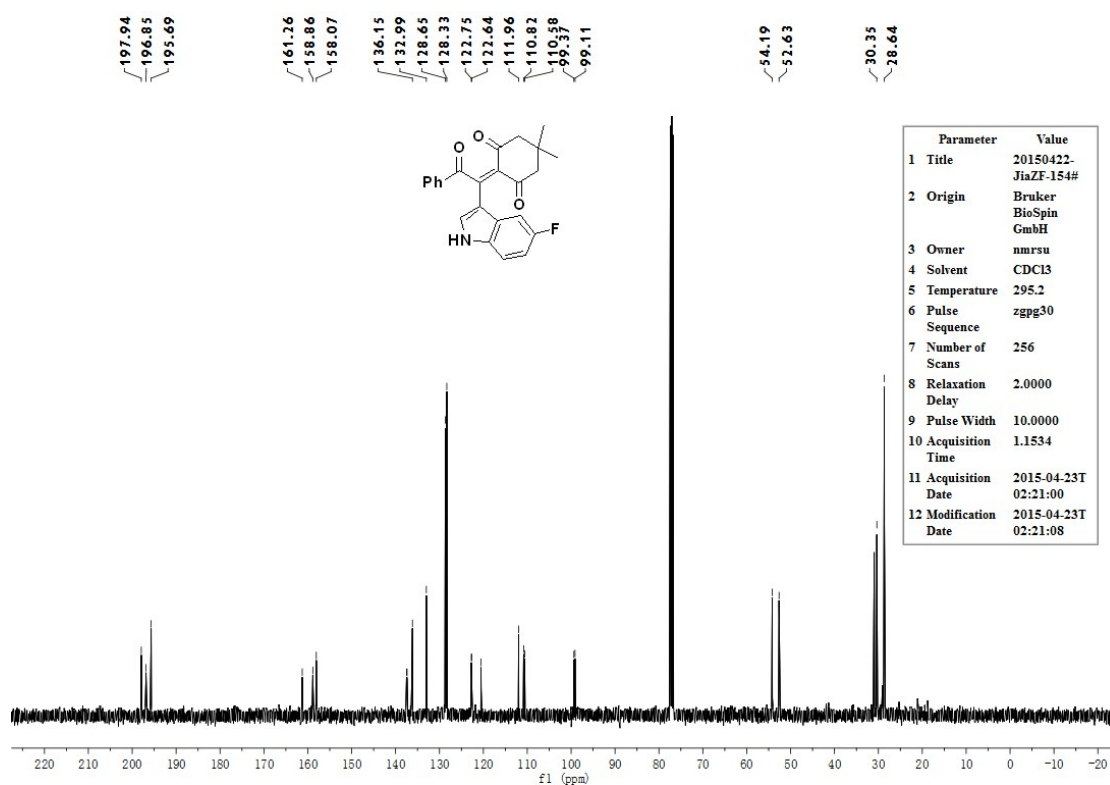

| Parameter            | Value                |
|----------------------|----------------------|
| 1 Title              | 20150422-JiaZF-154#  |
| 2 Origin             | Bruker BioSpin GmbH  |
| 3 Owner              | nmrsu                |
| 4 Solvent            | CDCl3                |
| 5 Temperature        | 295.2                |
| 6 Pulse Sequence     | zgpg30               |
| 7 Number of Scans    | 256                  |
| 8 Relaxation Delay   | 2.0000               |
| 9 Pulse Width        | 10.0000              |
| 10 Acquisition Time  | 1.1534               |
| 11 Acquisition Date  | 2015-04-23T 02:21:00 |
| 12 Modification Date | 2015-04-23T 02:21:08 |

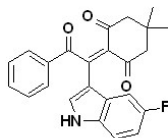

-118.34  
-118.35  
-118.36  
-118.38  
-118.40

| Parameter            | Value                |
|----------------------|----------------------|
| 1 Title              | 20150612-JiaZF-178#  |
| 2 Origin             | Bruker BioSpin GmbH  |
| 3 Owner              | nmsru                |
| 4 Solvent            | CDC13                |
| 5 Temperature        | 294.7                |
| 6 Pulse Sequence     | zgfgq                |
| 7 Number of Scans    | 64                   |
| 8 Relaxation Delay   | 1.5000               |
| 9 Pulse Width        | 14.0000              |
| 10 Acquisition Time  | 0.5767               |
| 11 Acquisition Date  | 2015-06-12T 17:23:00 |
| 12 Modification Date | 2015-06-12T 17:23:55 |

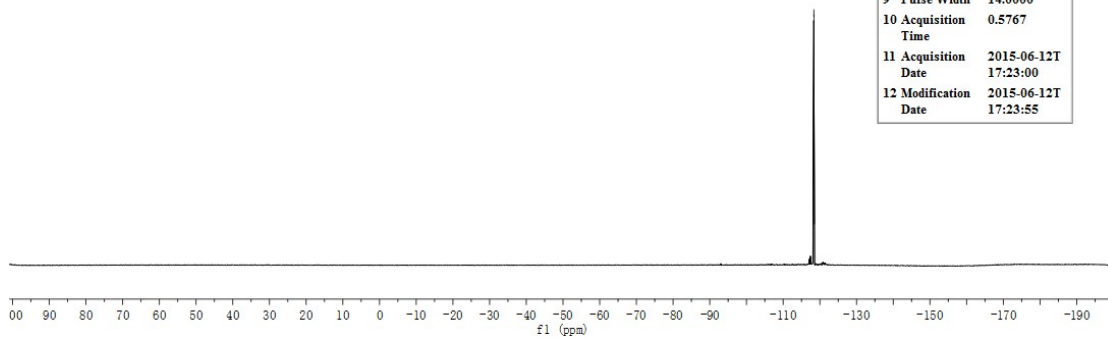

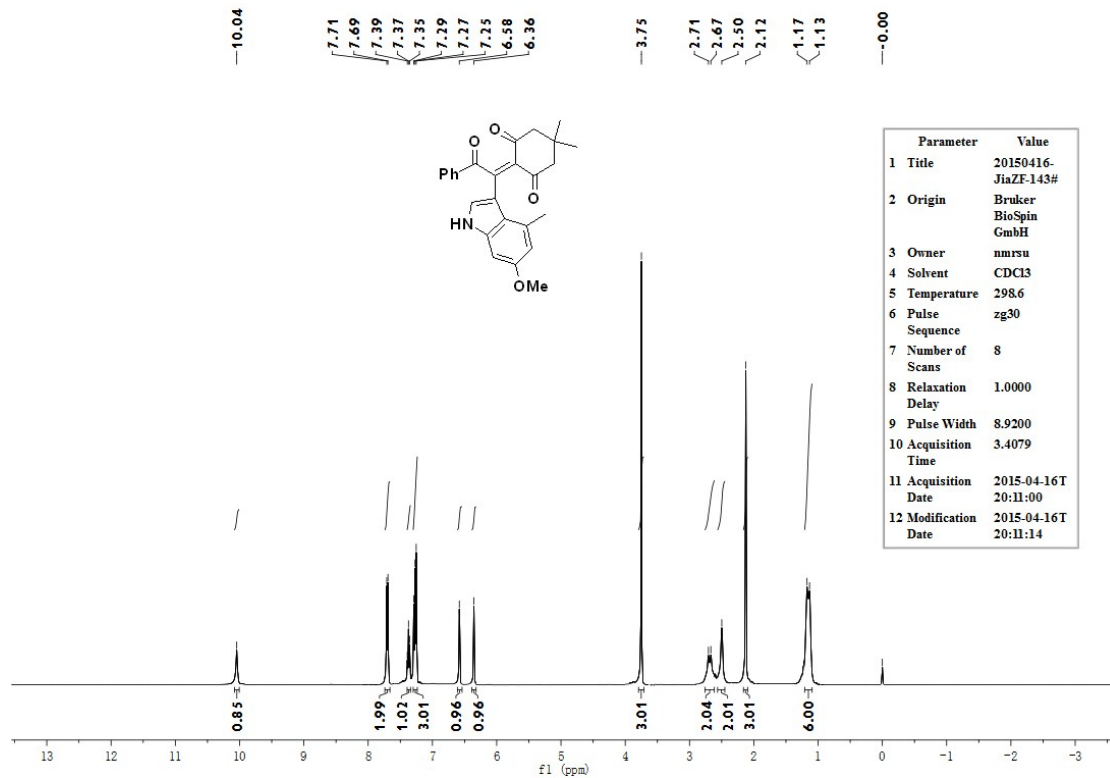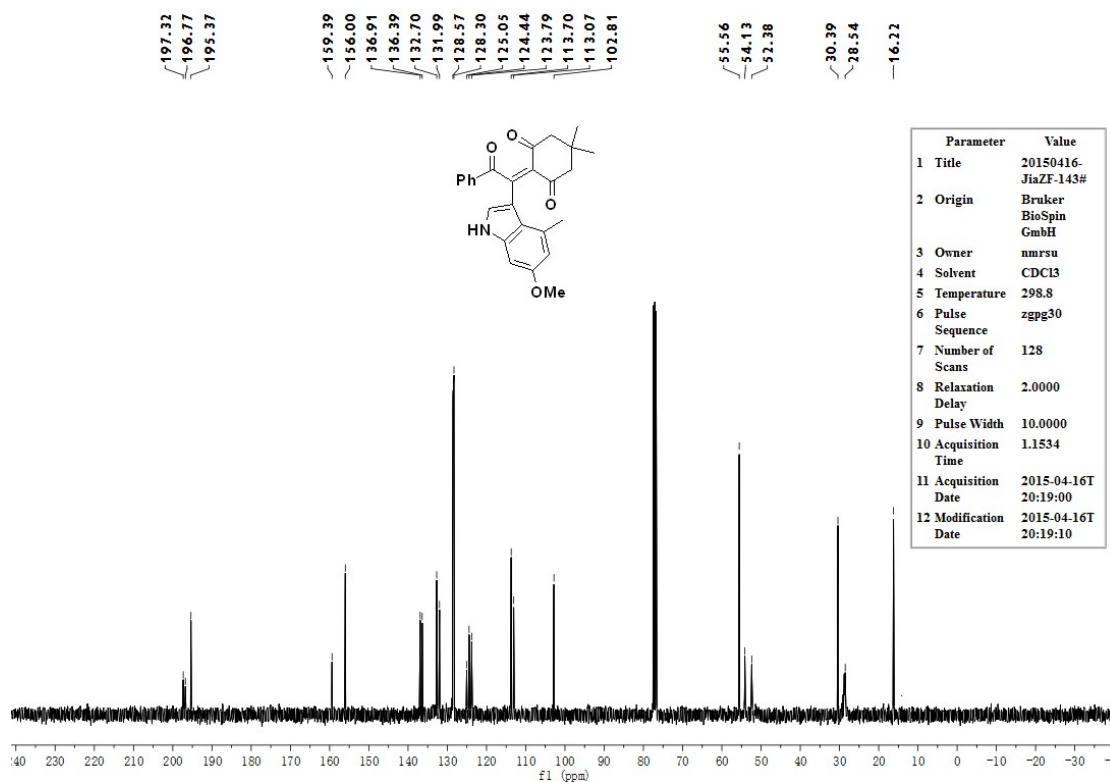

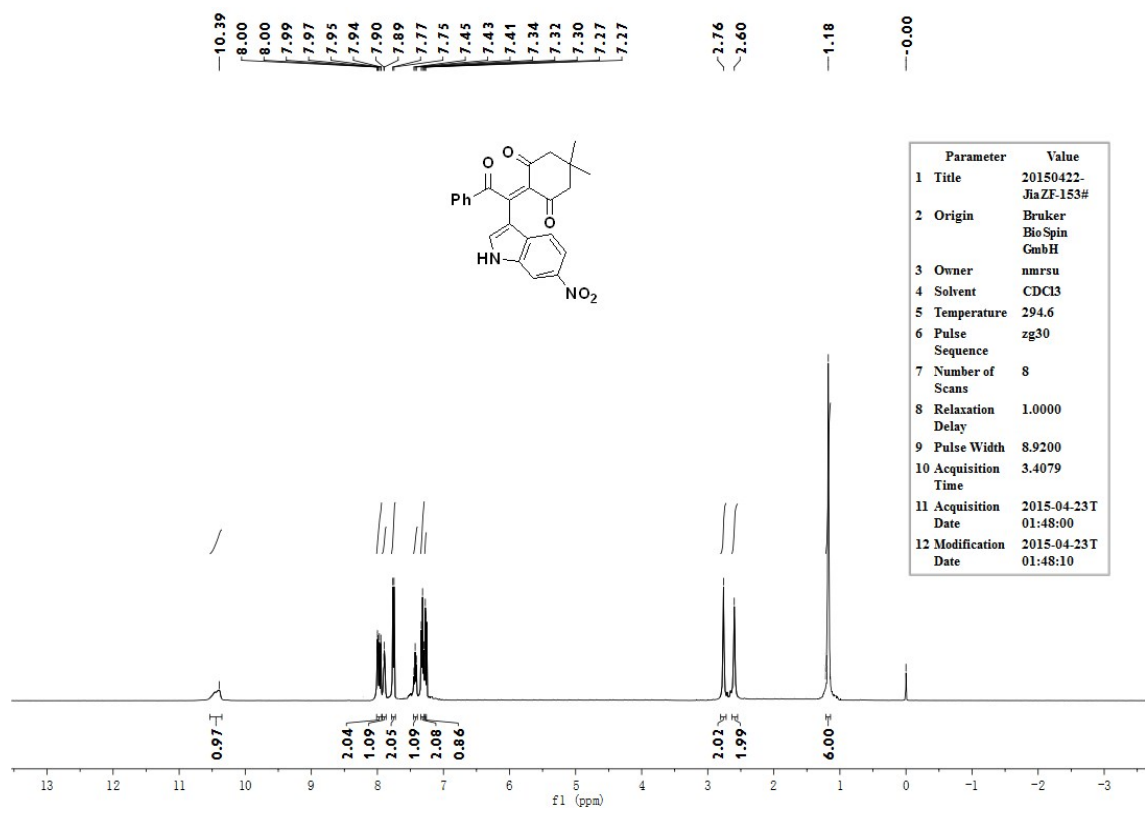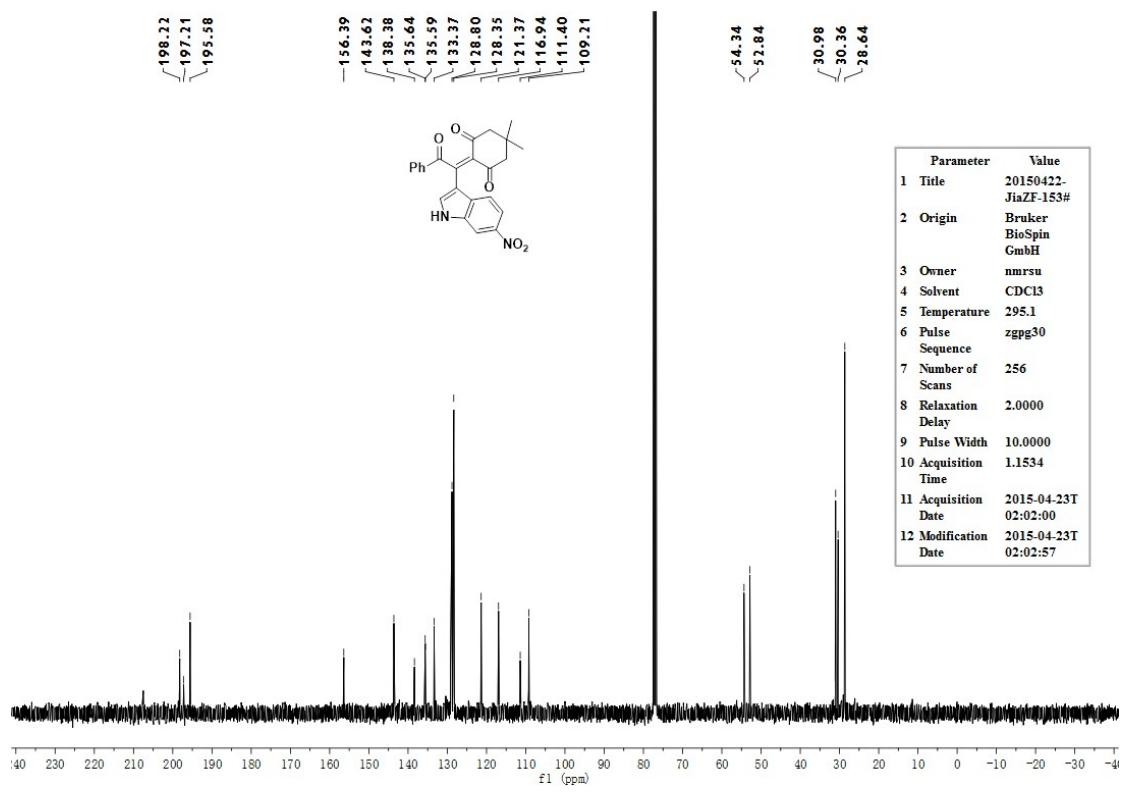

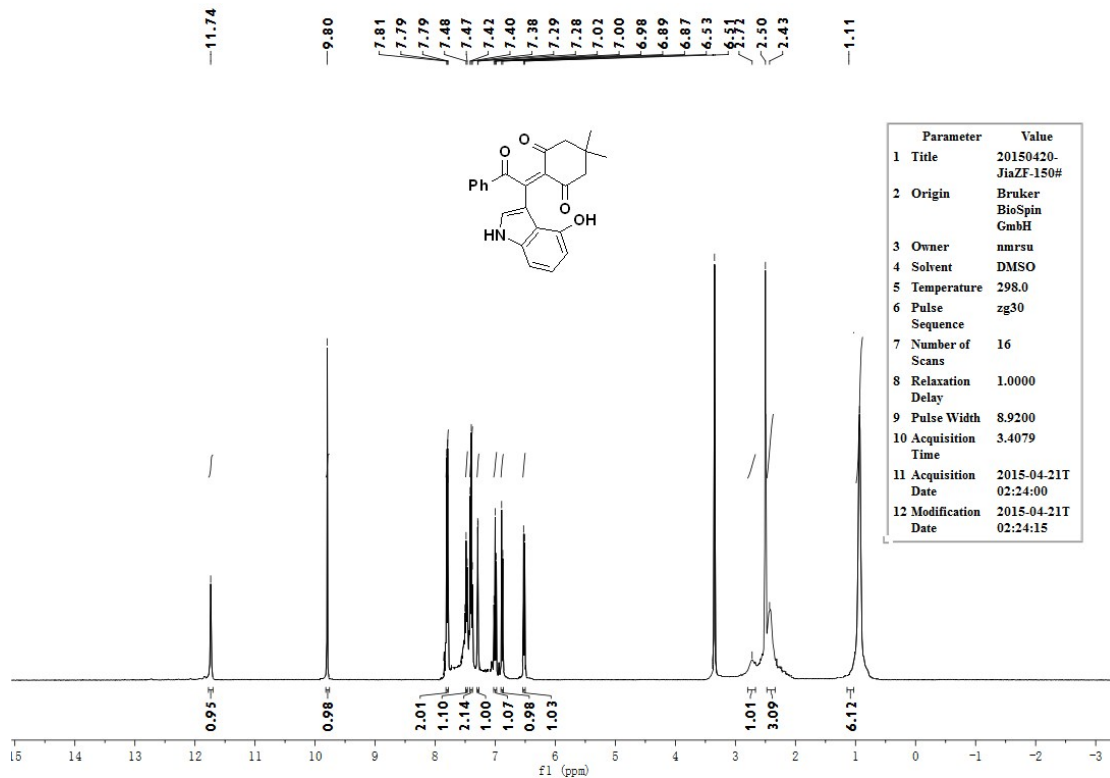

| Parameter            | Value               |
|----------------------|---------------------|
| 1 Title              | 20150420-JiaZF-150# |
| 2 Origin             | Bruker BioSpin GmbH |
| 3 Owner              | nmrsu               |
| 4 Solvent            | DMSO                |
| 5 Temperature        | 298.0               |
| 6 Pulse Sequence     | zg30                |
| 7 Number of Scans    | 16                  |
| 8 Relaxation Delay   | 1.0000              |
| 9 Pulse Width        | 8.9200              |
| 10 Acquisition Time  | 3.4079              |
| 11 Acquisition Date  | 2015-04-21T02:24:00 |
| 12 Modification Date | 2015-04-21T02:24:15 |

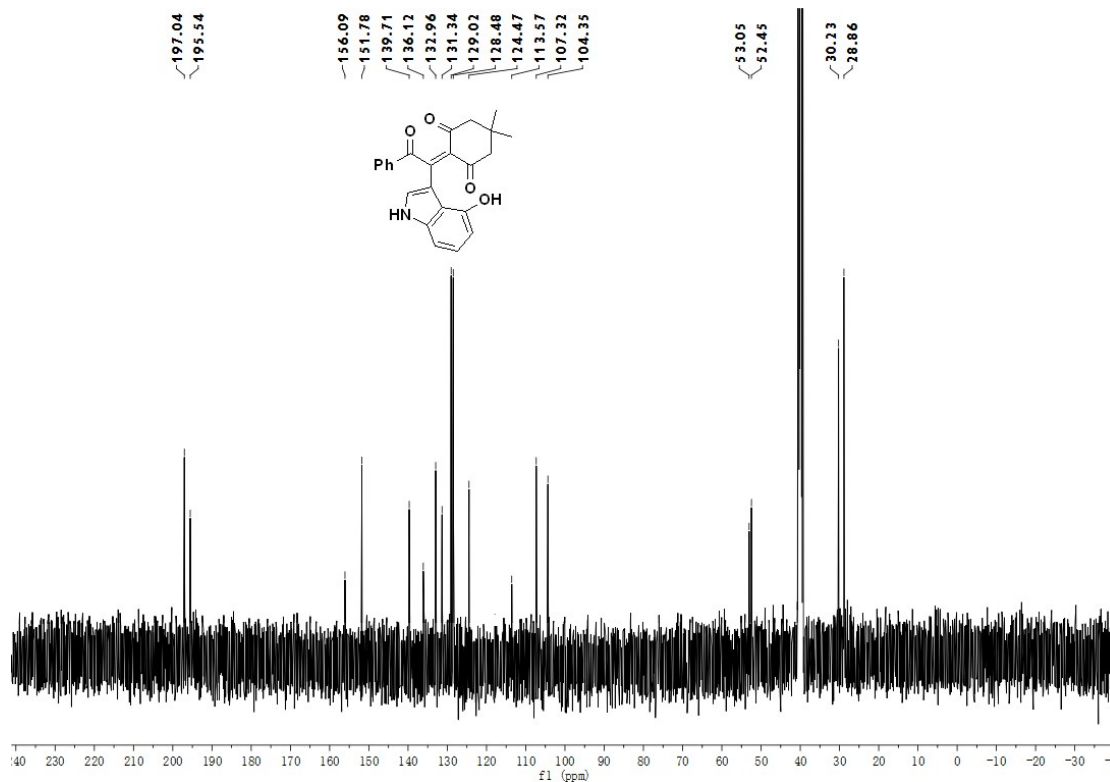

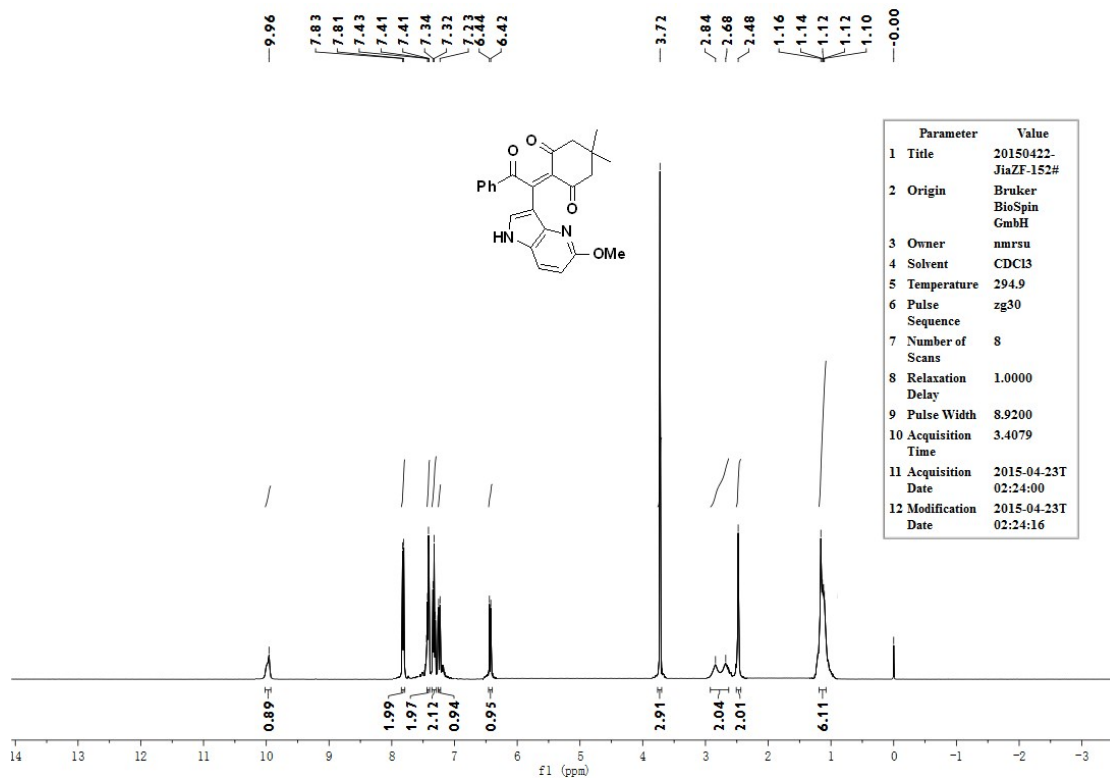

| Parameter            | Value               |
|----------------------|---------------------|
| 1 Title              | 20150422-JiaZF-152# |
| 2 Origin             | Bruker BioSpin GmbH |
| 3 Owner              | nmrsu               |
| 4 Solvent            | CDCl3               |
| 5 Temperature        | 294.9               |
| 6 Pulse Sequence     | zg30                |
| 7 Number of Scans    | 8                   |
| 8 Relaxation Delay   | 1.0000              |
| 9 Pulse Width        | 8.9200              |
| 10 Acquisition Time  | 3.4079              |
| 11 Acquisition Date  | 2015-04-23T02:24:00 |
| 12 Modification Date | 2015-04-23T02:24:16 |

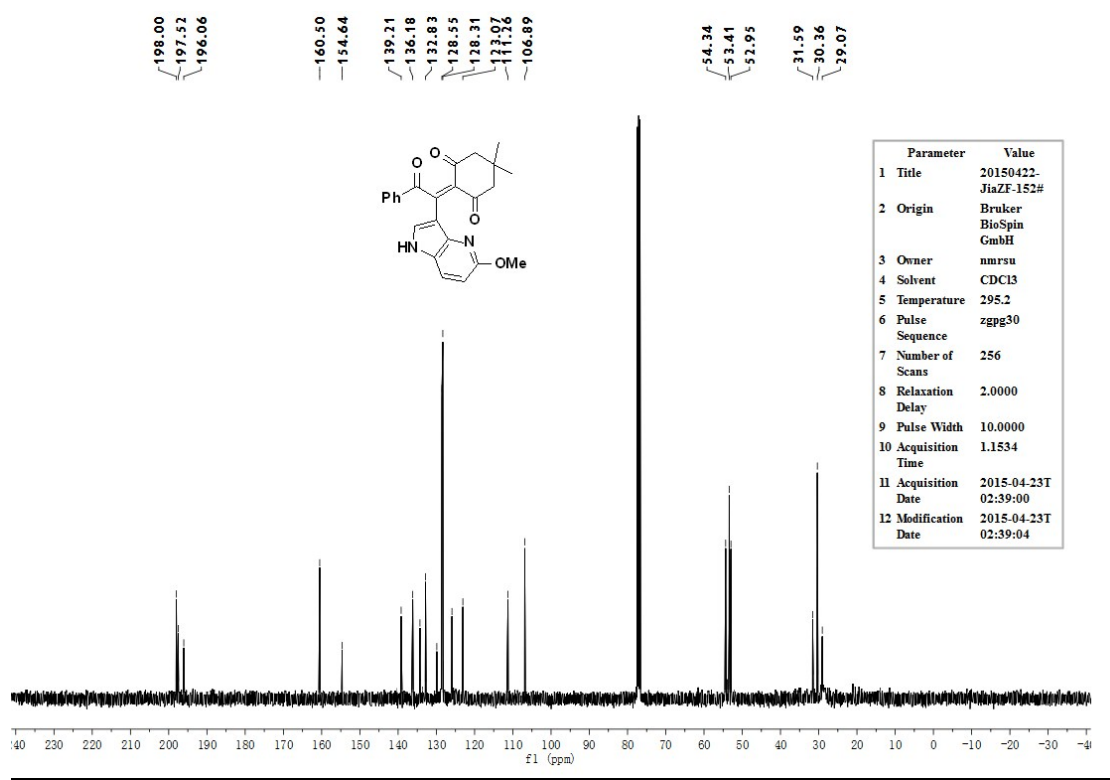

| Parameter            | Value               |
|----------------------|---------------------|
| 1 Title              | 20150422-JiaZF-152# |
| 2 Origin             | Bruker BioSpin GmbH |
| 3 Owner              | nmrsu               |
| 4 Solvent            | CDCl3               |
| 5 Temperature        | 295.2               |
| 6 Pulse Sequence     | zgpg30              |
| 7 Number of Scans    | 256                 |
| 8 Relaxation Delay   | 2.0000              |
| 9 Pulse Width        | 10.0000             |
| 10 Acquisition Time  | 1.1534              |
| 11 Acquisition Date  | 2015-04-23T02:39:00 |
| 12 Modification Date | 2015-04-23T02:39:04 |

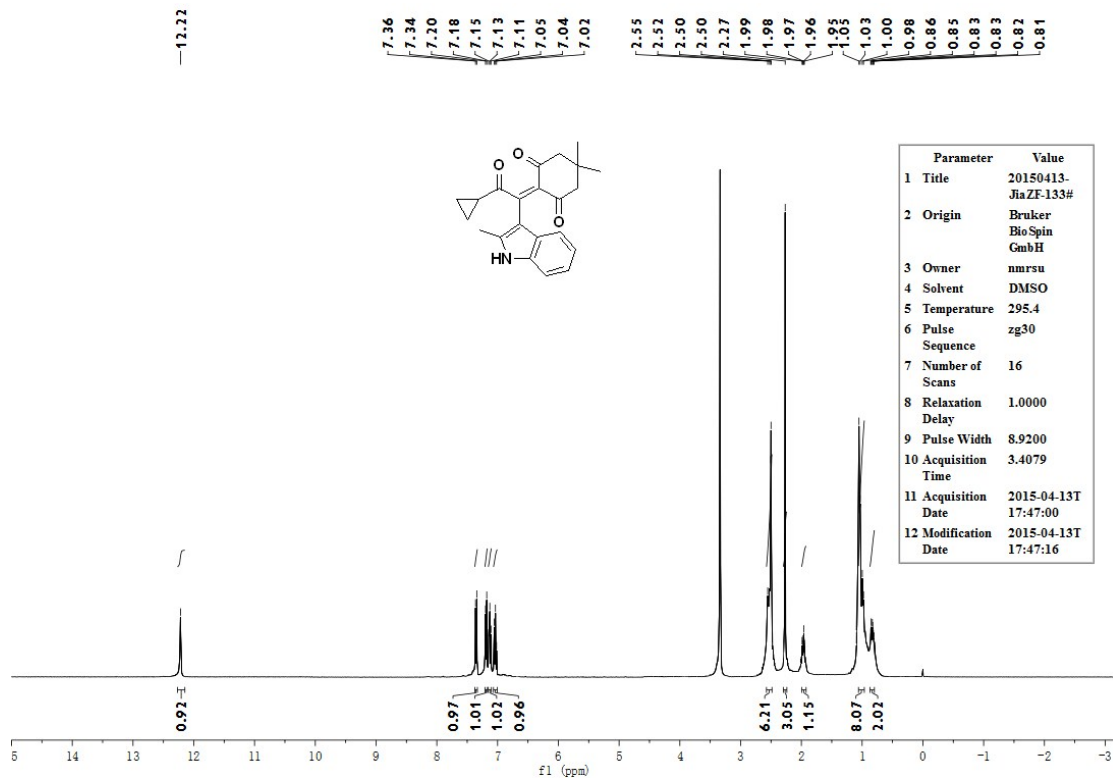

| Parameter            | Value                |
|----------------------|----------------------|
| 1 Title              | 20150413-JiaZF-133#  |
| 2 Origin             | Bruker BioSpin GmbH  |
| 3 Owner              | nmsru                |
| 4 Solvent            | DMSO                 |
| 5 Temperature        | 295.4                |
| 6 Pulse Sequence     | zg30                 |
| 7 Number of Scans    | 16                   |
| 8 Relaxation Delay   | 1.0000               |
| 9 Pulse Width        | 8.9200               |
| 10 Acquisition Time  | 3.4079               |
| 11 Acquisition Date  | 2015-04-13T 17:47:00 |
| 12 Modification Date | 2015-04-13T 17:47:16 |

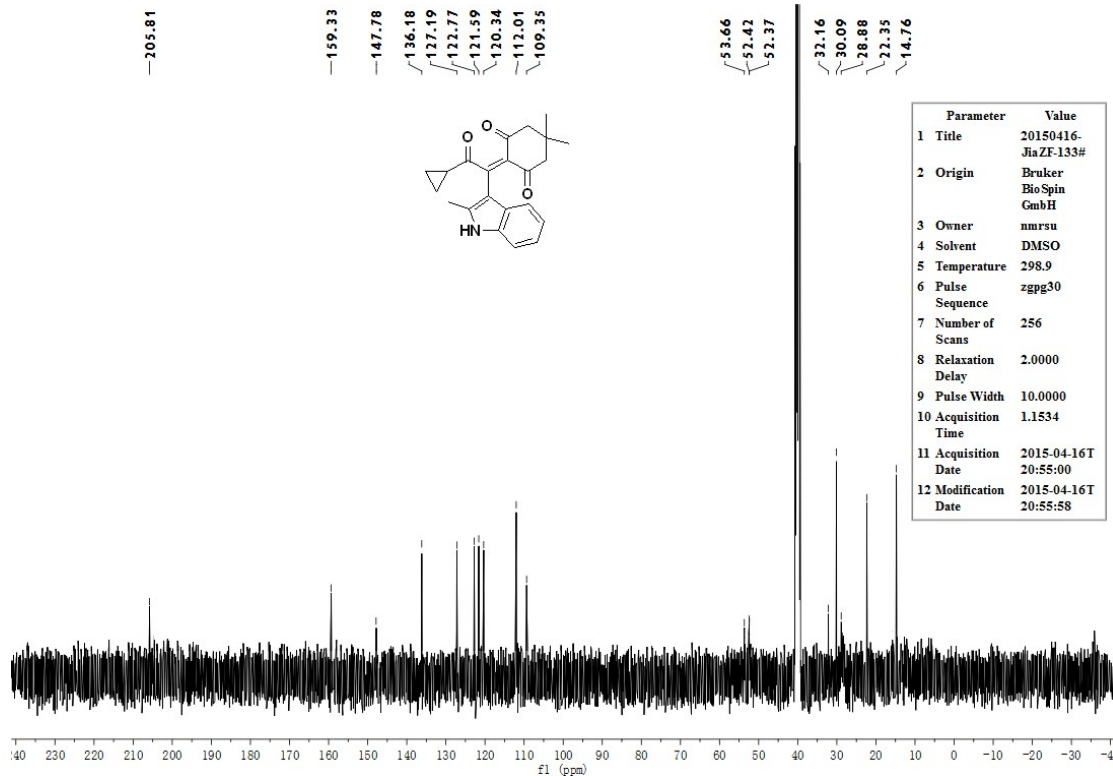

| Parameter            | Value                |
|----------------------|----------------------|
| 1 Title              | 20150416-JiaZF-133#  |
| 2 Origin             | Bruker BioSpin GmbH  |
| 3 Owner              | nmsru                |
| 4 Solvent            | DMSO                 |
| 5 Temperature        | 298.9                |
| 6 Pulse Sequence     | zgpg30               |
| 7 Number of Scans    | 256                  |
| 8 Relaxation Delay   | 2.0000               |
| 9 Pulse Width        | 10.0000              |
| 10 Acquisition Time  | 1.1534               |
| 11 Acquisition Date  | 2015-04-16T 20:55:00 |
| 12 Modification Date | 2015-04-16T 20:55:58 |



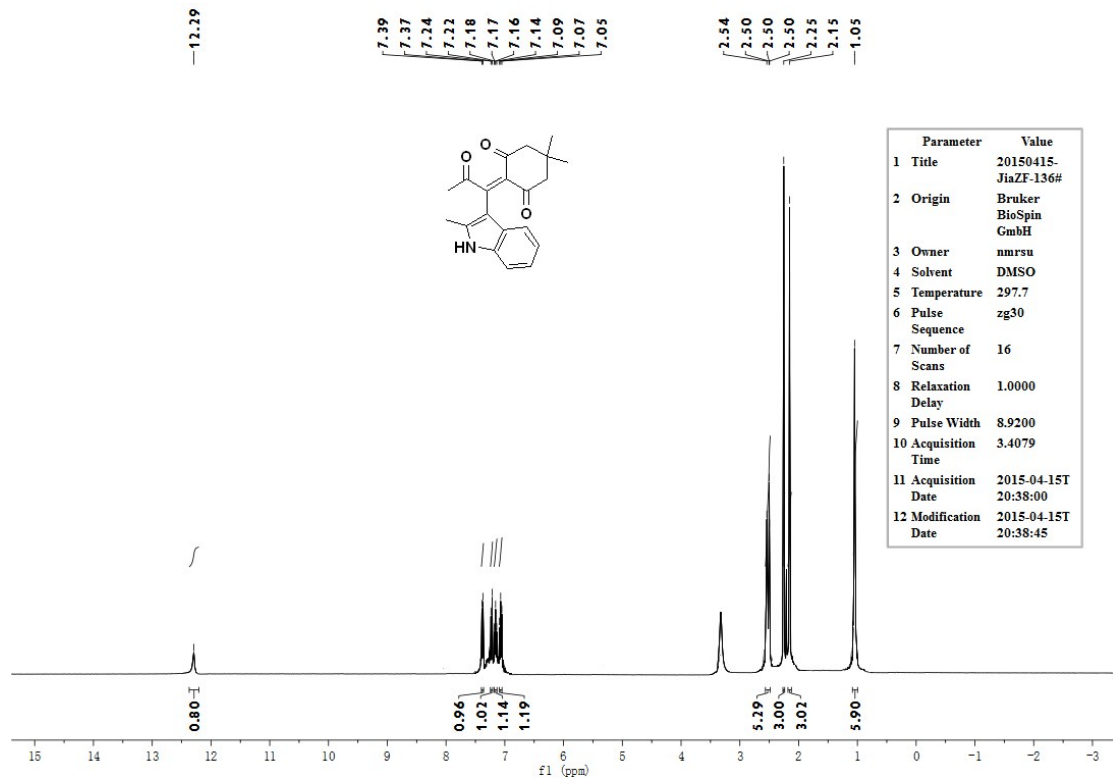

| Parameter            | Value                |
|----------------------|----------------------|
| 1 Title              | 20150415-JiaZF-136#  |
| 2 Origin             | Bruker BioSpin GmbH  |
| 3 Owner              | nrrsu                |
| 4 Solvent            | DMSO                 |
| 5 Temperature        | 297.7                |
| 6 Pulse Sequence     | zg30                 |
| 7 Number of Scans    | 16                   |
| 8 Relaxation Delay   | 1.0000               |
| 9 Pulse Width        | 8.9200               |
| 10 Acquisition Time  | 3.4079               |
| 11 Acquisition Date  | 2015-04-15T 20:38:00 |
| 12 Modification Date | 2015-04-15T 20:38:45 |

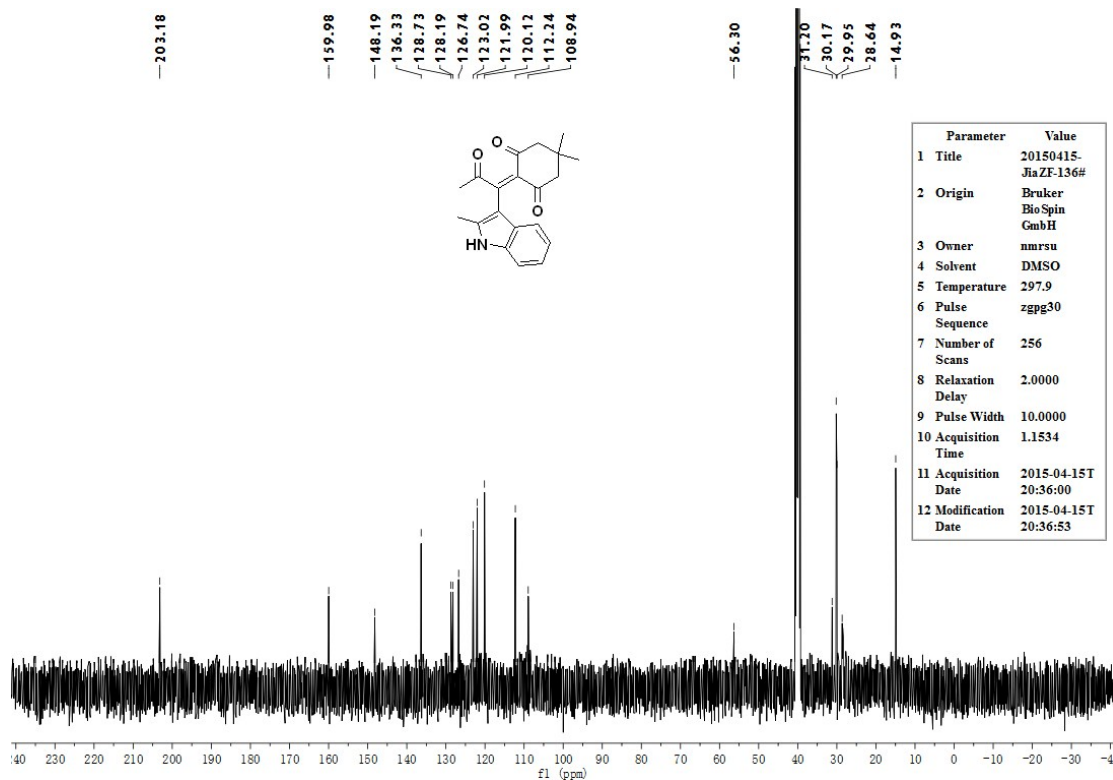

| Parameter            | Value                |
|----------------------|----------------------|
| 1 Title              | 20150415-JiaZF-136#  |
| 2 Origin             | Bruker BioSpin GmbH  |
| 3 Owner              | nrrsu                |
| 4 Solvent            | DMSO                 |
| 5 Temperature        | 297.9                |
| 6 Pulse Sequence     | zgpg30               |
| 7 Number of Scans    | 256                  |
| 8 Relaxation Delay   | 2.0000               |
| 9 Pulse Width        | 10.0000              |
| 10 Acquisition Time  | 1.1534               |
| 11 Acquisition Date  | 2015-04-15T 20:36:00 |
| 12 Modification Date | 2015-04-15T 20:36:53 |

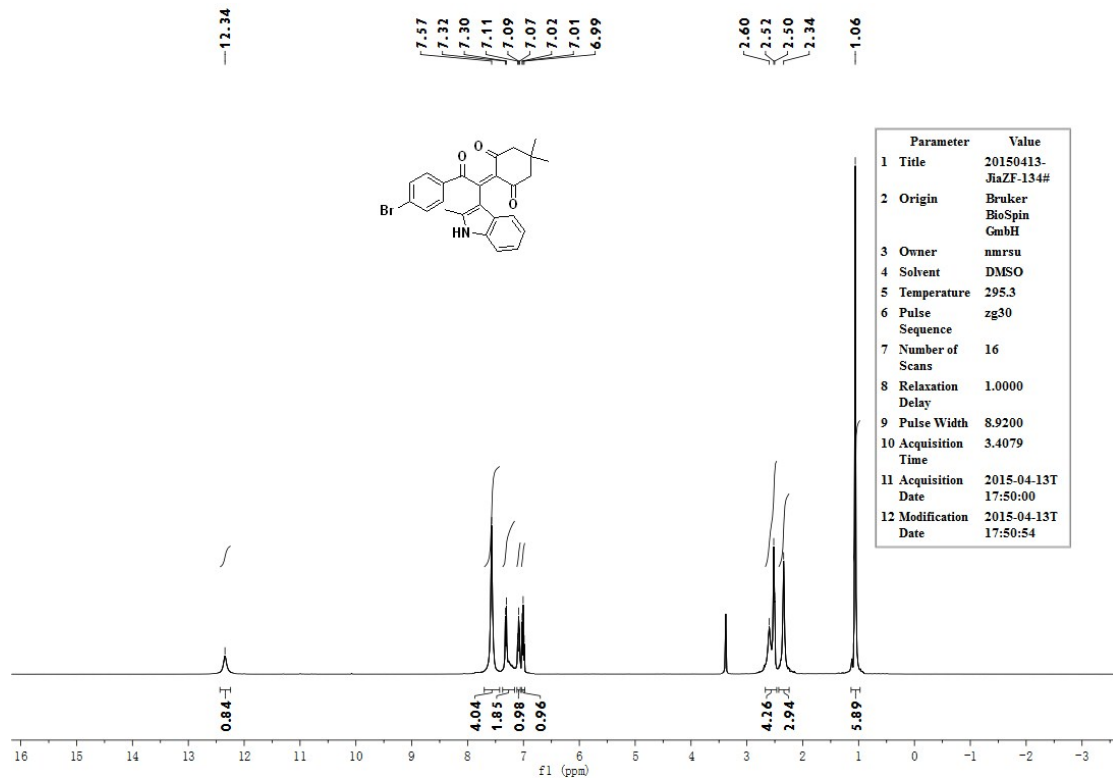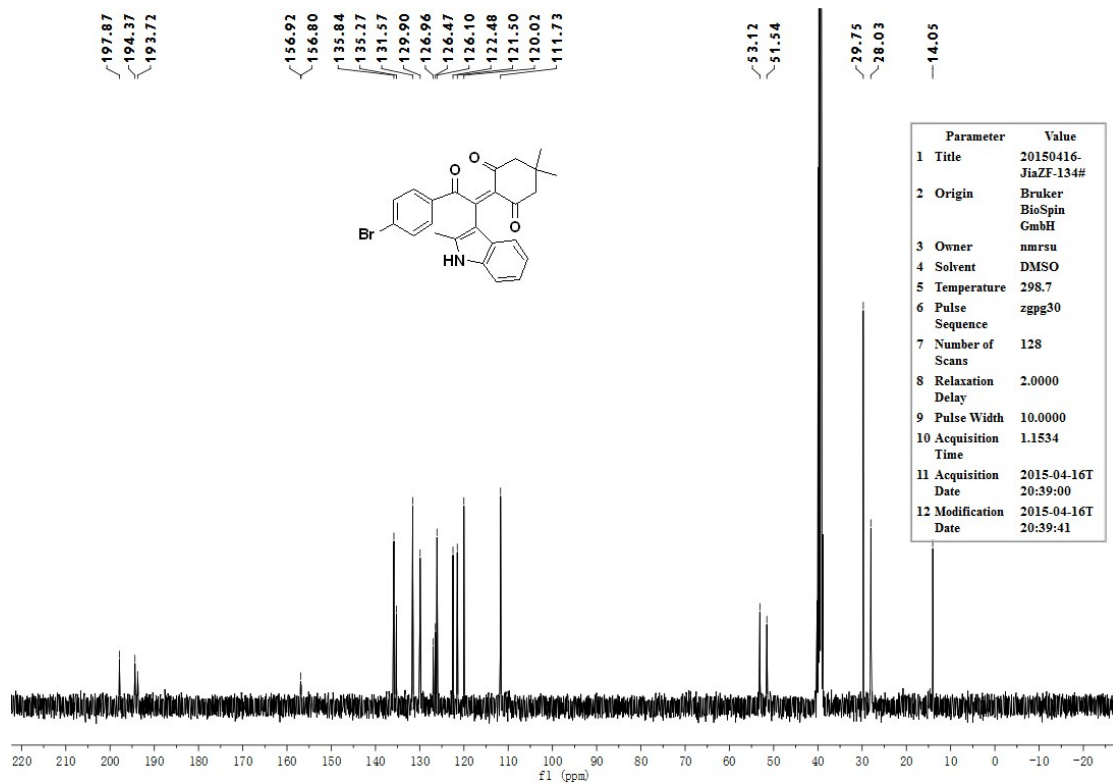

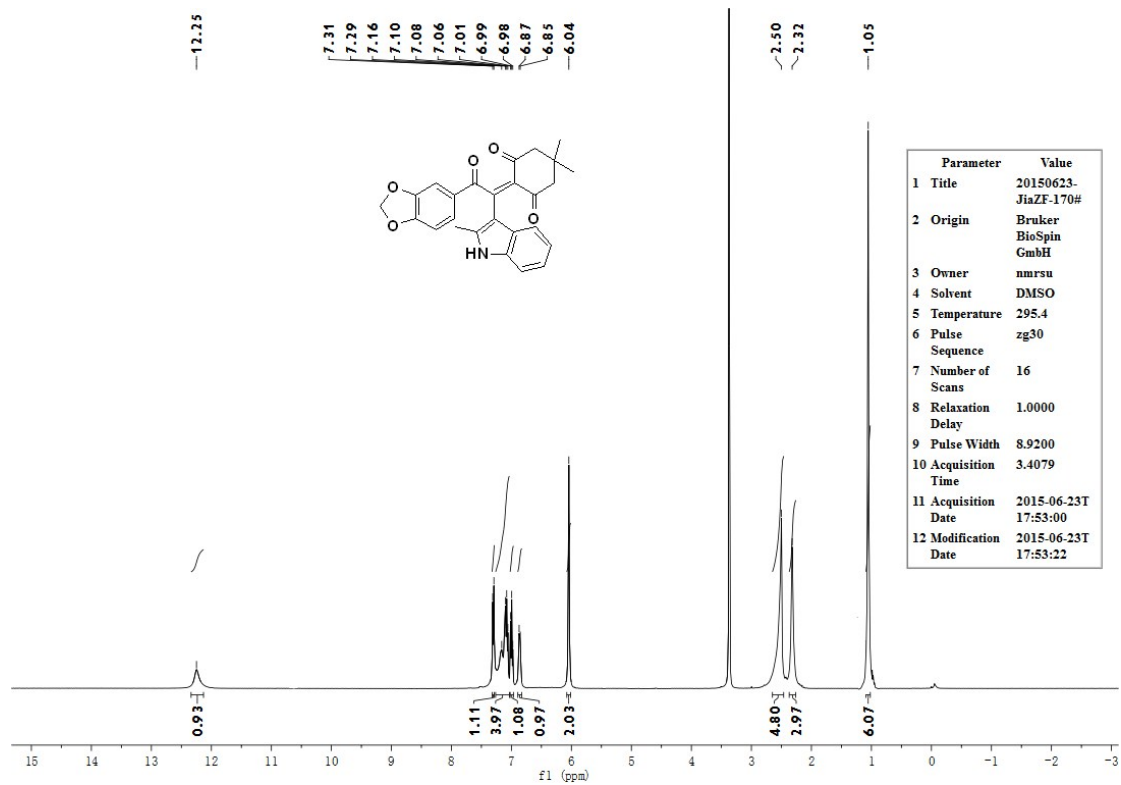

| Parameter            | Value               |
|----------------------|---------------------|
| 1 Title              | 20150623-JiaZF-170# |
| 2 Origin             | Bruker BioSpin GmbH |
| 3 Owner              | nmrsu               |
| 4 Solvent            | DMSO                |
| 5 Temperature        | 295.4               |
| 6 Pulse Sequence     | zg30                |
| 7 Number of Scans    | 16                  |
| 8 Relaxation Delay   | 1.0000              |
| 9 Pulse Width        | 8.9200              |
| 10 Acquisition Time  | 3.4079              |
| 11 Acquisition Date  | 2015-06-23T17:53:00 |
| 12 Modification Date | 2015-06-23T17:53:22 |

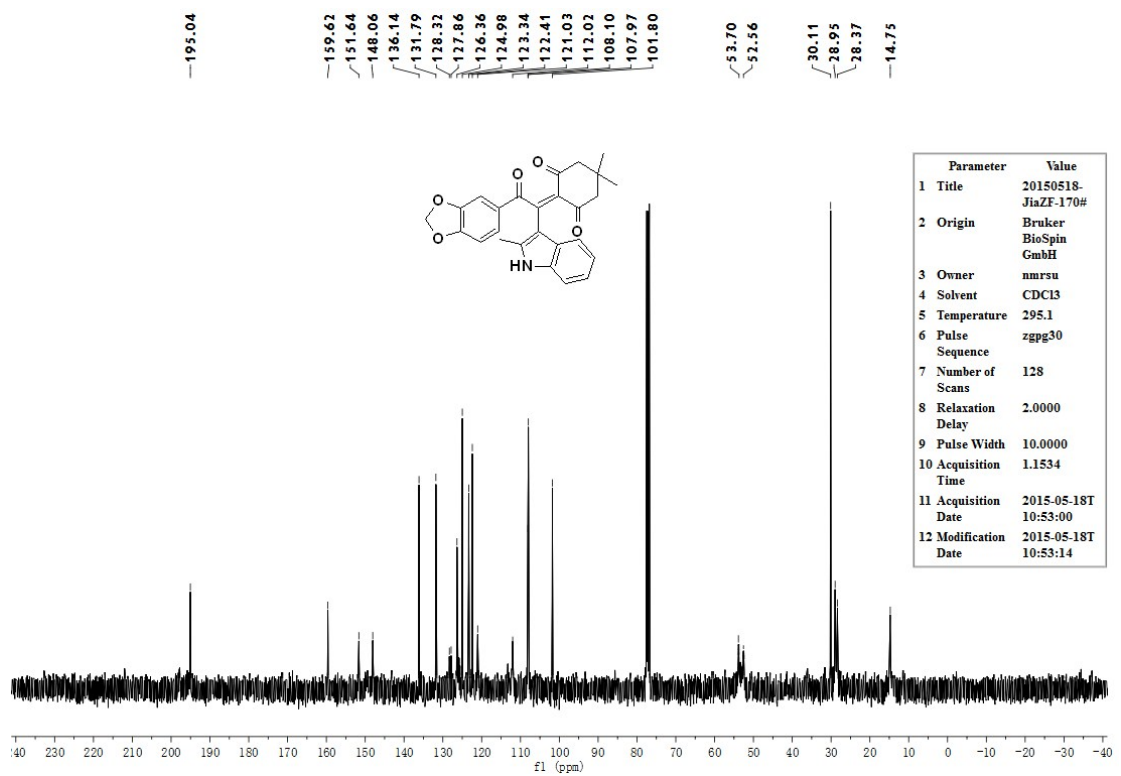

| Parameter            | Value               |
|----------------------|---------------------|
| 1 Title              | 20150518-JiaZF-170# |
| 2 Origin             | Bruker BioSpin GmbH |
| 3 Owner              | nmrsu               |
| 4 Solvent            | CDCl3               |
| 5 Temperature        | 295.1               |
| 6 Pulse Sequence     | zgpg30              |
| 7 Number of Scans    | 128                 |
| 8 Relaxation Delay   | 2.0000              |
| 9 Pulse Width        | 10.0000             |
| 10 Acquisition Time  | 1.1534              |
| 11 Acquisition Date  | 2015-05-18T10:53:00 |
| 12 Modification Date | 2015-05-18T10:53:14 |

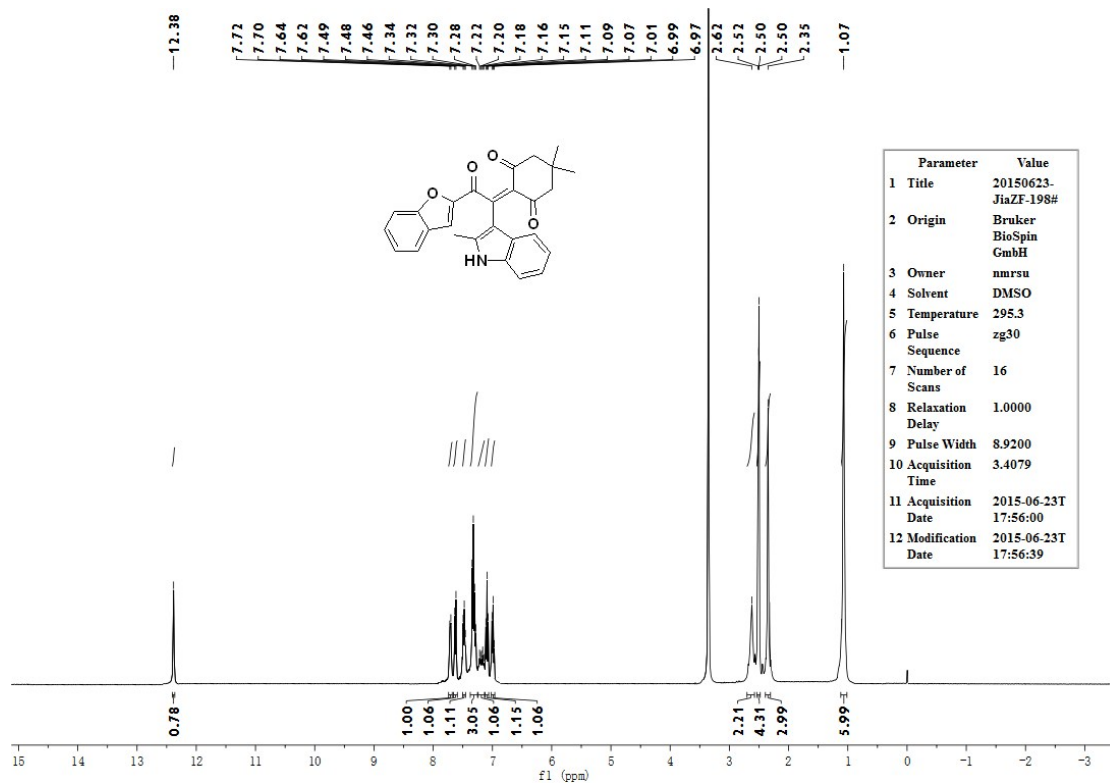

| Parameter            | Value                |
|----------------------|----------------------|
| 1 Title              | 20150623-JiaZF-198#  |
| 2 Origin             | Bruker BioSpin GmbH  |
| 3 Owner              | nmrsu                |
| 4 Solvent            | DMSO                 |
| 5 Temperature        | 295.3                |
| 6 Pulse Sequence     | zg30                 |
| 7 Number of Scans    | 16                   |
| 8 Relaxation Delay   | 1.0000               |
| 9 Pulse Width        | 8.9200               |
| 10 Acquisition Time  | 3.4079               |
| 11 Acquisition Date  | 2015-06-23T 17:56:00 |
| 12 Modification Date | 2015-06-23T 17:56:39 |

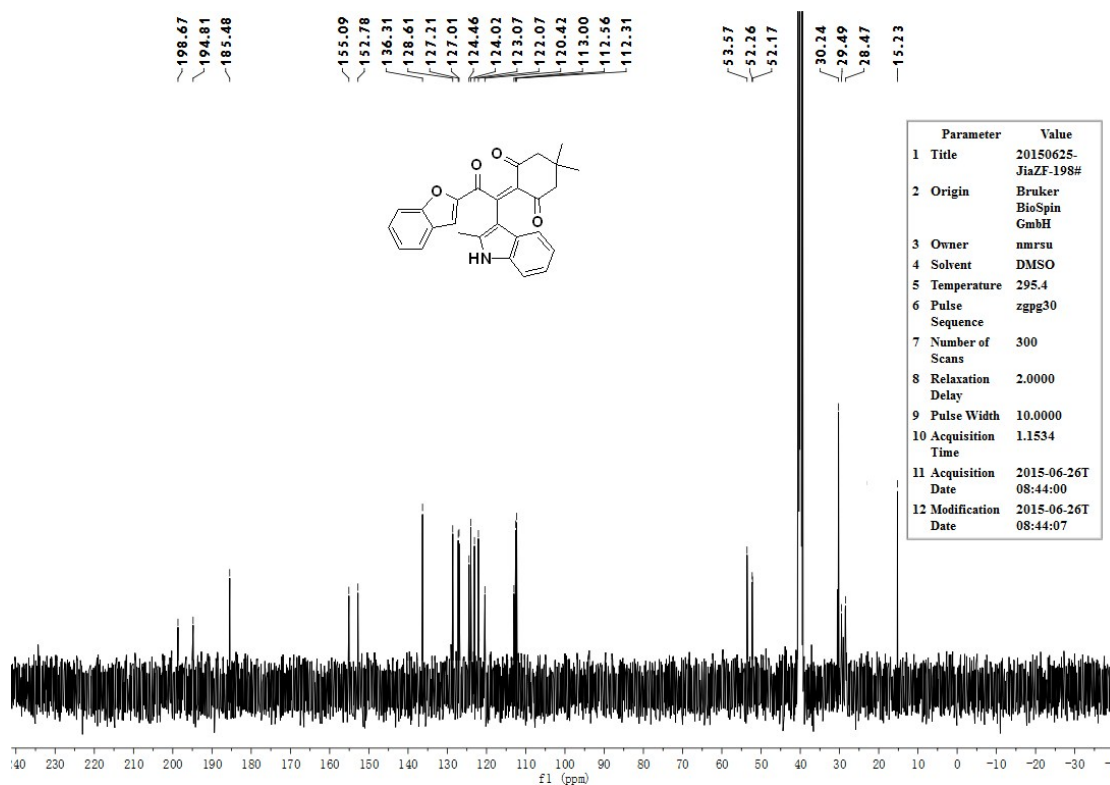

| Parameter            | Value                |
|----------------------|----------------------|
| 1 Title              | 20150625-JiaZF-198#  |
| 2 Origin             | Bruker BioSpin GmbH  |
| 3 Owner              | nmrsu                |
| 4 Solvent            | DMSO                 |
| 5 Temperature        | 295.4                |
| 6 Pulse Sequence     | zgpg30               |
| 7 Number of Scans    | 300                  |
| 8 Relaxation Delay   | 2.0000               |
| 9 Pulse Width        | 10.0000              |
| 10 Acquisition Time  | 1.1534               |
| 11 Acquisition Date  | 2015-06-26T 08:44:00 |
| 12 Modification Date | 2015-06-26T 08:44:07 |

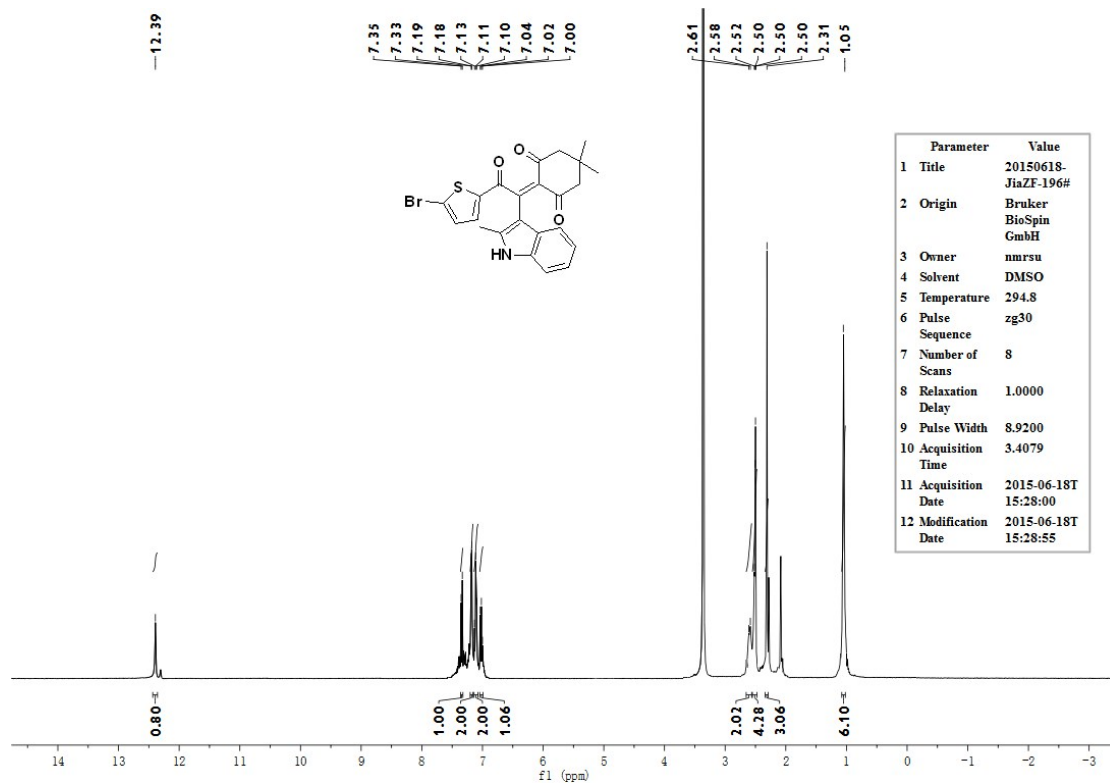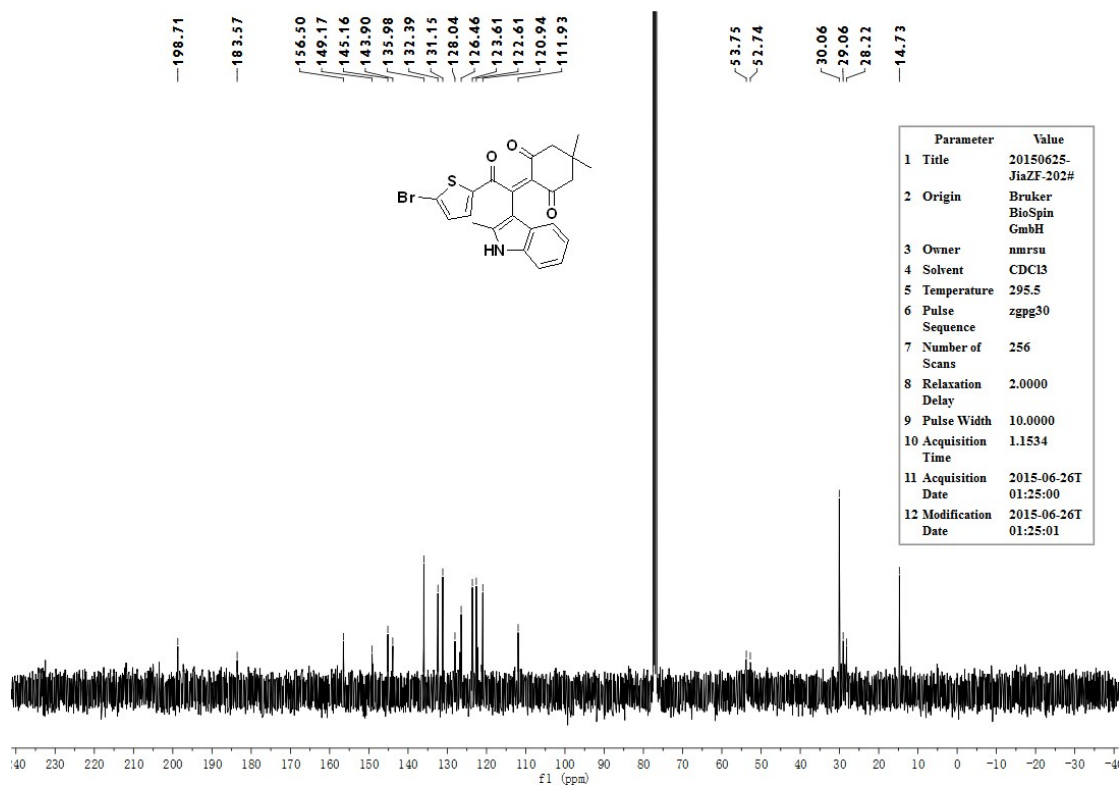

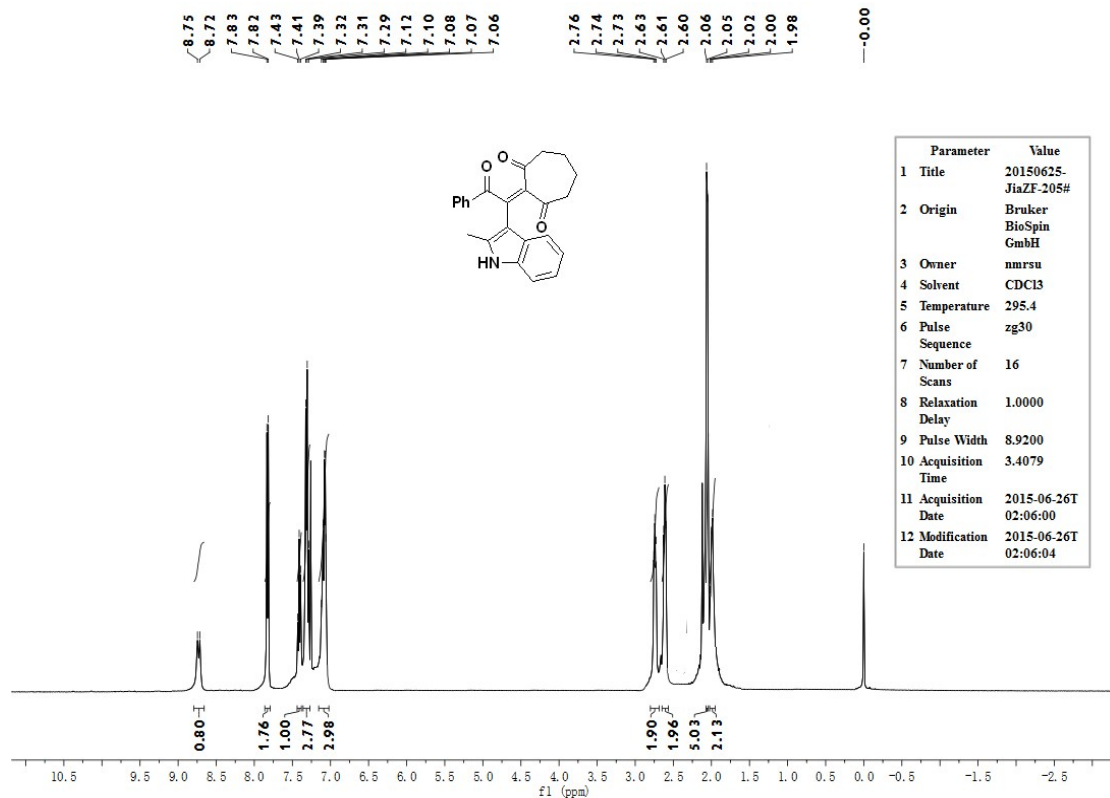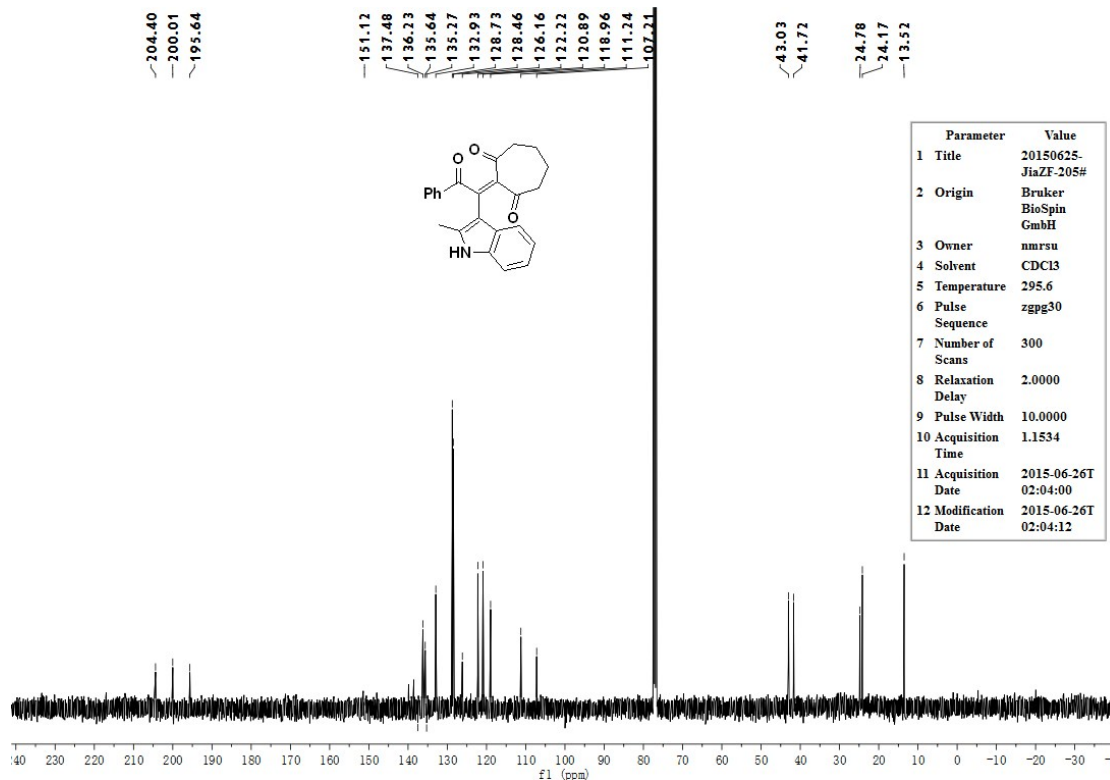

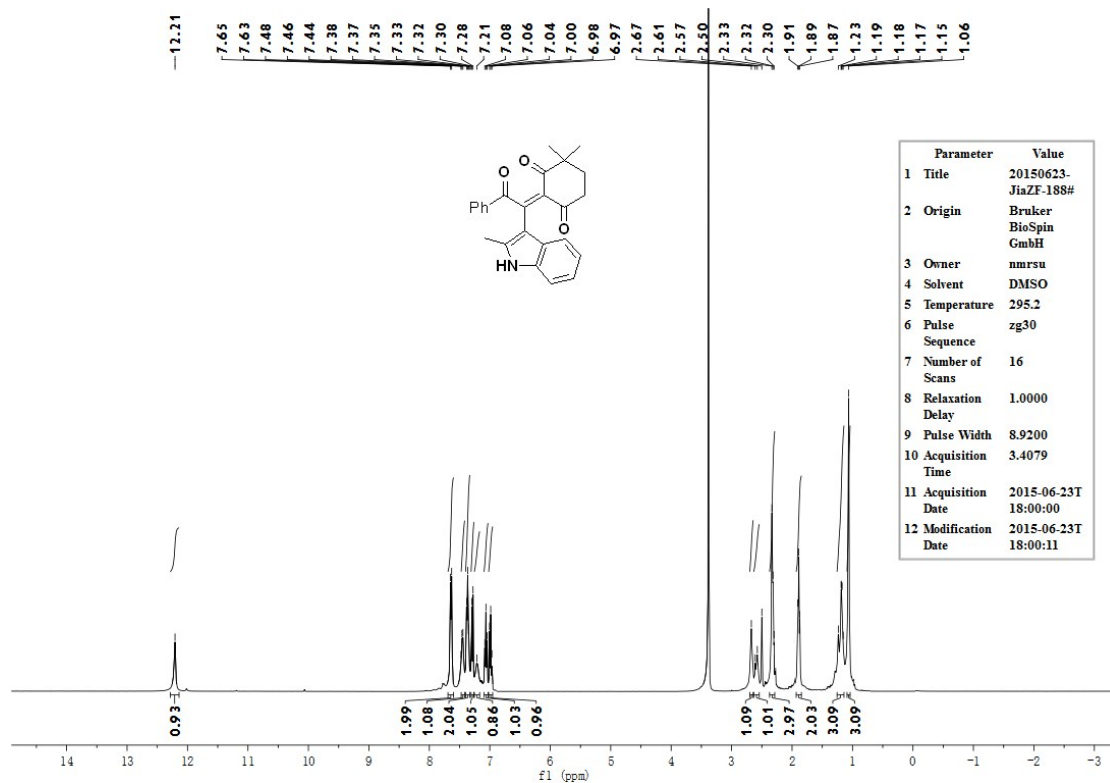

| Parameter            | Value               |
|----------------------|---------------------|
| 1 Title              | 20150623-JiaZF-188# |
| 2 Origin             | Bruker BioSpin GmbH |
| 3 Owner              | nrrsu               |
| 4 Solvent            | DMSO                |
| 5 Temperature        | 295.2               |
| 6 Pulse Sequence     | zg30                |
| 7 Number of Scans    | 16                  |
| 8 Relaxation Delay   | 1.0000              |
| 9 Pulse Width        | 8.9200              |
| 10 Acquisition Time  | 3.4079              |
| 11 Acquisition Date  | 2015-06-23T18:00:00 |
| 12 Modification Date | 2015-06-23T18:00:11 |

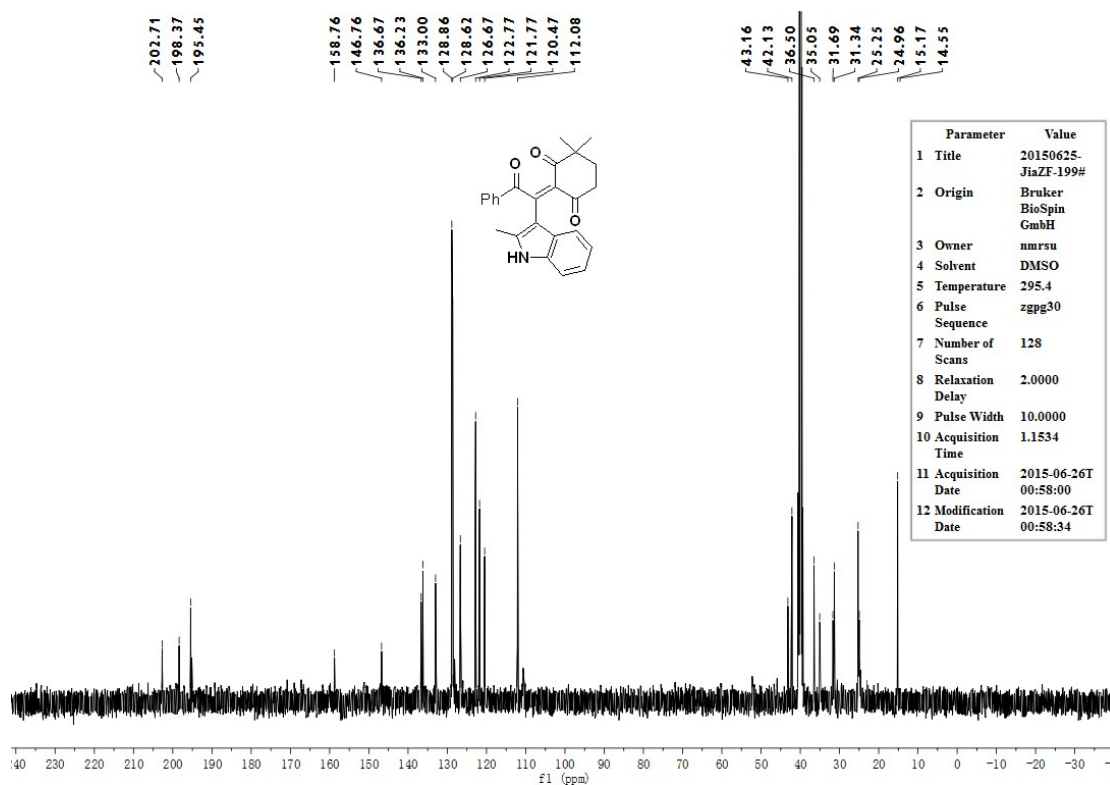

| Parameter            | Value               |
|----------------------|---------------------|
| 1 Title              | 20150625-JiaZF-199# |
| 2 Origin             | Bruker BioSpin GmbH |
| 3 Owner              | nrrsu               |
| 4 Solvent            | DMSO                |
| 5 Temperature        | 295.4               |
| 6 Pulse Sequence     | zgpg30              |
| 7 Number of Scans    | 128                 |
| 8 Relaxation Delay   | 2.0000              |
| 9 Pulse Width        | 10.0000             |
| 10 Acquisition Time  | 1.1534              |
| 11 Acquisition Date  | 2015-06-26T00:58:00 |
| 12 Modification Date | 2015-06-26T00:58:34 |

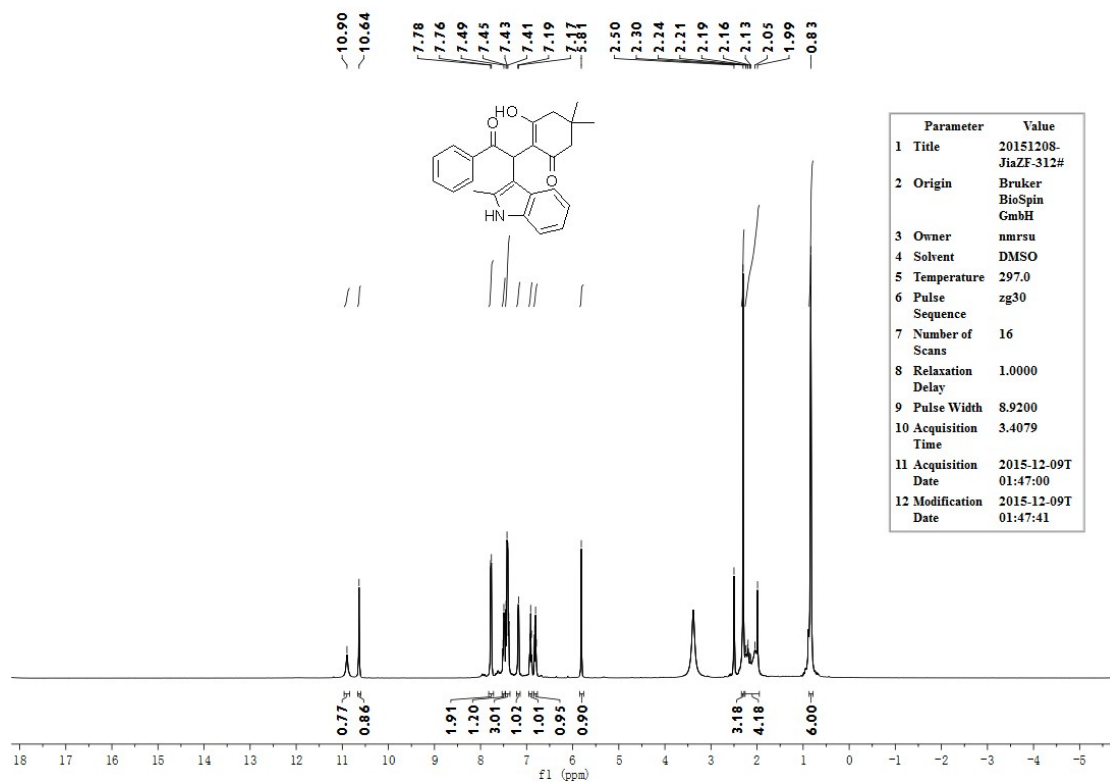

| Parameter            | Value                |
|----------------------|----------------------|
| 1 Title              | 20151208-JiaZF-312#  |
| 2 Origin             | Bruker BioSpin GmbH  |
| 3 Owner              | nmrsu                |
| 4 Solvent            | DMSO                 |
| 5 Temperature        | 297.0                |
| 6 Pulse Sequence     | zg30                 |
| 7 Number of Scans    | 16                   |
| 8 Relaxation Delay   | 1.0000               |
| 9 Pulse Width        | 8.9200               |
| 10 Acquisition Time  | 3.4079               |
| 11 Acquisition Date  | 2015-12-09T 01:47:00 |
| 12 Modification Date | 2015-12-09T 01:47:41 |

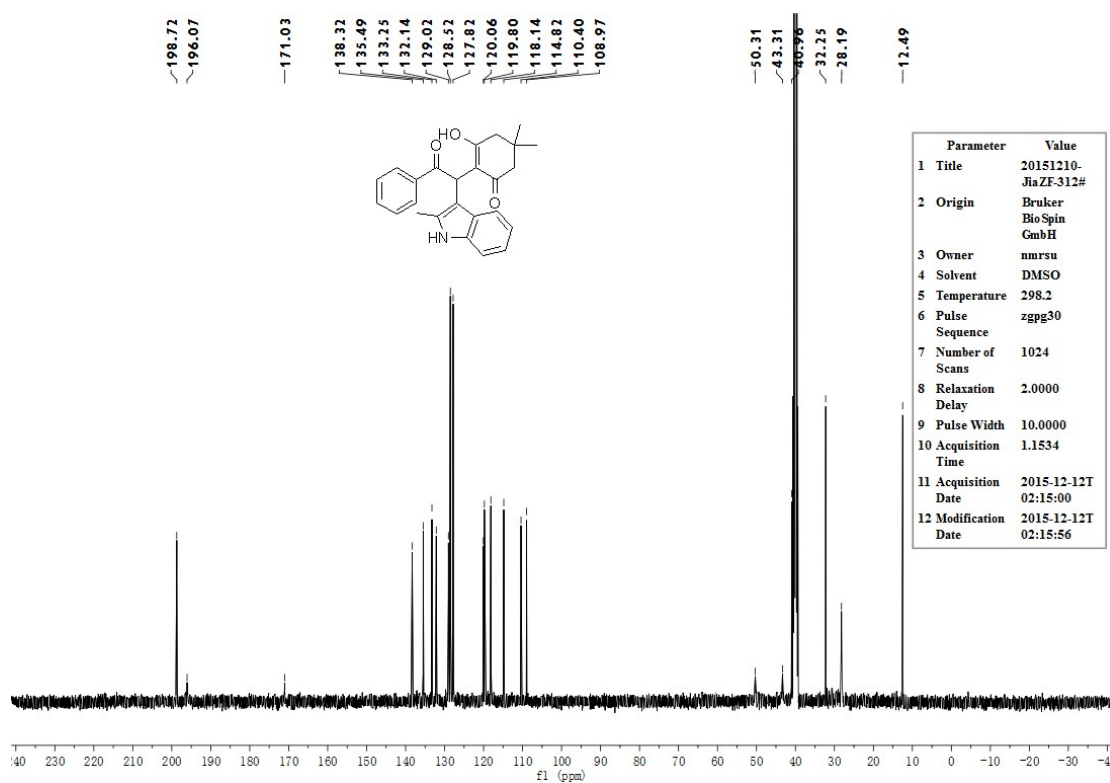

| Parameter            | Value                |
|----------------------|----------------------|
| 1 Title              | 20151210-JiaZF-312#  |
| 2 Origin             | Bruker BioSpin GmbH  |
| 3 Owner              | nmrsu                |
| 4 Solvent            | DMSO                 |
| 5 Temperature        | 298.2                |
| 6 Pulse Sequence     | zggg30               |
| 7 Number of Scans    | 1024                 |
| 8 Relaxation Delay   | 2.0000               |
| 9 Pulse Width        | 10.0000              |
| 10 Acquisition Time  | 1.1534               |
| 11 Acquisition Date  | 2015-12-12T 02:15:00 |
| 12 Modification Date | 2015-12-12T 02:15:56 |



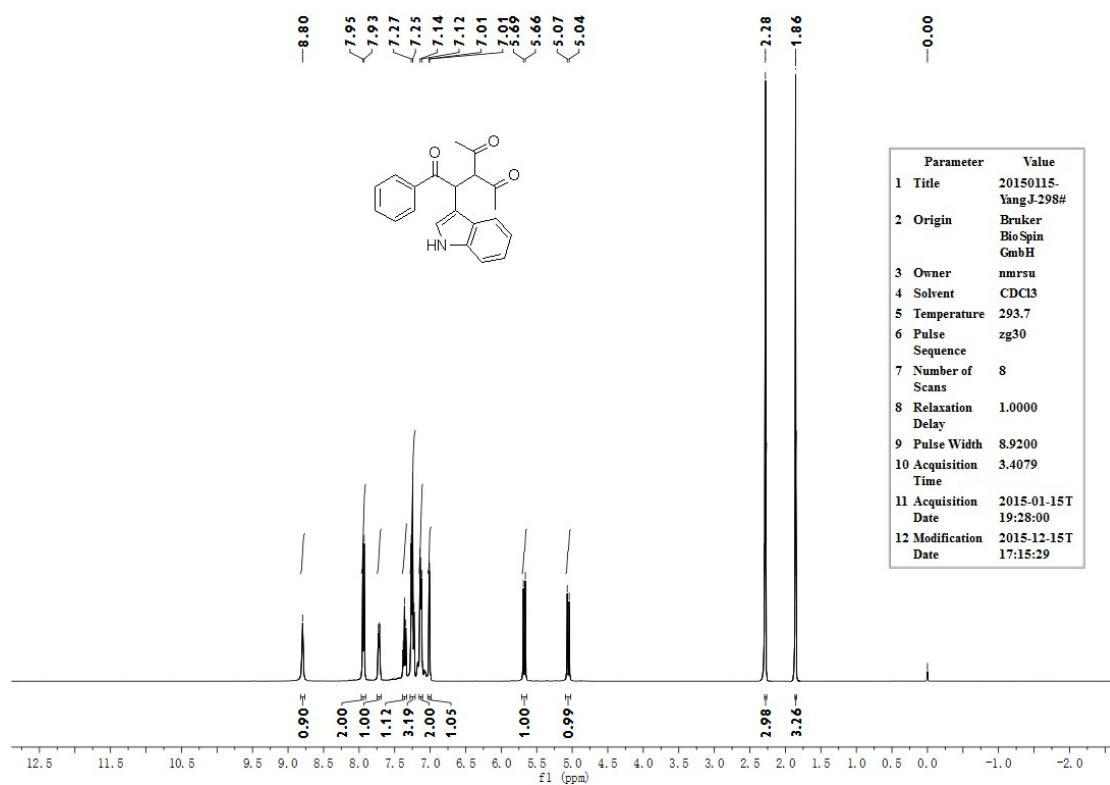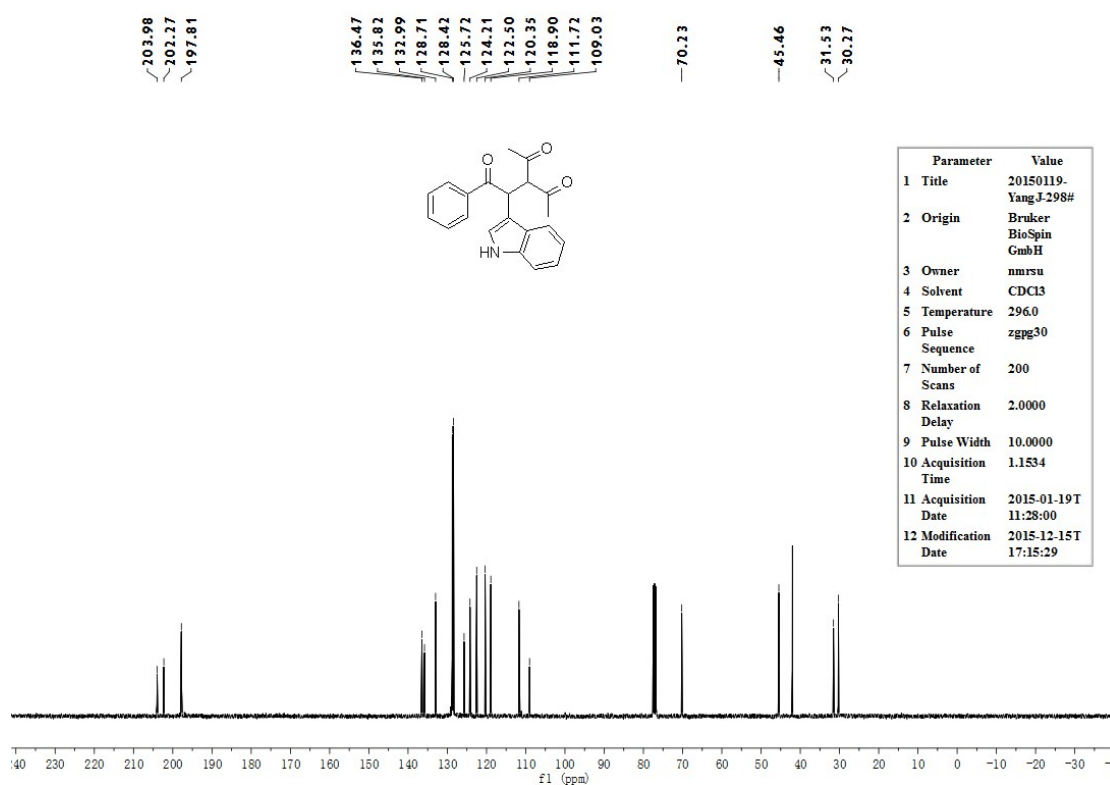

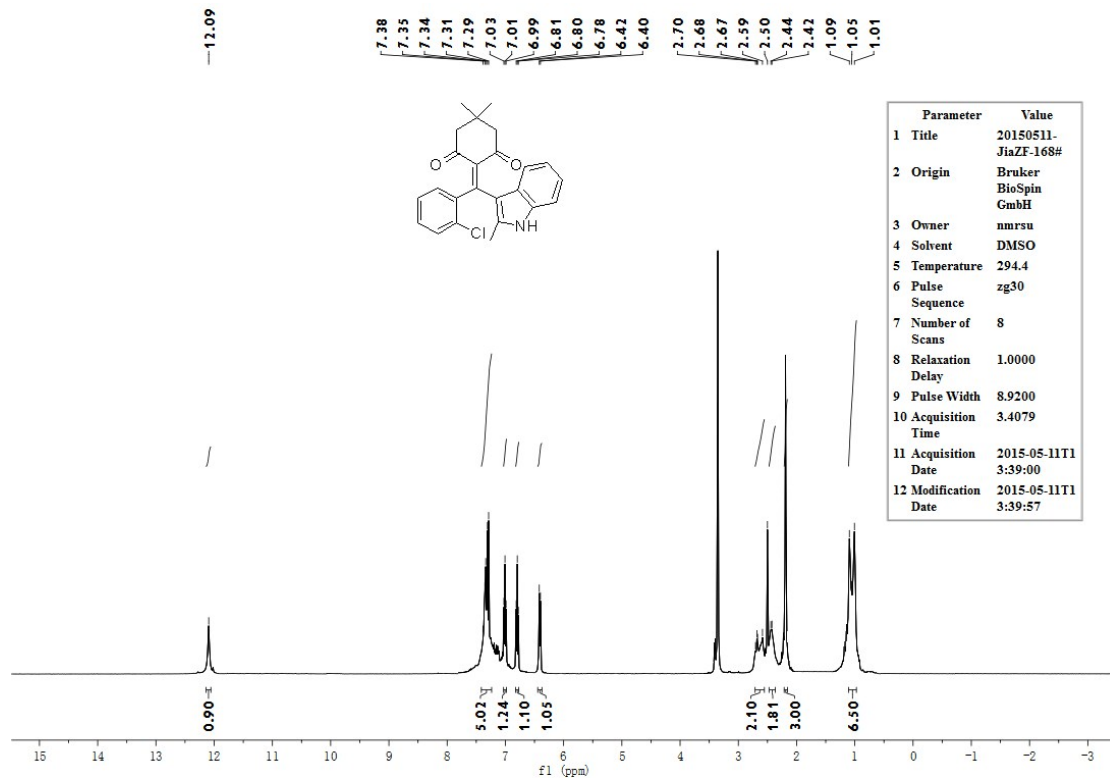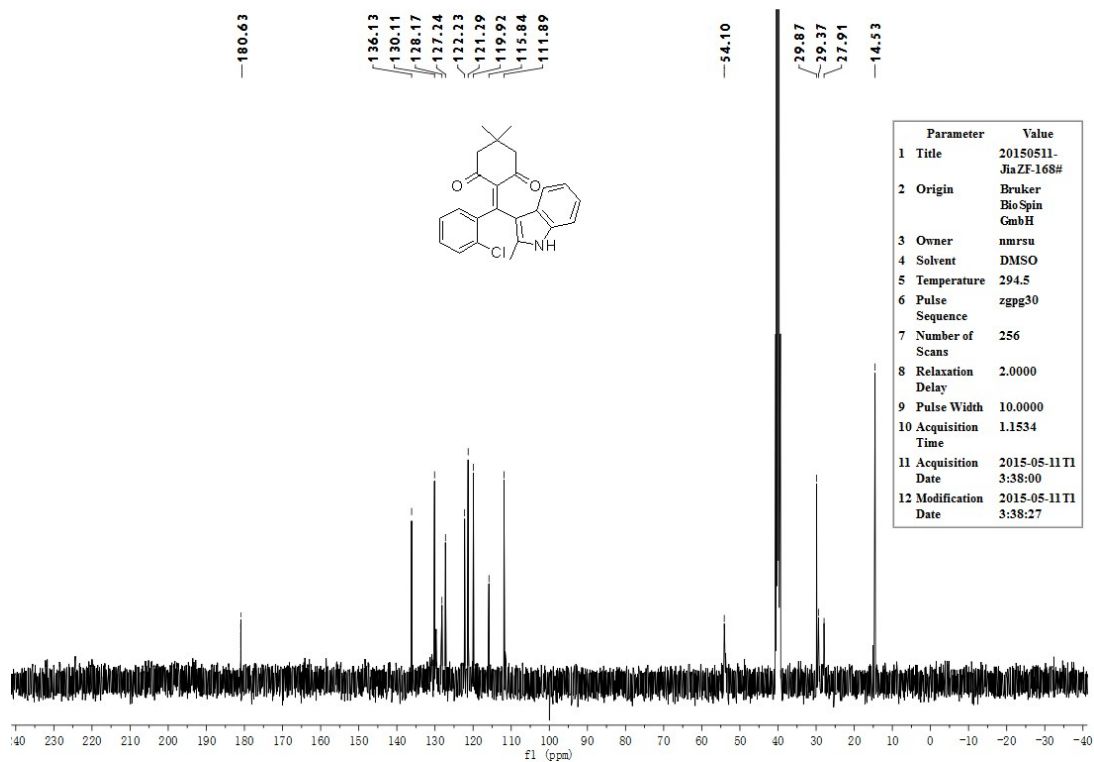

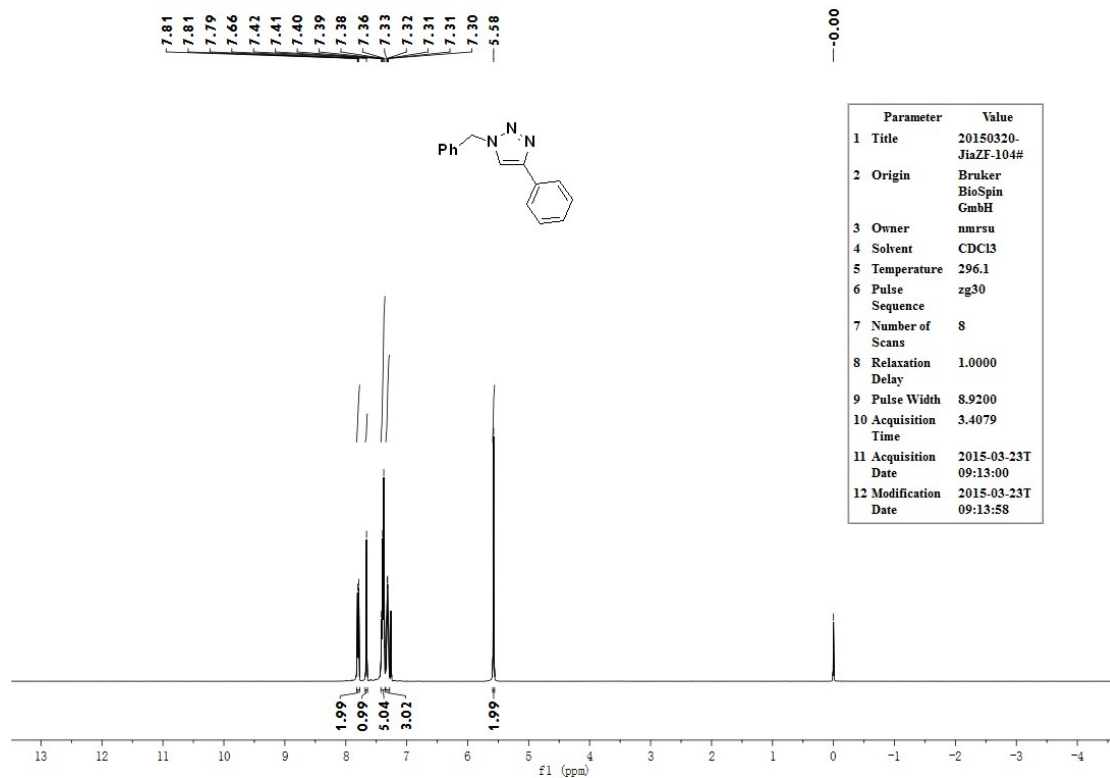

| Parameter            | Value                     |
|----------------------|---------------------------|
| 1 Title              | 20150320-<br>JiaZF-104#   |
| 2 Origin             | Bruker<br>BioSpin<br>GmbH |
| 3 Owner              | nmrsl                     |
| 4 Solvent            | CDCl3                     |
| 5 Temperature        | 296.1                     |
| 6 Pulse Sequence     | zg30                      |
| 7 Number of Scans    | 8                         |
| 8 Relaxation Delay   | 1.0000                    |
| 9 Pulse Width        | 8.9200                    |
| 10 Acquisition Time  | 3.4079                    |
| 11 Acquisition Date  | 2015-03-23T<br>09:13:00   |
| 12 Modification Date | 2015-03-23T<br>09:13:58   |

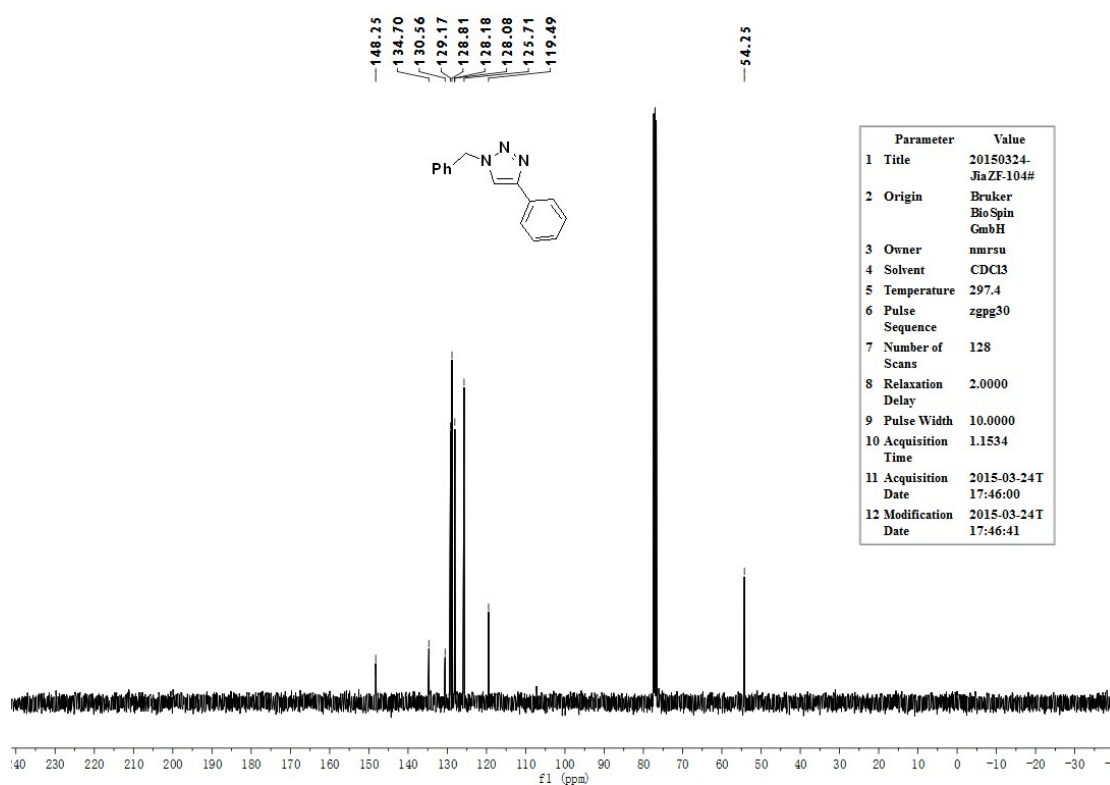

| Parameter            | Value                     |
|----------------------|---------------------------|
| 1 Title              | 20150324-<br>JiaZF-104#   |
| 2 Origin             | Bruker<br>BioSpin<br>GmbH |
| 3 Owner              | nmrsl                     |
| 4 Solvent            | CDCl3                     |
| 5 Temperature        | 297.4                     |
| 6 Pulse Sequence     | zgpg30                    |
| 7 Number of Scans    | 128                       |
| 8 Relaxation Delay   | 2.0000                    |
| 9 Pulse Width        | 10.0000                   |
| 10 Acquisition Time  | 1.1534                    |
| 11 Acquisition Date  | 2015-03-24T<br>17:46:00   |
| 12 Modification Date | 2015-03-24T<br>17:46:41   |

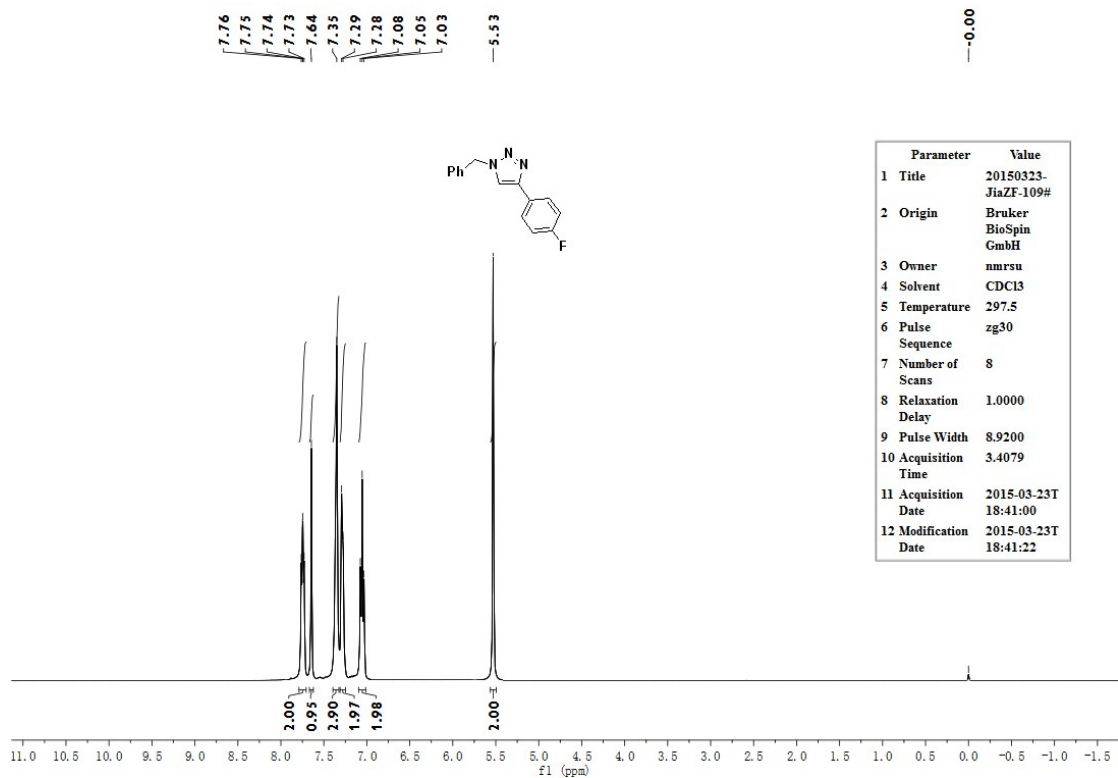

| Parameter            | Value                |
|----------------------|----------------------|
| 1 Title              | 20150323-JiaZF-109#  |
| 2 Origin             | Bruker BioSpin GmbH  |
| 3 Owner              | nmrsu                |
| 4 Solvent            | CDCl3                |
| 5 Temperature        | 297.5                |
| 6 Pulse Sequence     | zg30                 |
| 7 Number of Scans    | 8                    |
| 8 Relaxation Delay   | 1.0000               |
| 9 Pulse Width        | 8.9200               |
| 10 Acquisition Time  | 3.4079               |
| 11 Acquisition Date  | 2015-03-23T 18:41:00 |
| 12 Modification Date | 2015-03-23T 18:41:22 |

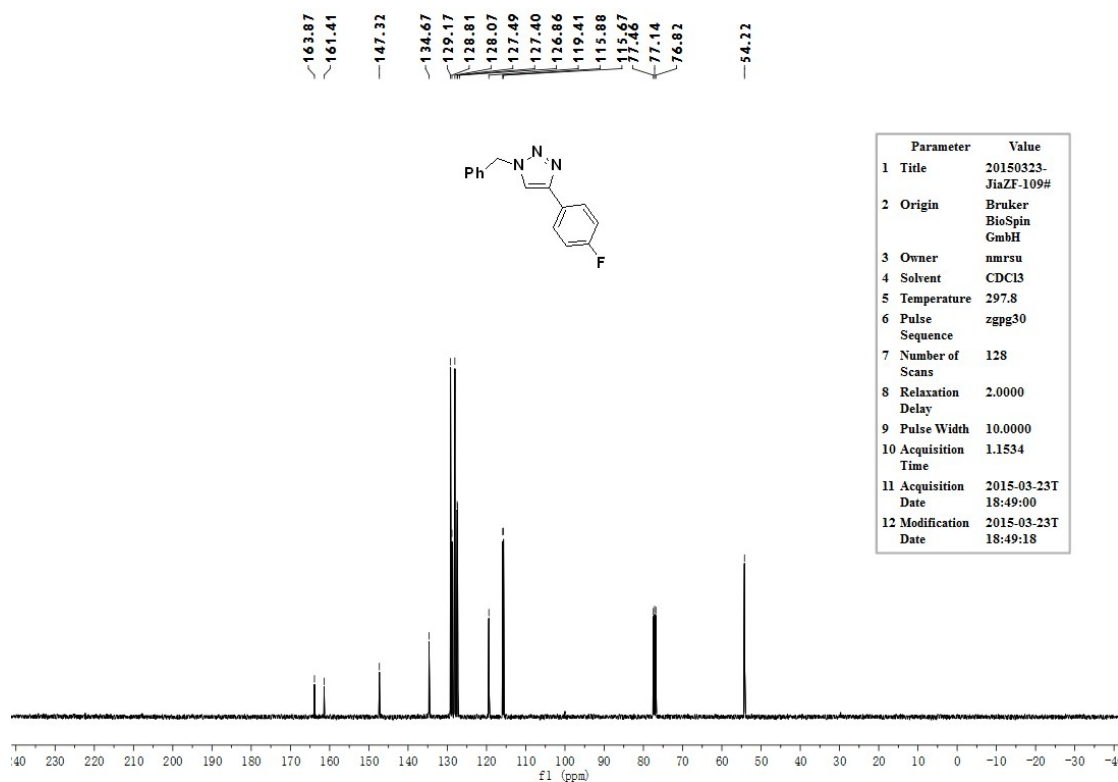

| Parameter            | Value                |
|----------------------|----------------------|
| 1 Title              | 20150323-JiaZF-109#  |
| 2 Origin             | Bruker BioSpin GmbH  |
| 3 Owner              | nmrsu                |
| 4 Solvent            | CDCl3                |
| 5 Temperature        | 297.8                |
| 6 Pulse Sequence     | zgpg30               |
| 7 Number of Scans    | 128                  |
| 8 Relaxation Delay   | 2.0000               |
| 9 Pulse Width        | 10.0000              |
| 10 Acquisition Time  | 1.1534               |
| 11 Acquisition Date  | 2015-03-23T 18:49:00 |
| 12 Modification Date | 2015-03-23T 18:49:18 |

-113.47  
-113.49  
-113.50  
-113.51  
-113.52  
-113.53  
-113.55

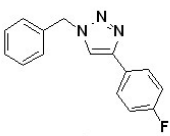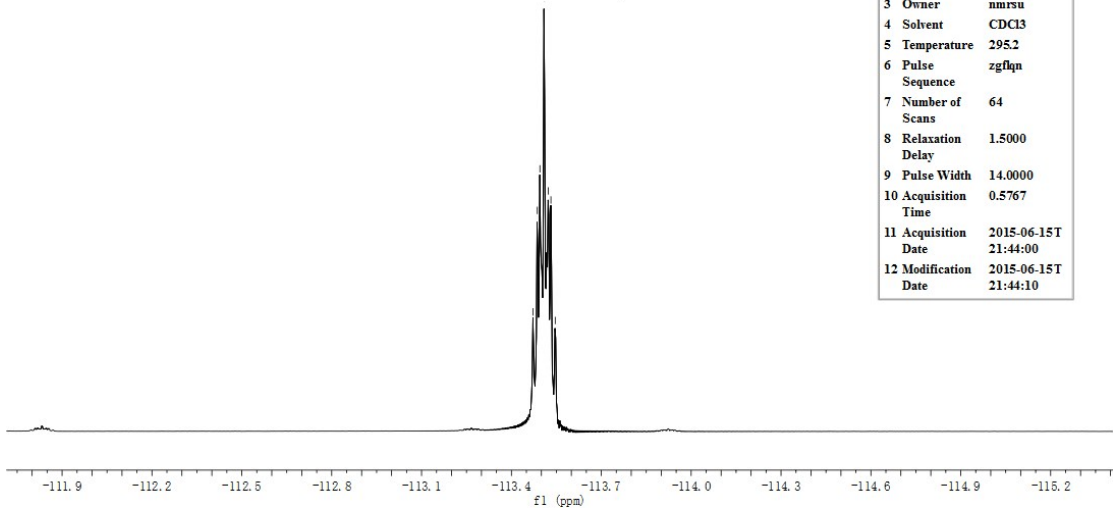

| Parameter            | Value                |
|----------------------|----------------------|
| 1 Title              | 20150615-JiaZE-109#  |
| 2 Origin             | Bruker BioSpin GmbH  |
| 3 Owner              | nmsu                 |
| 4 Solvent            | CDCl3                |
| 5 Temperature        | 295.2                |
| 6 Pulse Sequence     | zgpgq                |
| 7 Number of Scans    | 64                   |
| 8 Relaxation Delay   | 1.5000               |
| 9 Pulse Width        | 14.0000              |
| 10 Acquisition Time  | 0.5767               |
| 11 Acquisition Date  | 2015-06-15T 21:44:00 |
| 12 Modification Date | 2015-06-15T 21:44:10 |

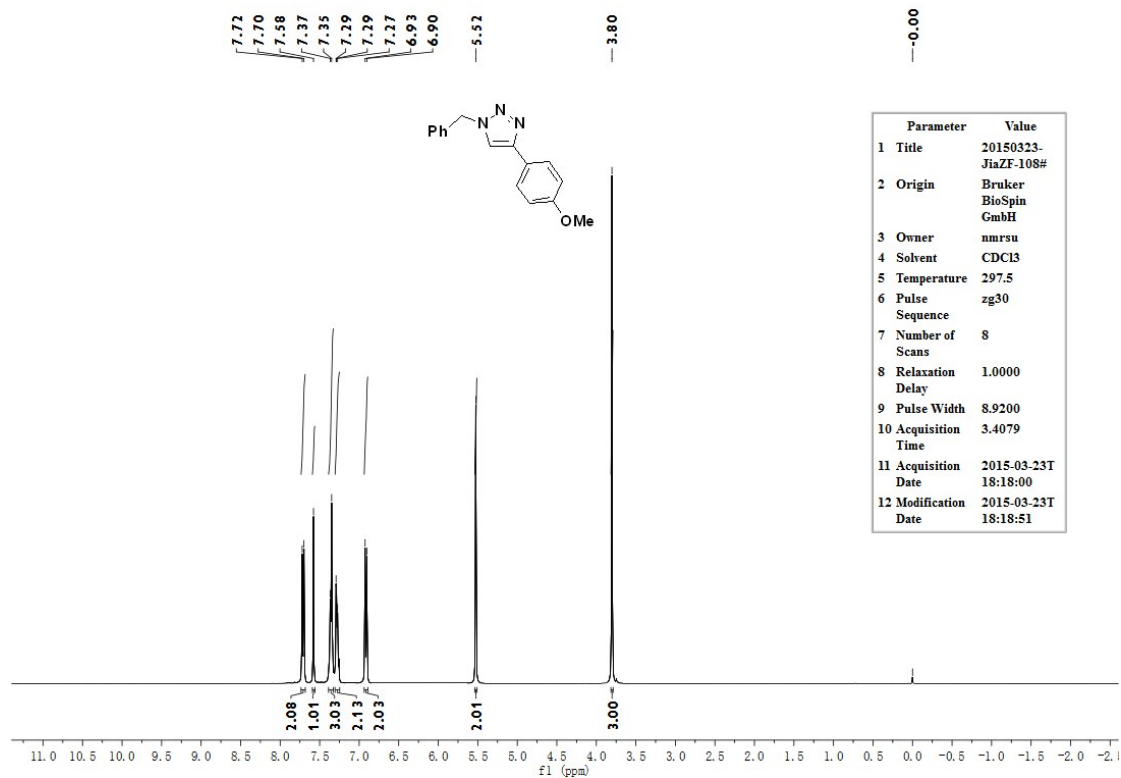

| Parameter            | Value                |
|----------------------|----------------------|
| 1 Title              | 20150323-JiaZF-108#  |
| 2 Origin             | Bruker BioSpin GmbH  |
| 3 Owner              | nmrsu                |
| 4 Solvent            | CDCl3                |
| 5 Temperature        | 297.5                |
| 6 Pulse              | zg30                 |
| 7 Number of Scans    | 8                    |
| 8 Relaxation Delay   | 1.0000               |
| 9 Pulse Width        | 8.9200               |
| 10 Acquisition Time  | 3.4079               |
| 11 Acquisition Date  | 2015-03-23T 18:18:00 |
| 12 Modification Date | 2015-03-23T 18:18:51 |

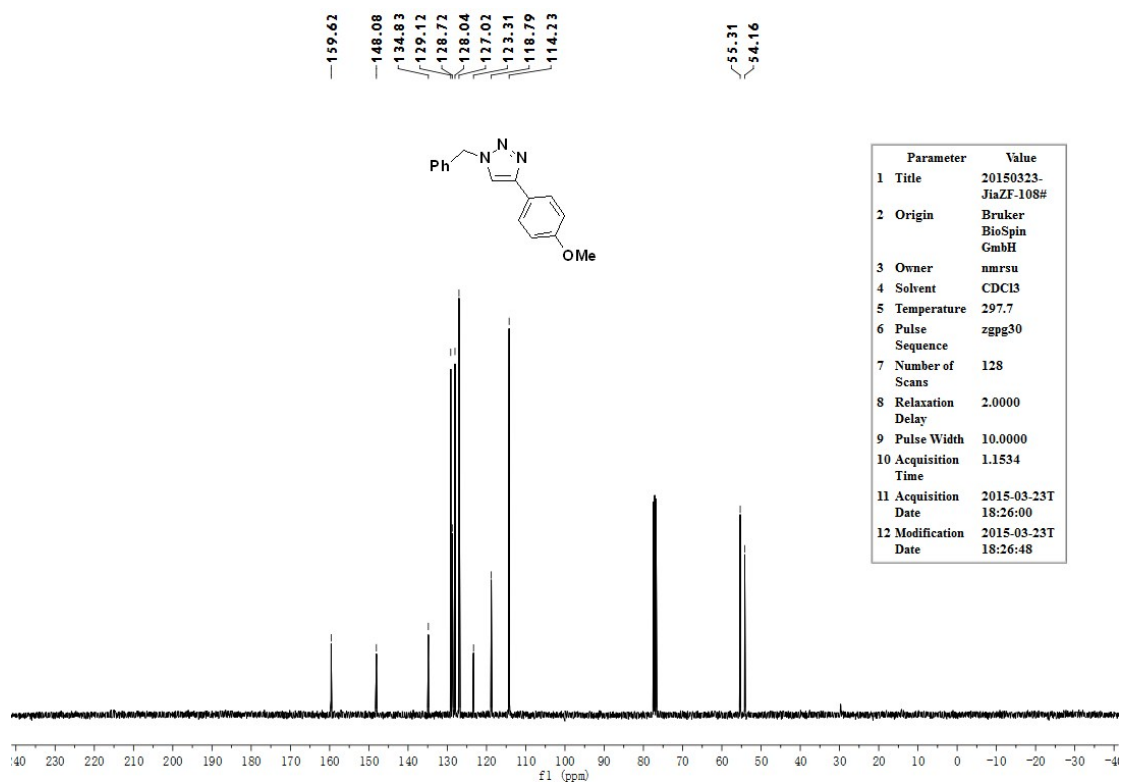

| Parameter            | Value                |
|----------------------|----------------------|
| 1 Title              | 20150323-JiaZF-108#  |
| 2 Origin             | Bruker BioSpin GmbH  |
| 3 Owner              | nmrsu                |
| 4 Solvent            | CDCl3                |
| 5 Temperature        | 297.7                |
| 6 Pulse              | zpgg30               |
| 7 Number of Scans    | 128                  |
| 8 Relaxation Delay   | 2.0000               |
| 9 Pulse Width        | 10.0000              |
| 10 Acquisition Time  | 1.1534               |
| 11 Acquisition Date  | 2015-03-23T 18:26:00 |
| 12 Modification Date | 2015-03-23T 18:26:48 |

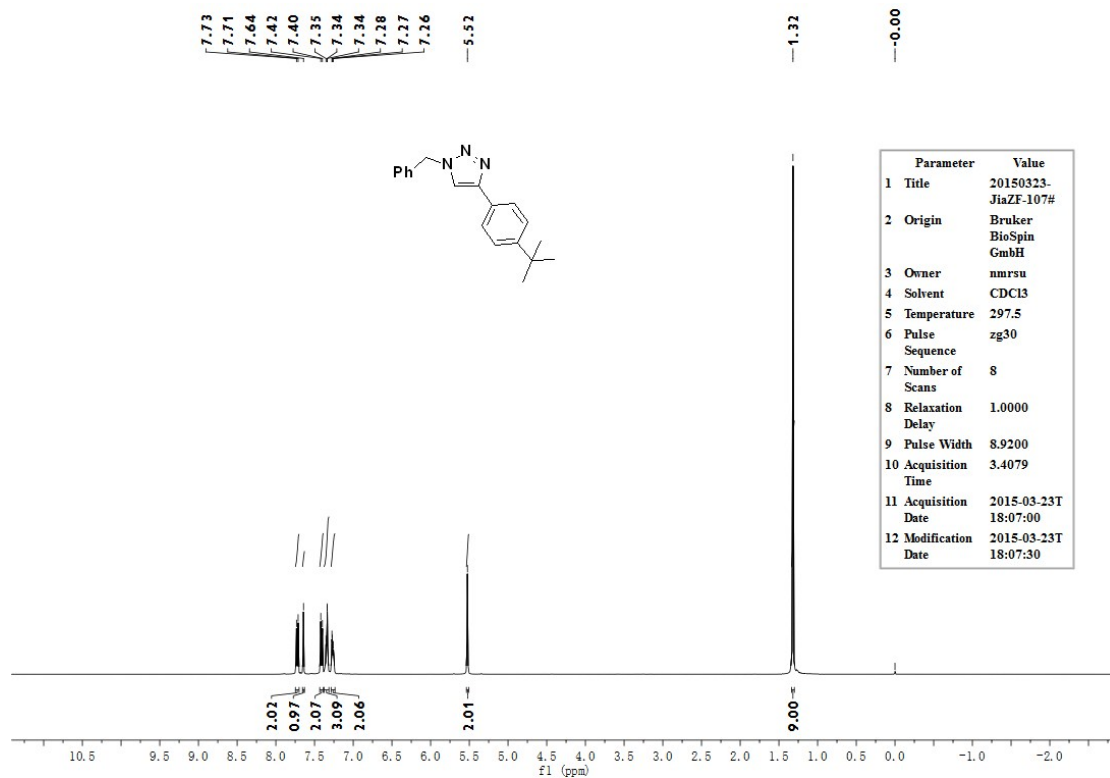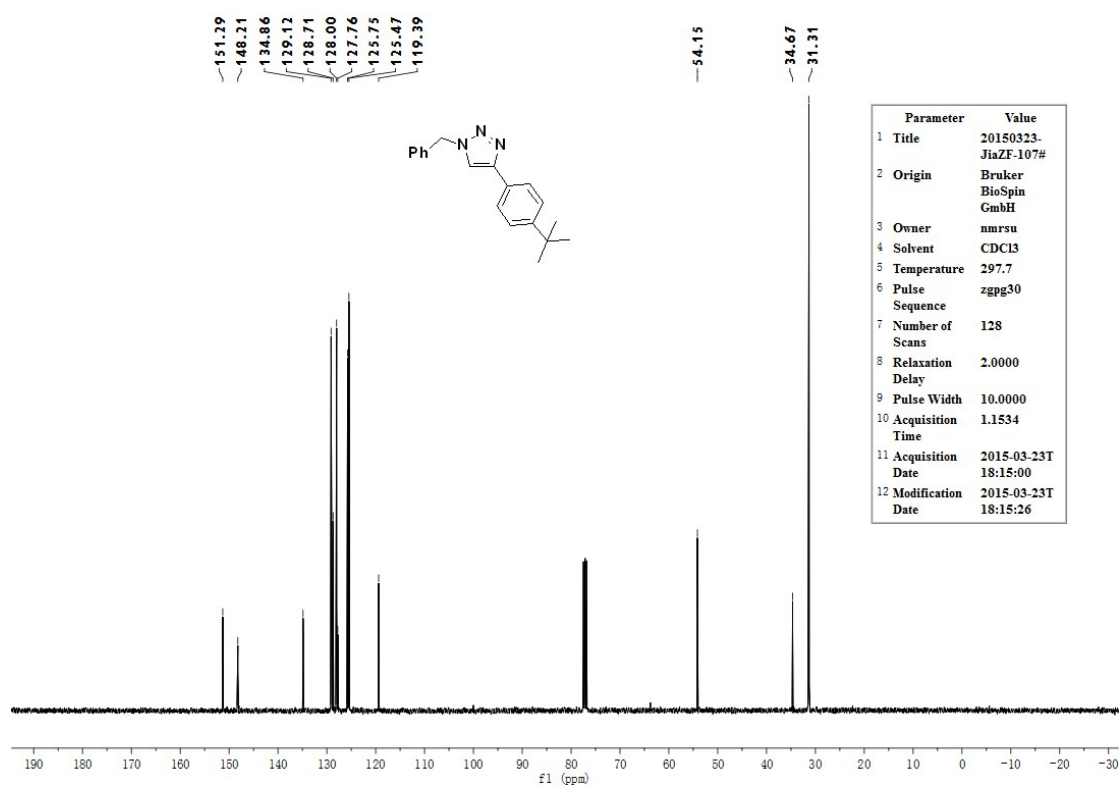

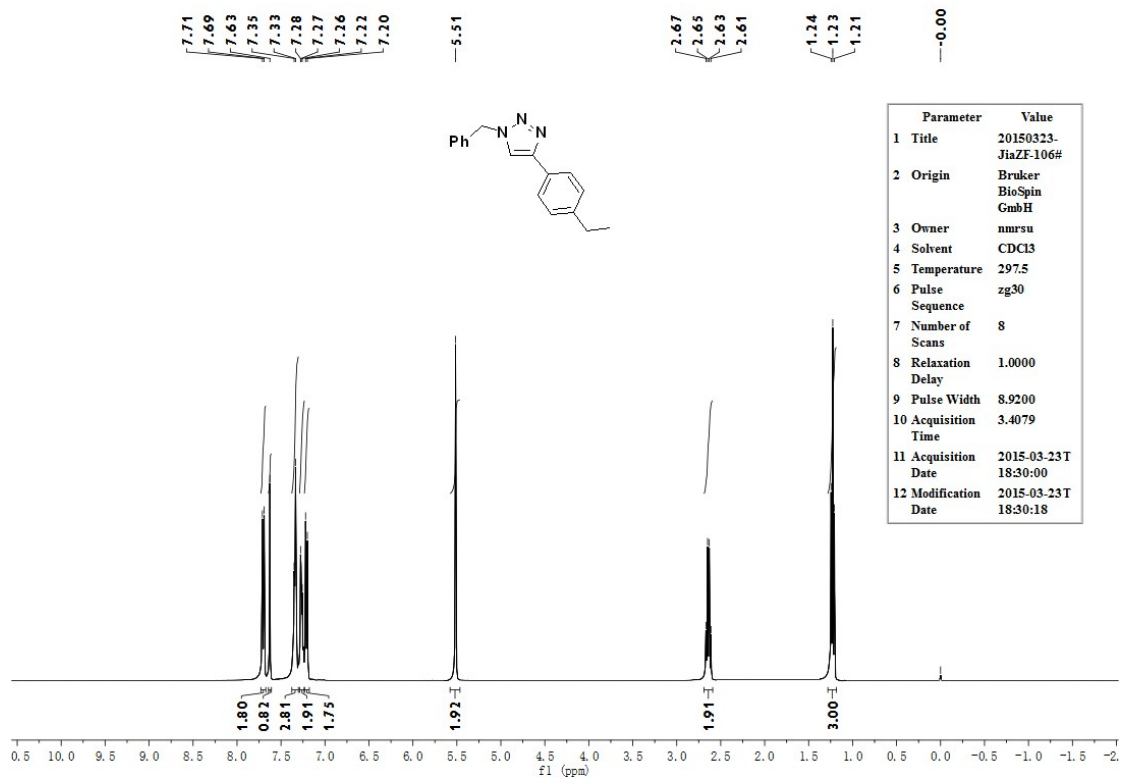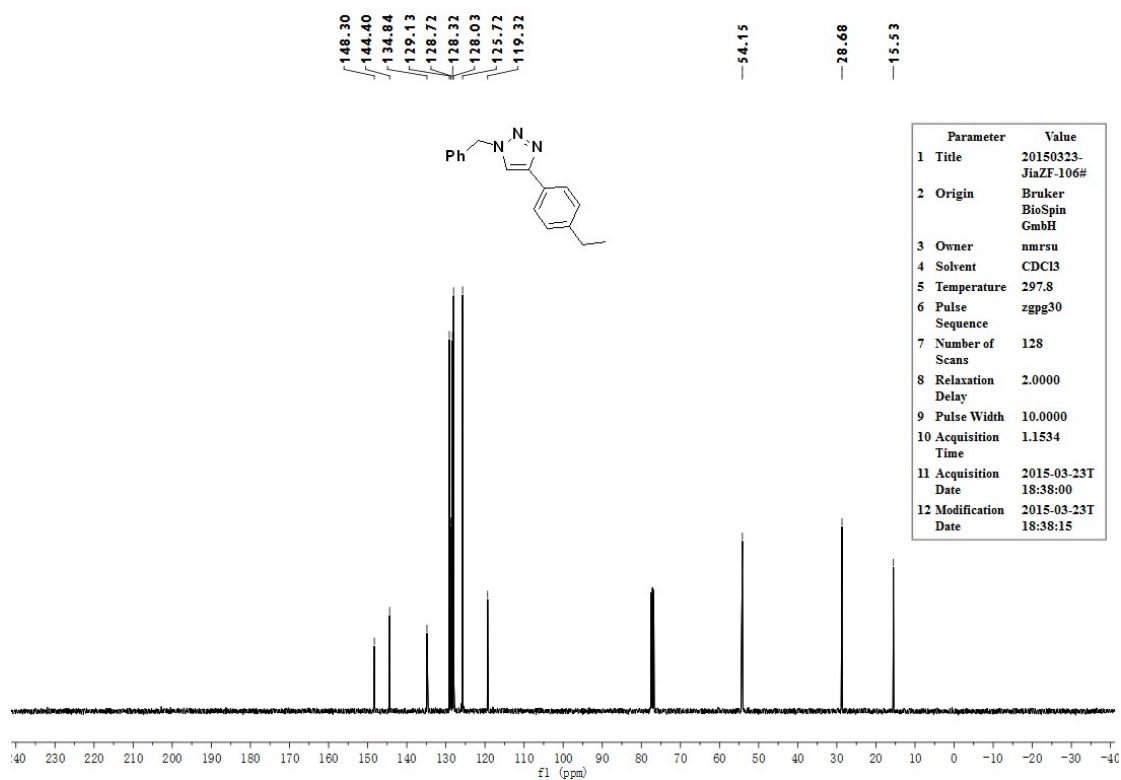



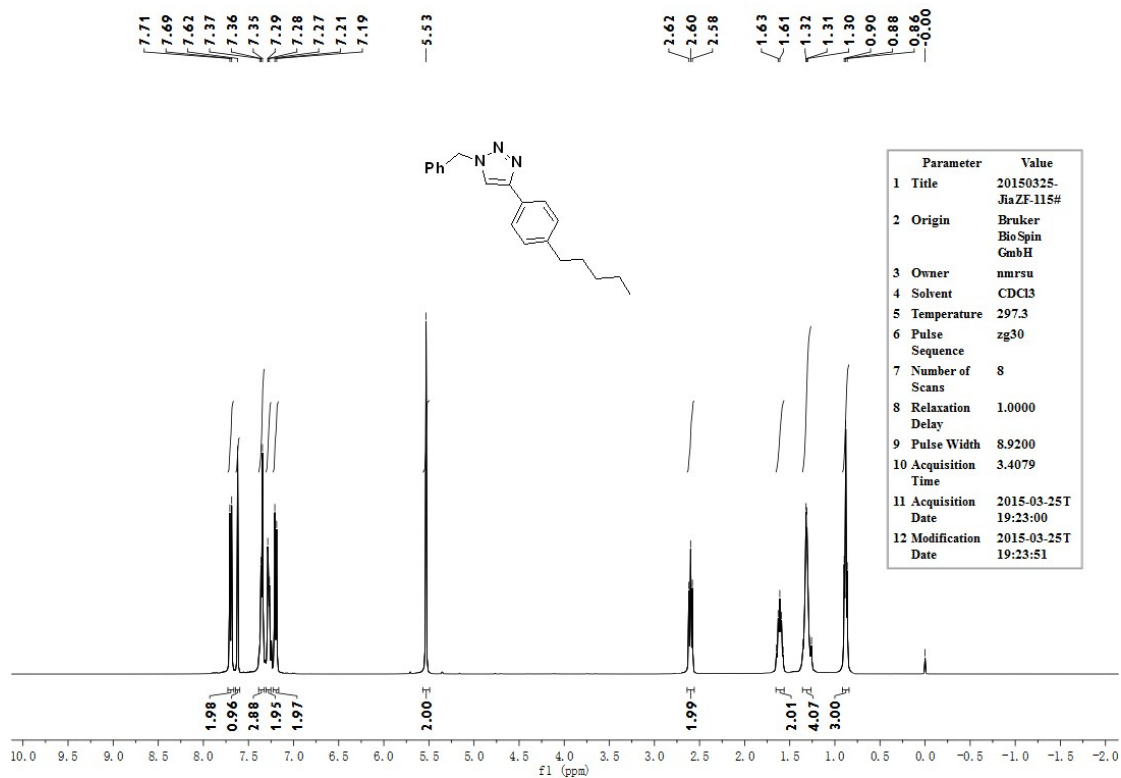

| Parameter            | Value                |
|----------------------|----------------------|
| 1 Title              | 20150325-JiaZF-115#  |
| 2 Origin             | Bruker BioSpin GmbH  |
| 3 Owner              | nmrsu                |
| 4 Solvent            | CDCl3                |
| 5 Temperature        | 297.3                |
| 6 Pulse Sequence     | zg30                 |
| 7 Number of Scans    | 8                    |
| 8 Relaxation Delay   | 1.0000               |
| 9 Pulse Width        | 8.9200               |
| 10 Acquisition Time  | 3.4079               |
| 11 Acquisition Date  | 2015-03-25T 19:23:00 |
| 12 Modification Date | 2015-03-25T 19:23:51 |

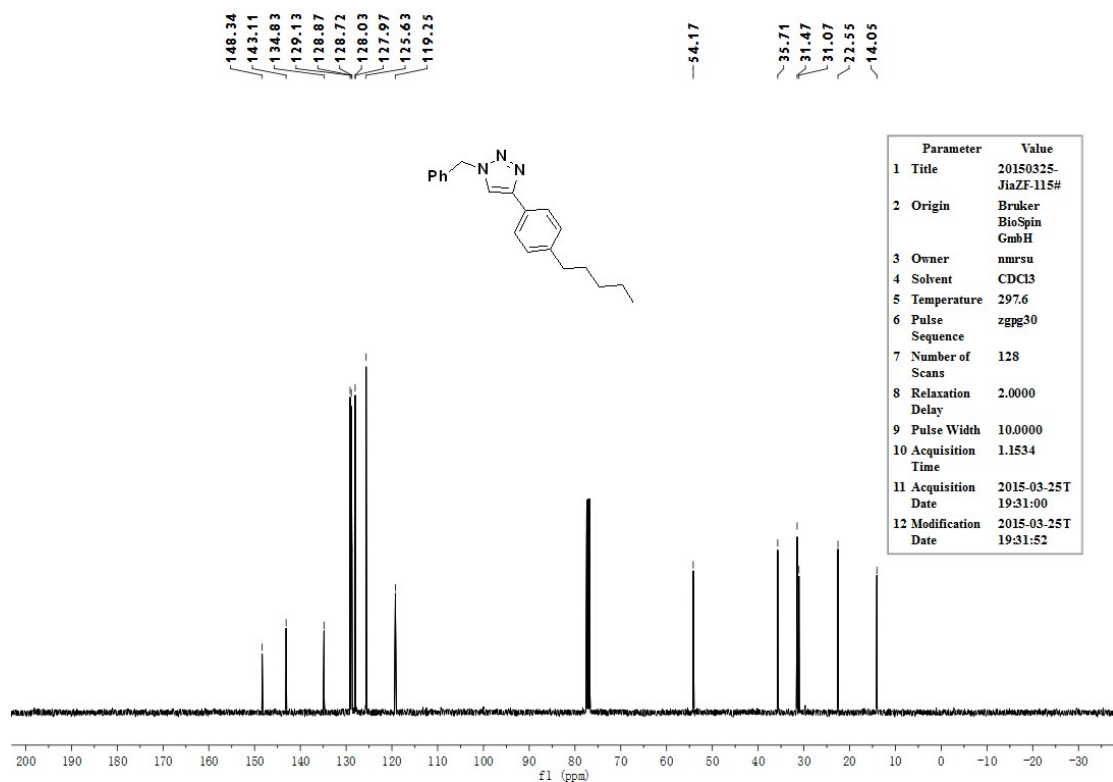

| Parameter            | Value                |
|----------------------|----------------------|
| 1 Title              | 20150325-JiaZF-115#  |
| 2 Origin             | Bruker BioSpin GmbH  |
| 3 Owner              | nmrsu                |
| 4 Solvent            | CDCl3                |
| 5 Temperature        | 297.6                |
| 6 Pulse Sequence     | zgpg30               |
| 7 Number of Scans    | 128                  |
| 8 Relaxation Delay   | 2.0000               |
| 9 Pulse Width        | 10.0000              |
| 10 Acquisition Time  | 1.1534               |
| 11 Acquisition Date  | 2015-03-25T 19:31:00 |
| 12 Modification Date | 2015-03-25T 19:31:52 |

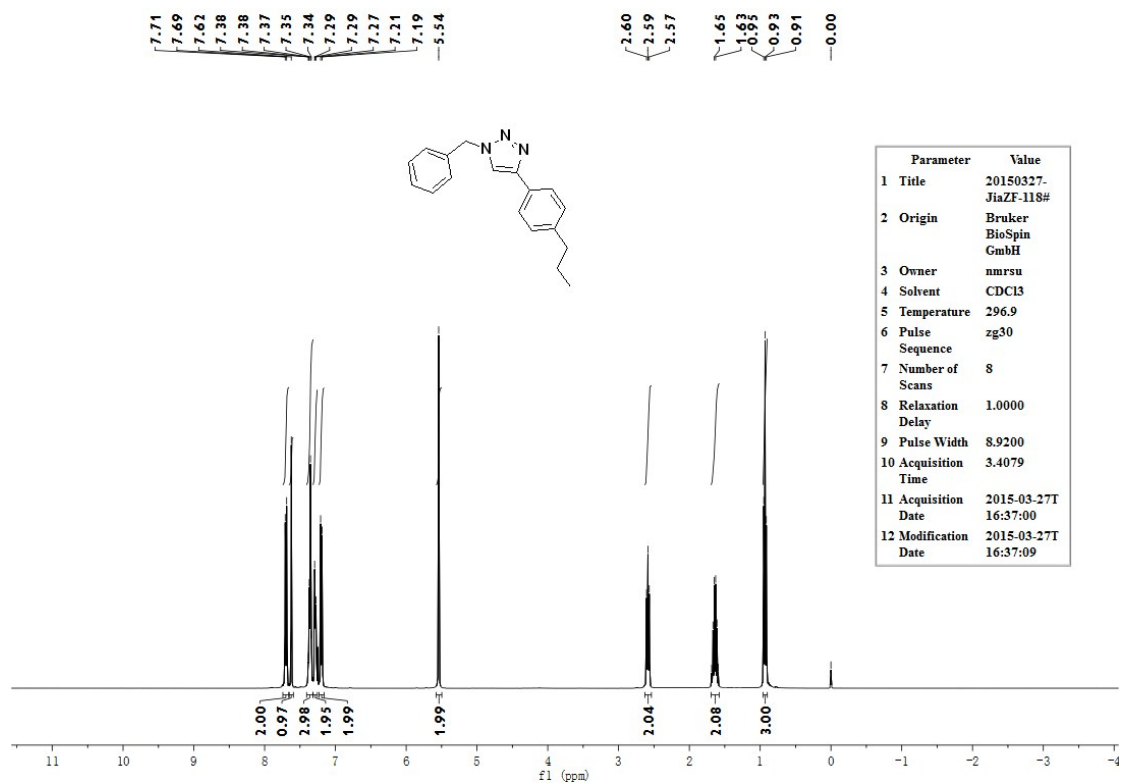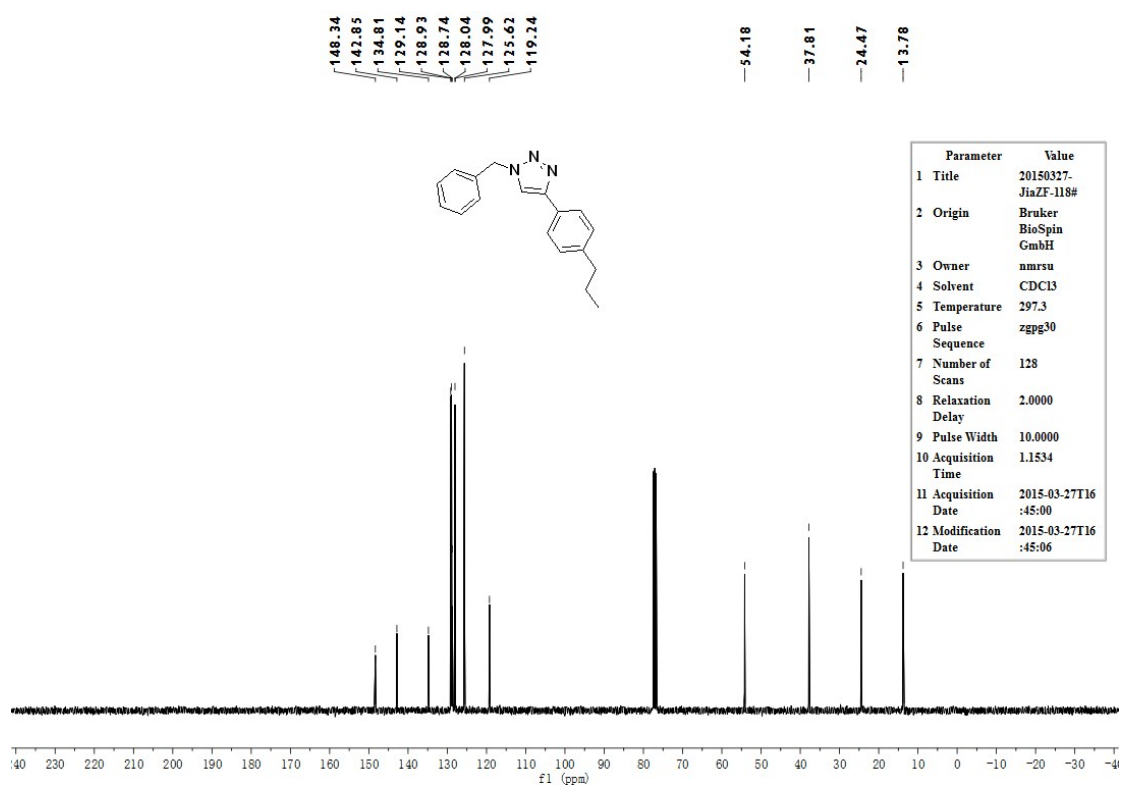

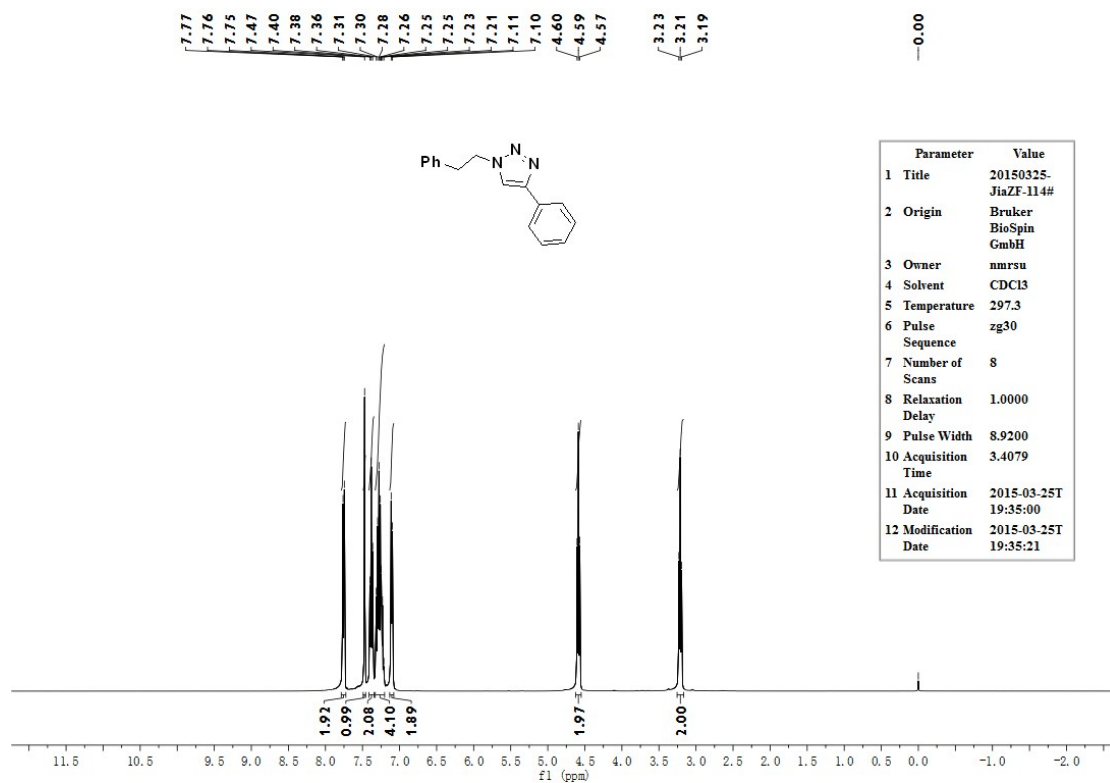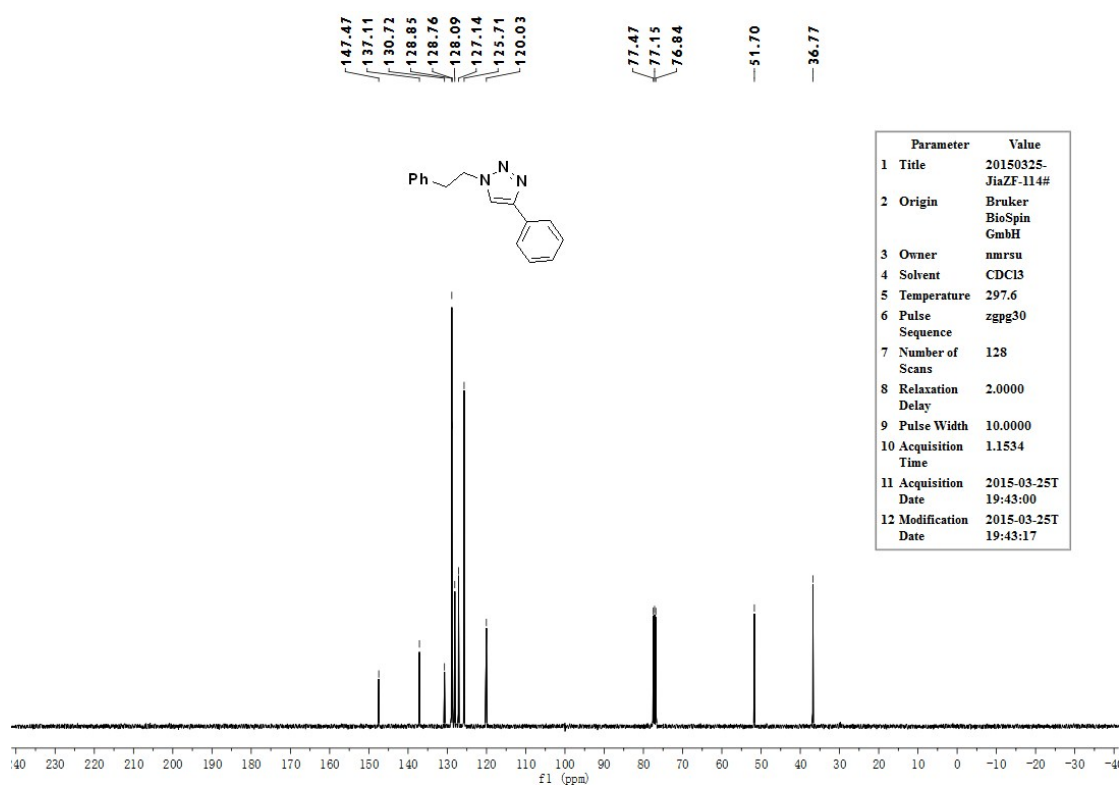

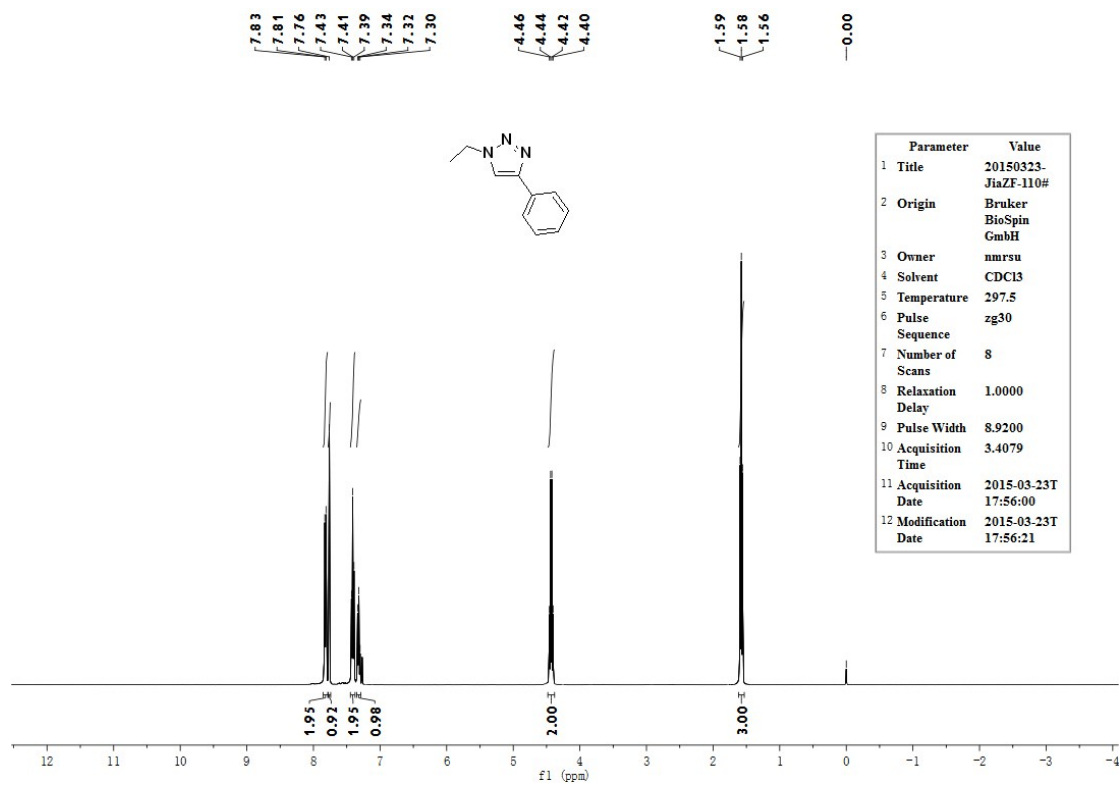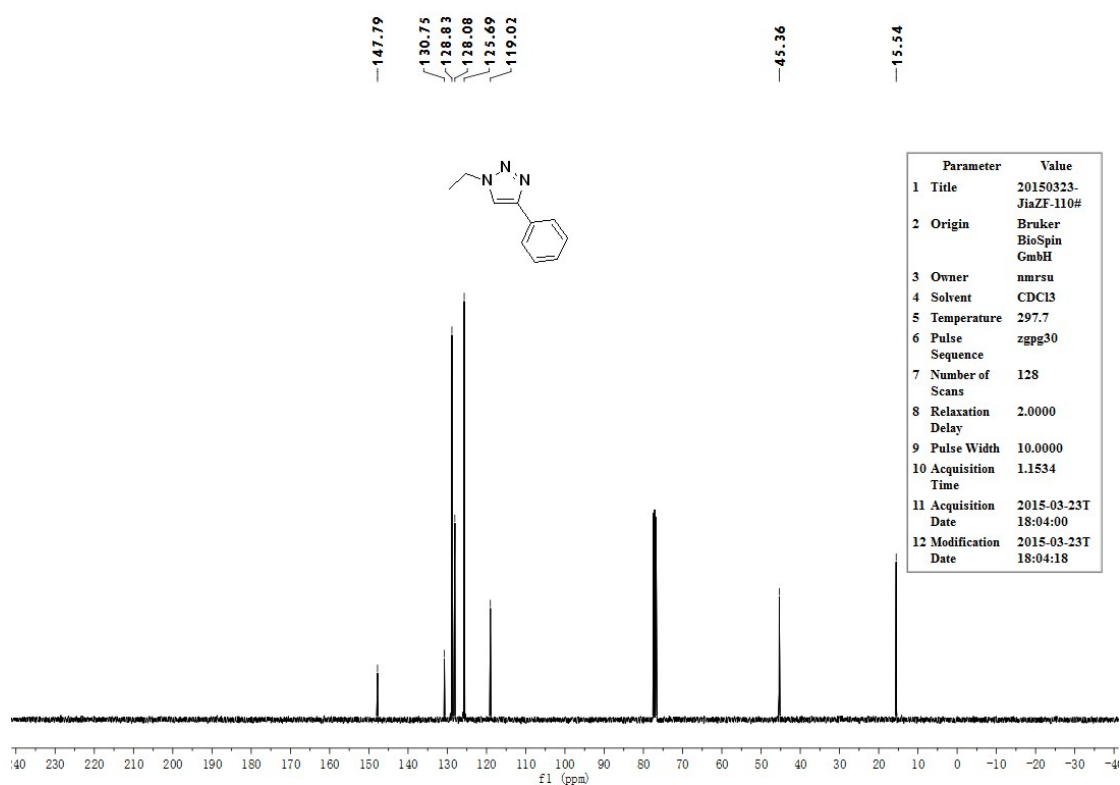

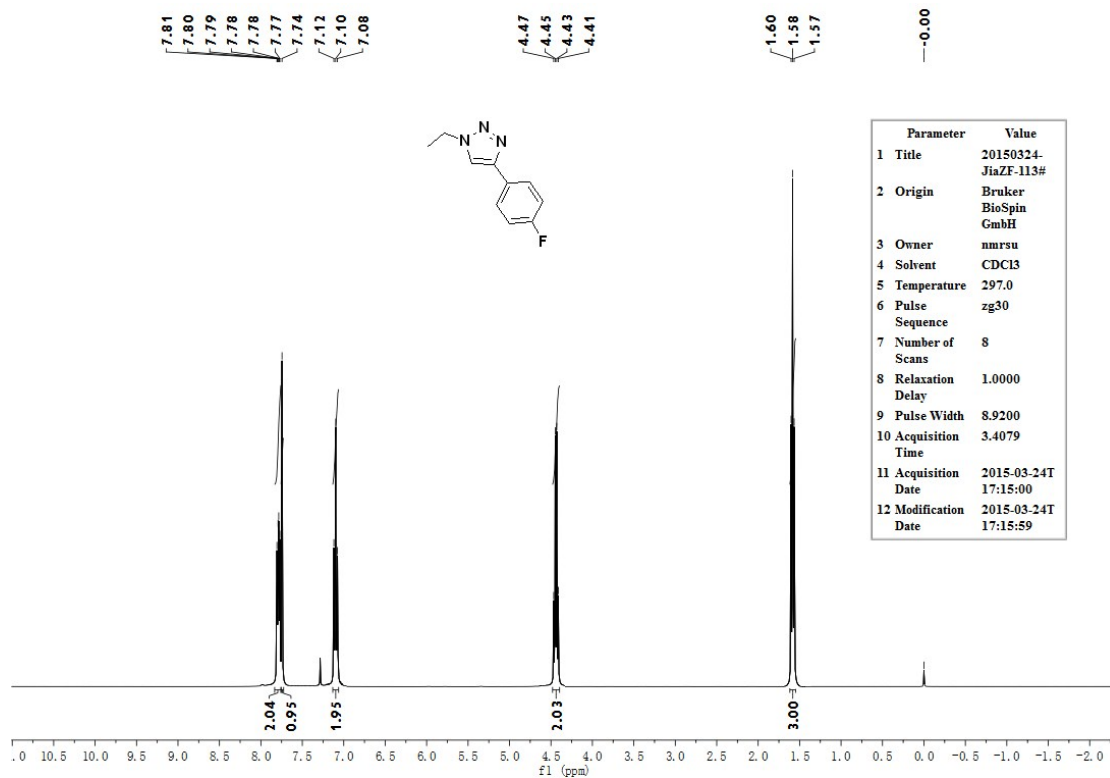

| Parameter            | Value               |
|----------------------|---------------------|
| 1 Title              | 20150324-JiaZF-113# |
| 2 Origin             | Bruker BioSpin GmbH |
| 3 Owner              | nmsru               |
| 4 Solvent            | CDCl3               |
| 5 Temperature        | 297.0               |
| 6 Pulse Sequence     | zg30                |
| 7 Number of Scans    | 8                   |
| 8 Relaxation Delay   | 1.0000              |
| 9 Pulse Width        | 8.9200              |
| 10 Acquisition Time  | 3.4079              |
| 11 Acquisition Date  | 2015-03-24T17:15:00 |
| 12 Modification Date | 2015-03-24T17:15:59 |

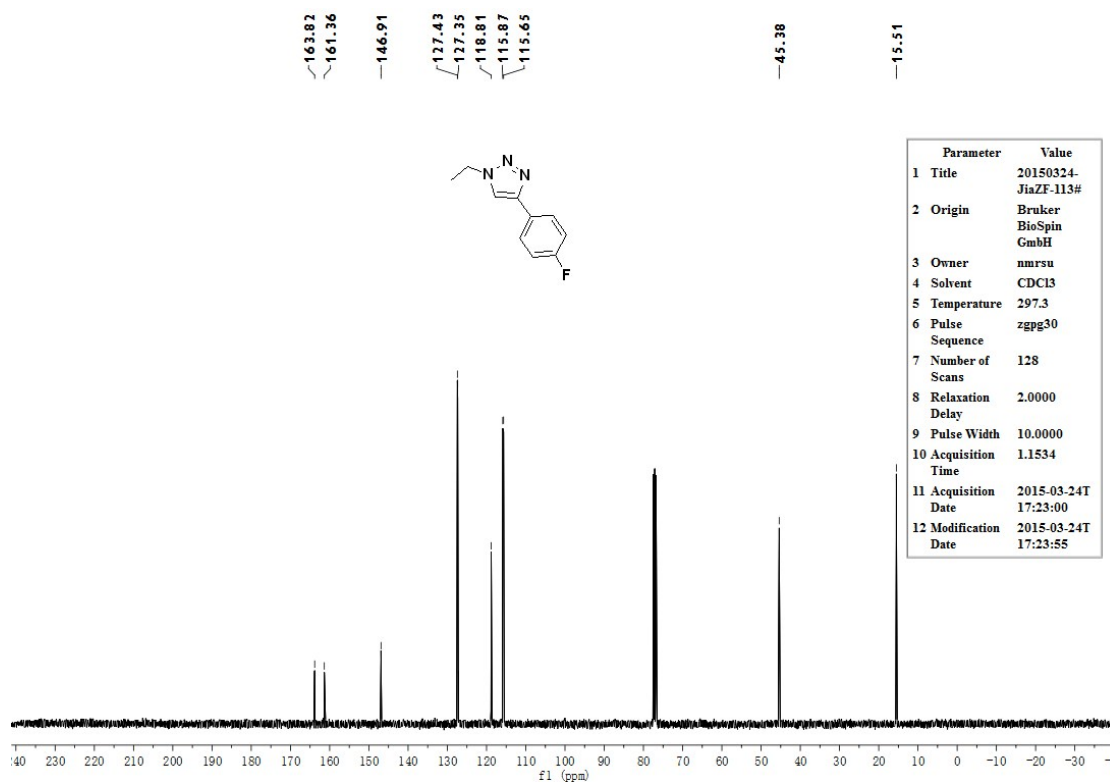

| Parameter            | Value               |
|----------------------|---------------------|
| 1 Title              | 20150324-JiaZF-113# |
| 2 Origin             | Bruker BioSpin GmbH |
| 3 Owner              | nmsru               |
| 4 Solvent            | CDCl3               |
| 5 Temperature        | 297.3               |
| 6 Pulse Sequence     | zgpg30              |
| 7 Number of Scans    | 128                 |
| 8 Relaxation Delay   | 2.0000              |
| 9 Pulse Width        | 10.0000             |
| 10 Acquisition Time  | 1.1534              |
| 11 Acquisition Date  | 2015-03-24T17:23:00 |
| 12 Modification Date | 2015-03-24T17:23:55 |

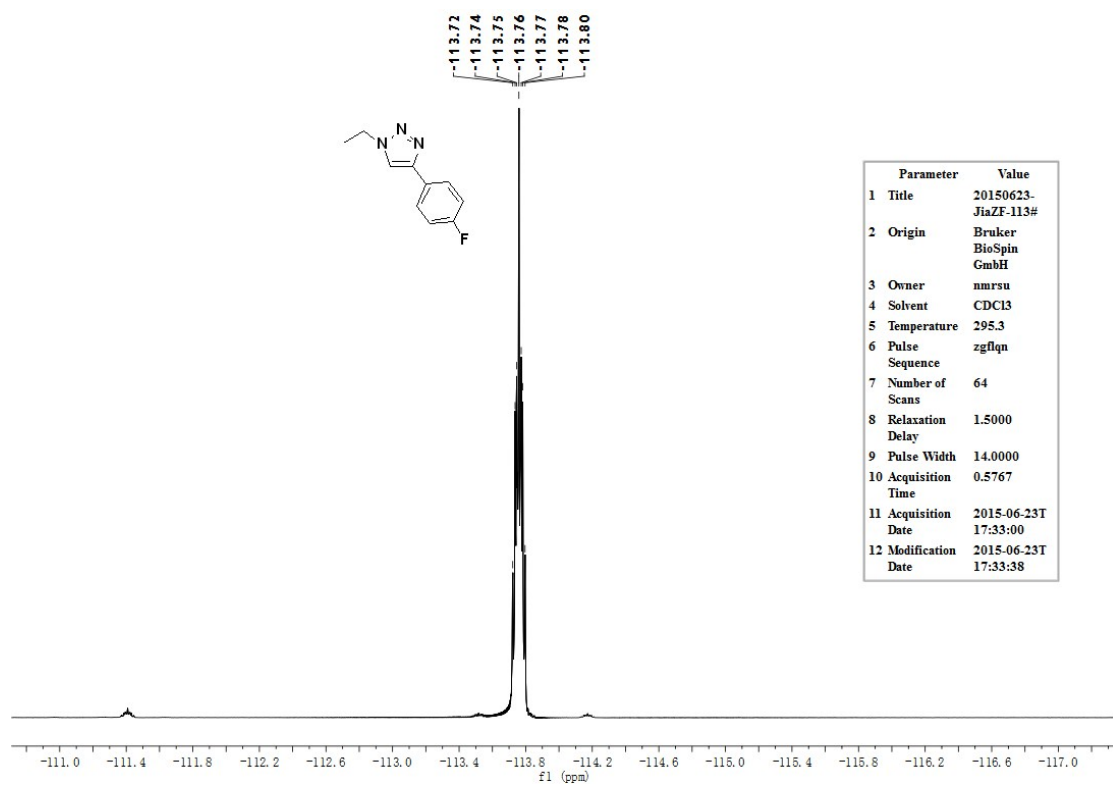

| Parameter            | Value               |
|----------------------|---------------------|
| 1 Title              | 20150623-JiaZF-113# |
| 2 Origin             | Bruker BioSpin GmbH |
| 3 Owner              | nmsru               |
| 4 Solvent            | CDCl3               |
| 5 Temperature        | 295.3               |
| 6 Pulse Sequence     | zgfgq               |
| 7 Number of Scans    | 64                  |
| 8 Relaxation Delay   | 1.5000              |
| 9 Pulse Width        | 14.0000             |
| 10 Acquisition Time  | 0.5767              |
| 11 Acquisition Date  | 2015-06-23T17:33:00 |
| 12 Modification Date | 2015-06-23T17:33:38 |

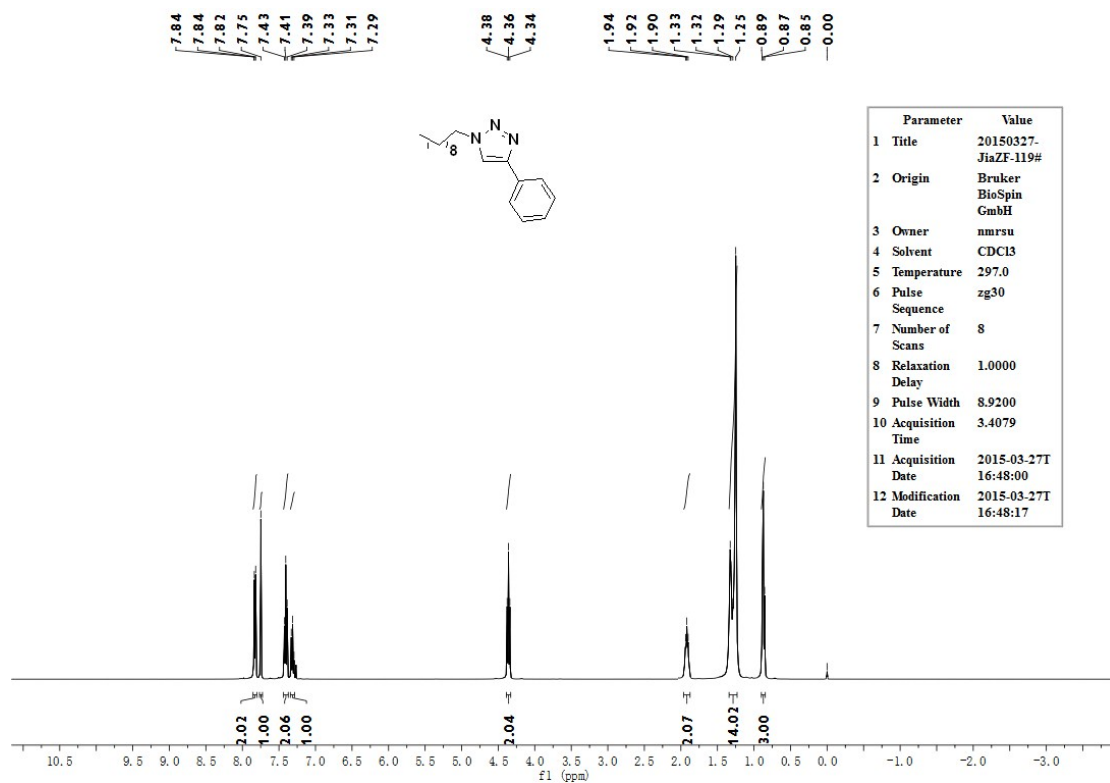

| Parameter            | Value               |
|----------------------|---------------------|
| 1 Title              | 20150327-JiaZF-119# |
| 2 Origin             | Bruker BioSpin GmbH |
| 3 Owner              | nmrsu               |
| 4 Solvent            | CDCl3               |
| 5 Temperature        | 297.0               |
| 6 Pulse Sequence     | zg30                |
| 7 Number of Scans    | 8                   |
| 8 Relaxation Delay   | 1.0000              |
| 9 Pulse Width        | 8.9200              |
| 10 Acquisition Time  | 3.4079              |
| 11 Acquisition Date  | 2015-03-27T16:48:00 |
| 12 Modification Date | 2015-03-27T16:48:17 |

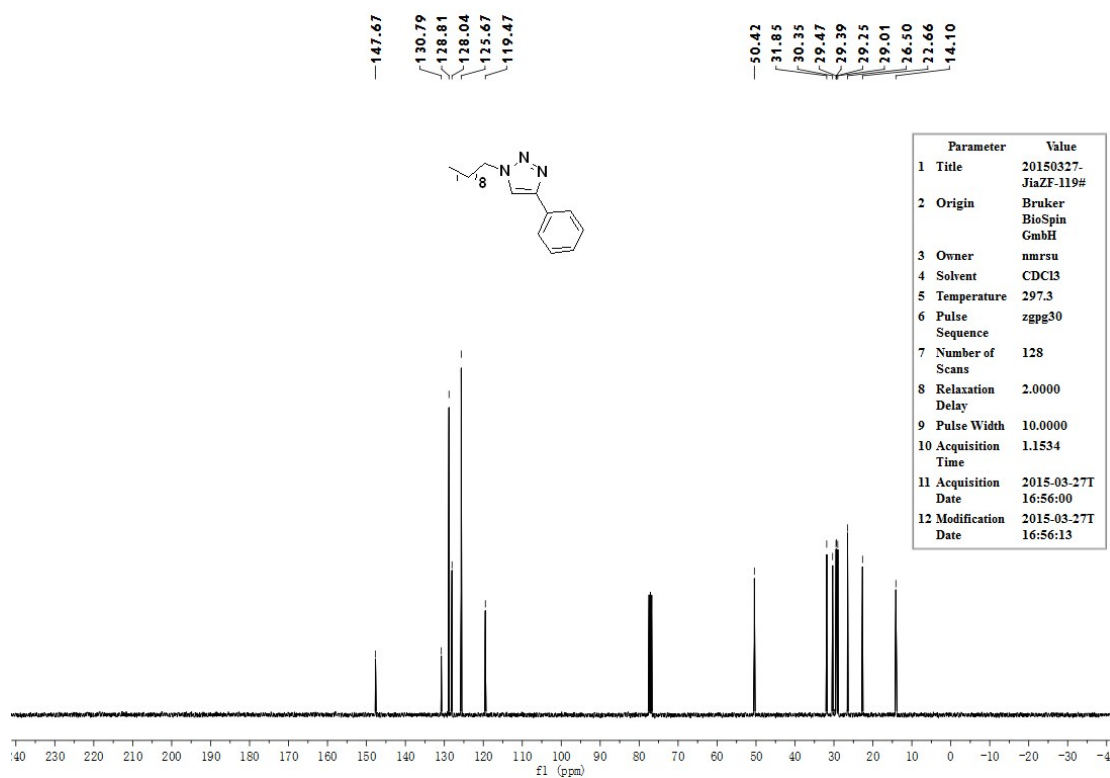

| Parameter            | Value               |
|----------------------|---------------------|
| 1 Title              | 20150327-JiaZF-119# |
| 2 Origin             | Bruker BioSpin GmbH |
| 3 Owner              | nmrsu               |
| 4 Solvent            | CDCl3               |
| 5 Temperature        | 297.3               |
| 6 Pulse Sequence     | zgpg30              |
| 7 Number of Scans    | 128                 |
| 8 Relaxation Delay   | 2.0000              |
| 9 Pulse Width        | 10.0000             |
| 10 Acquisition Time  | 1.1534              |
| 11 Acquisition Date  | 2015-03-27T16:56:00 |
| 12 Modification Date | 2015-03-27T16:56:13 |

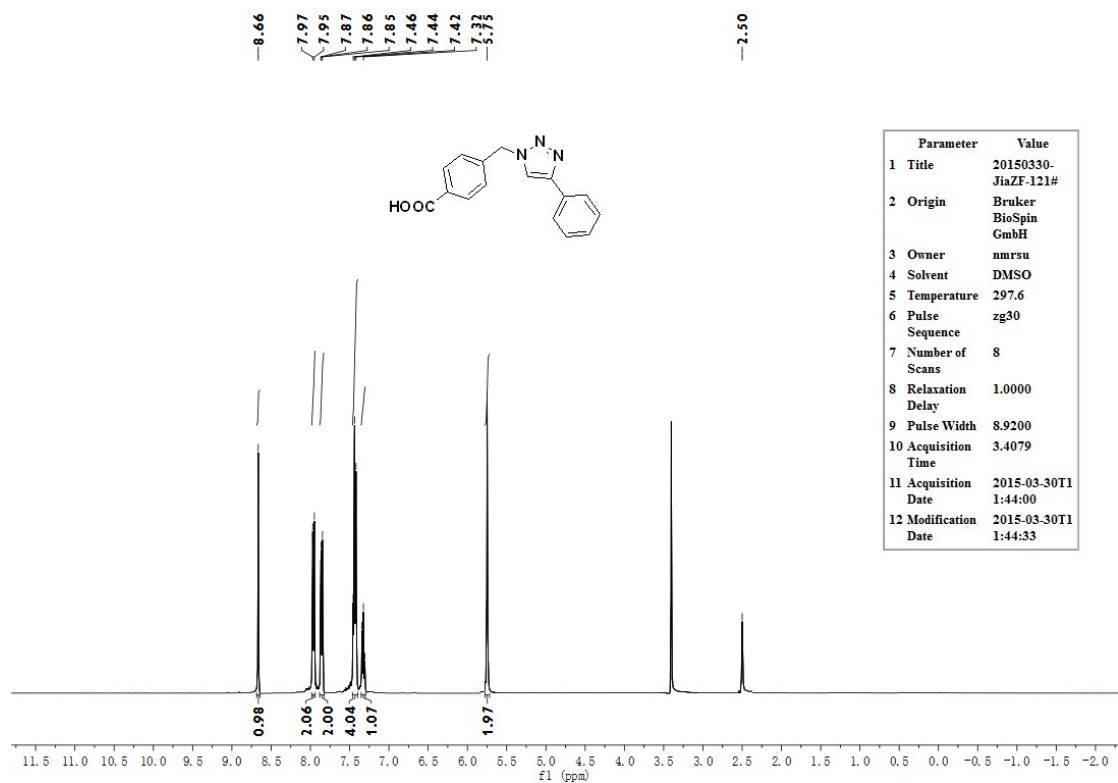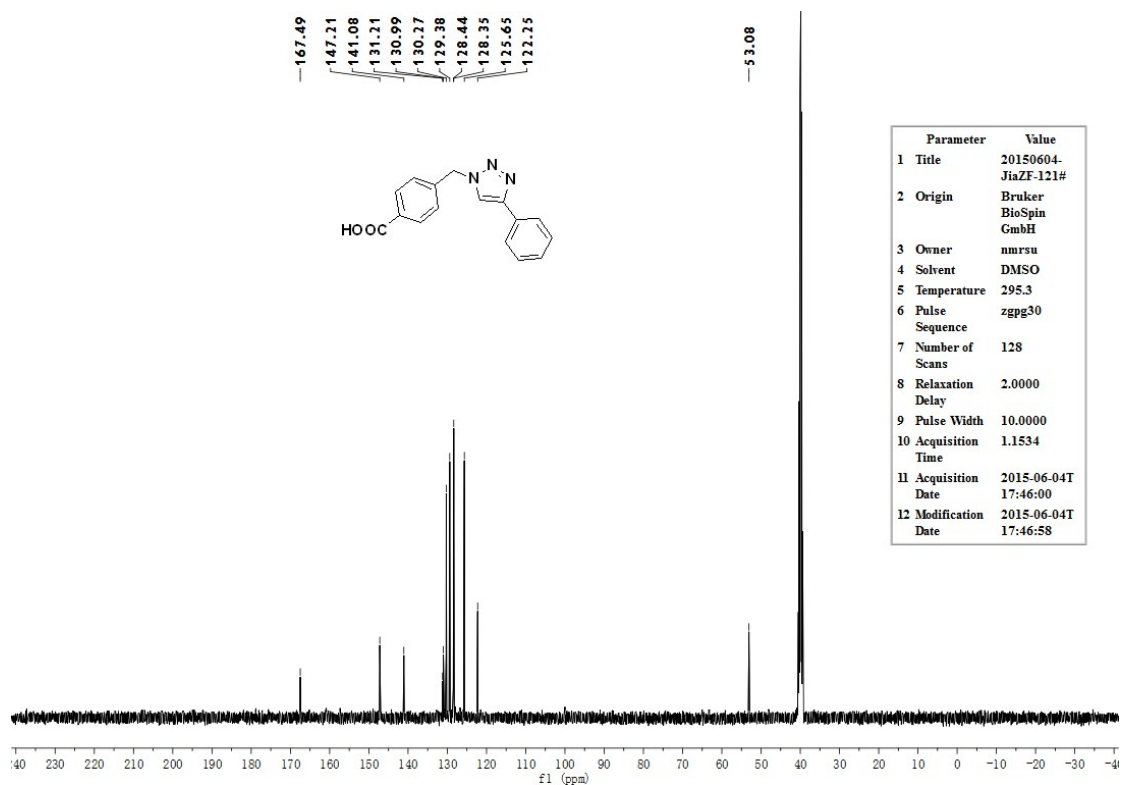



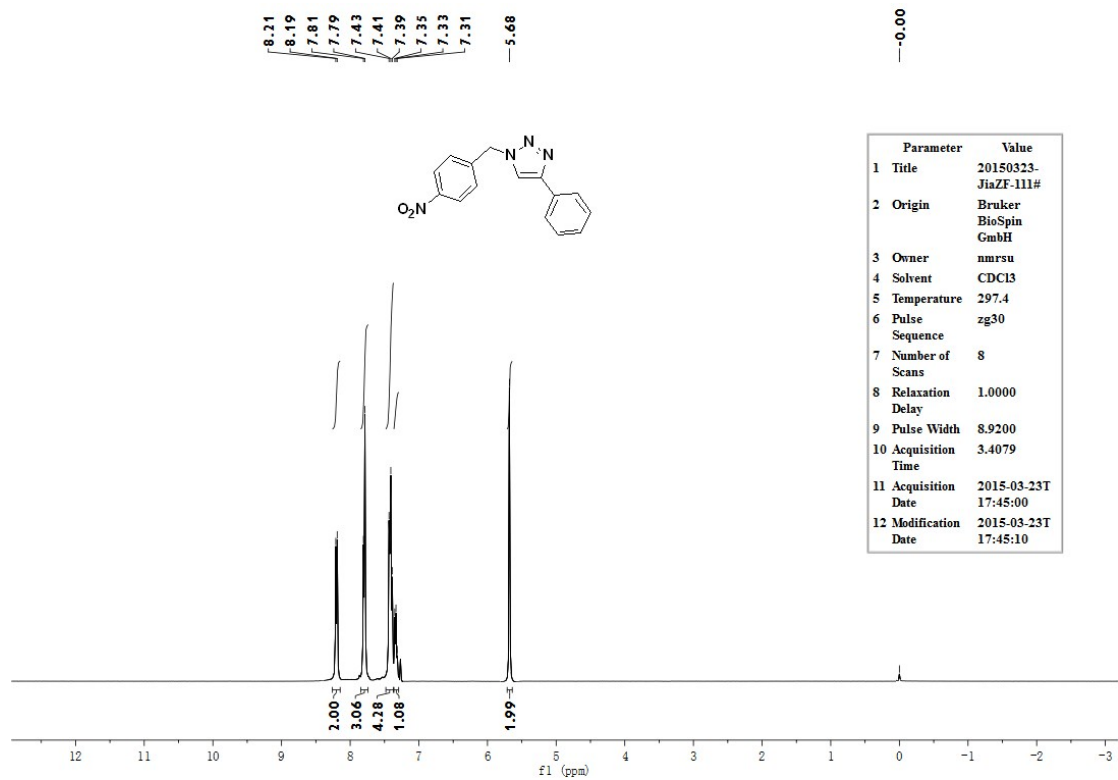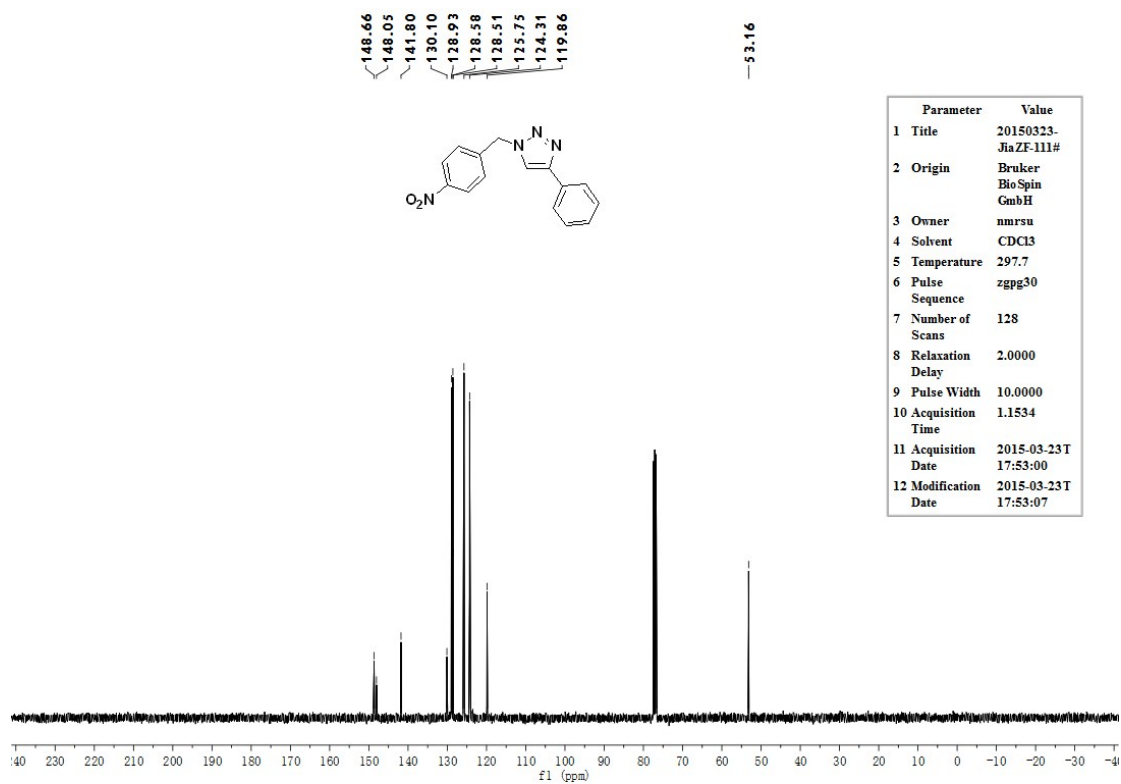

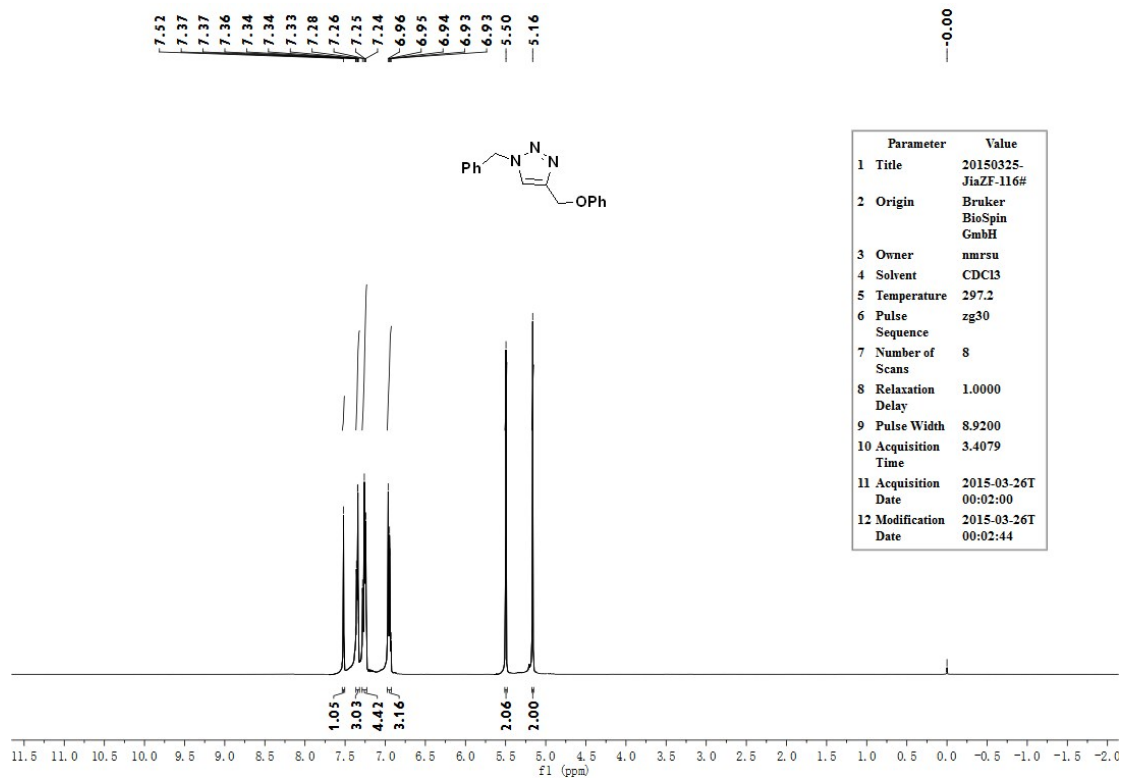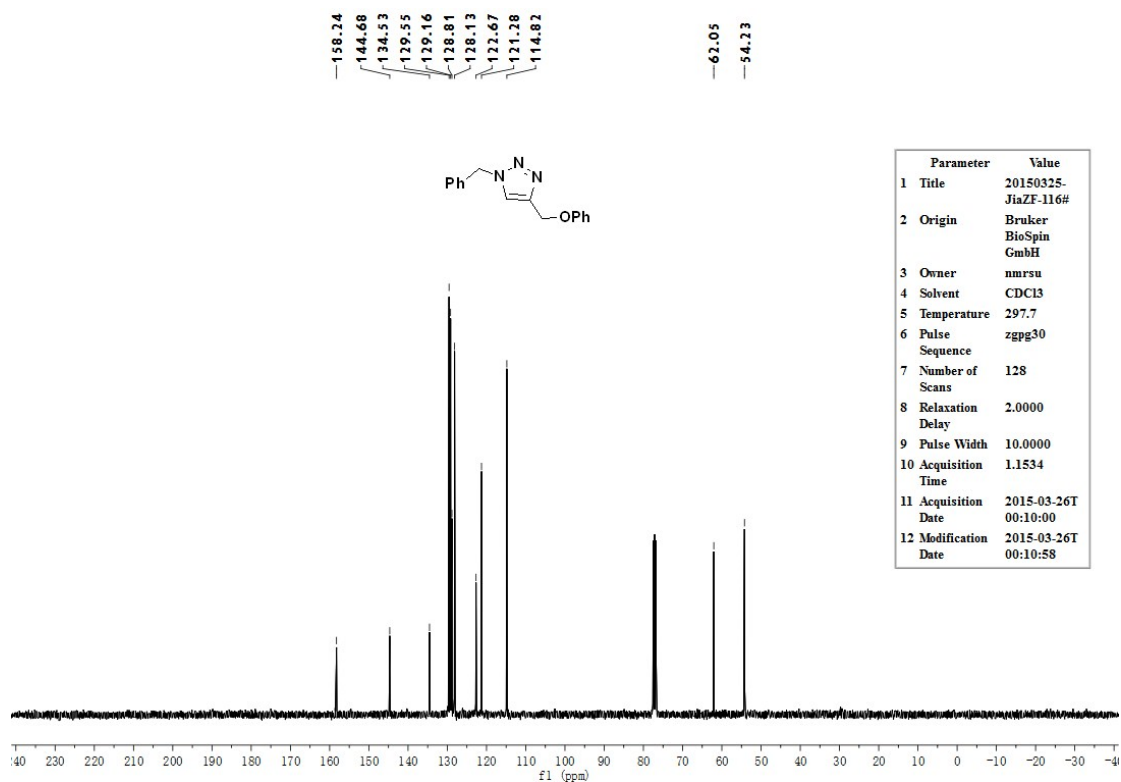

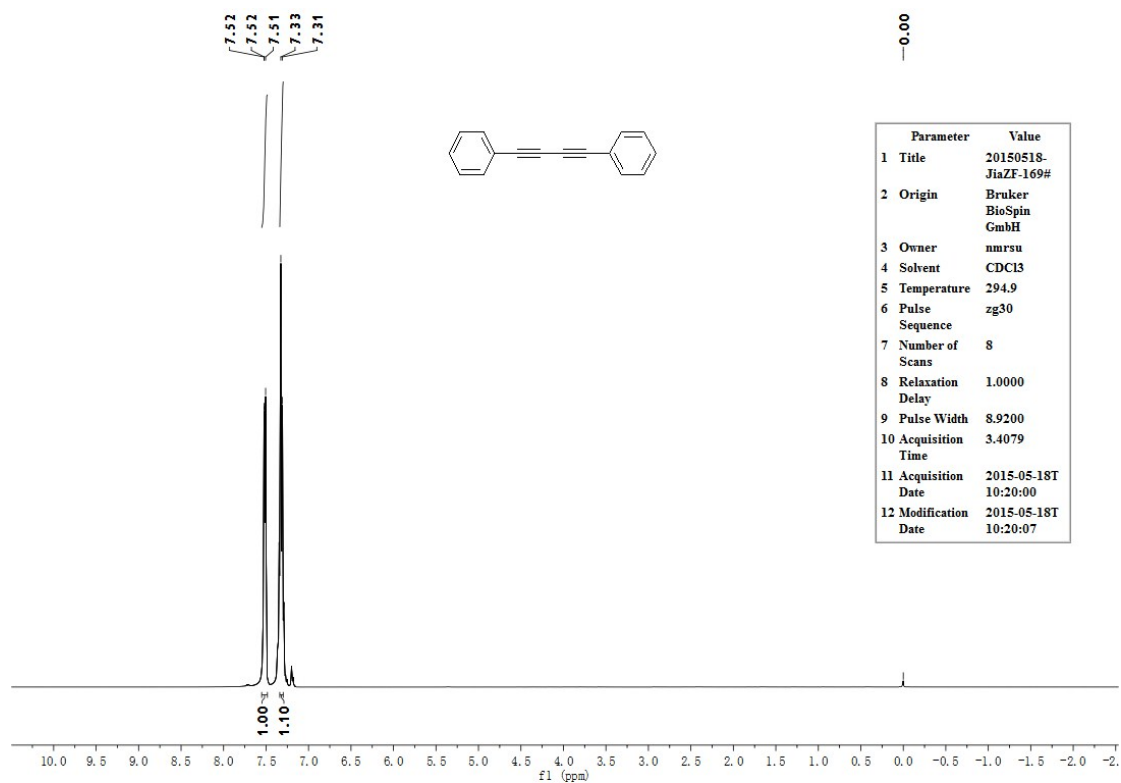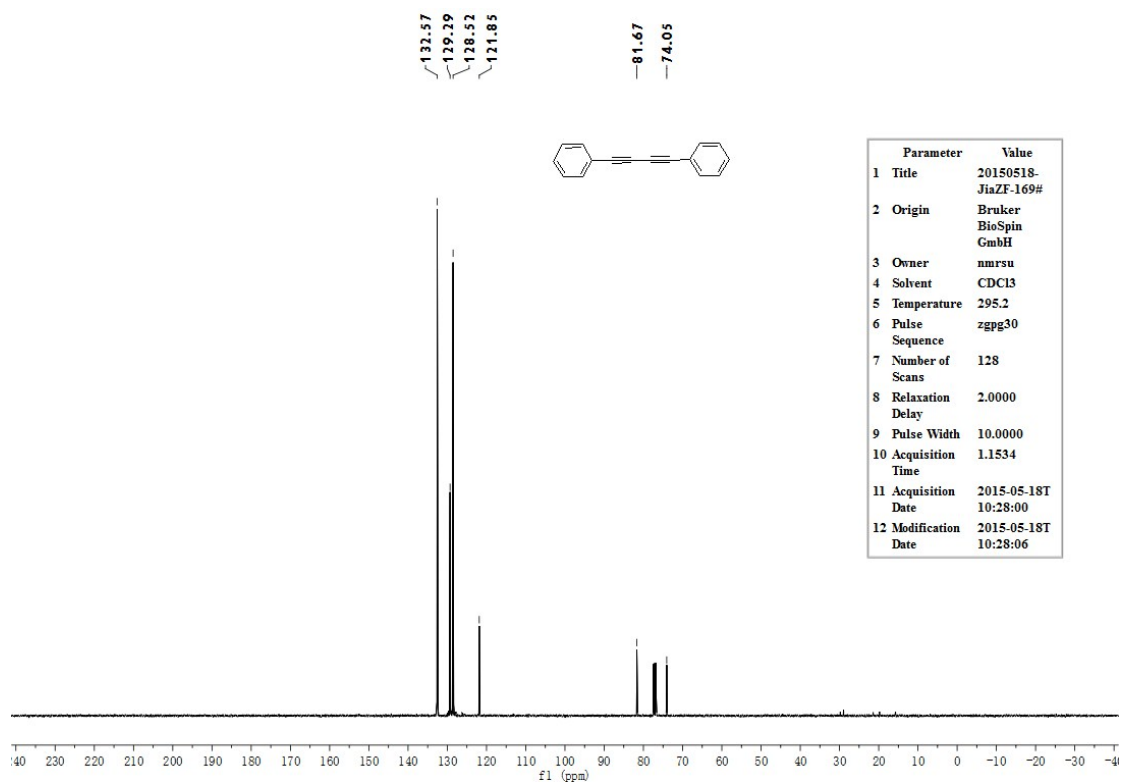

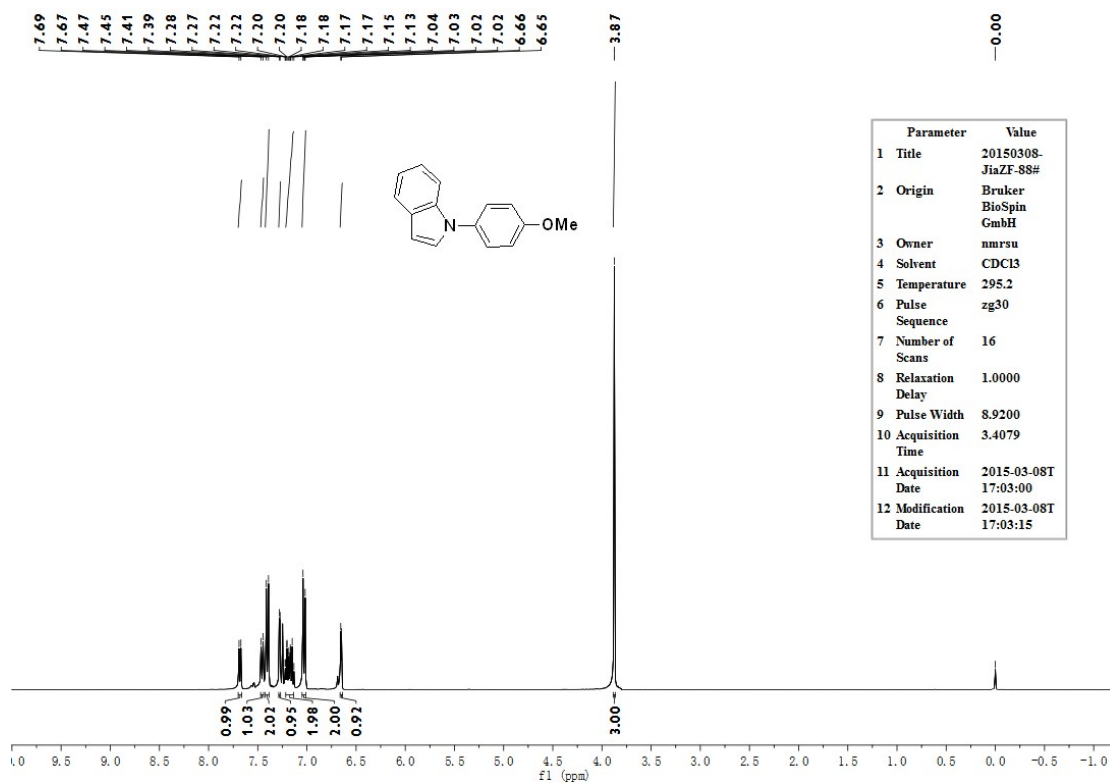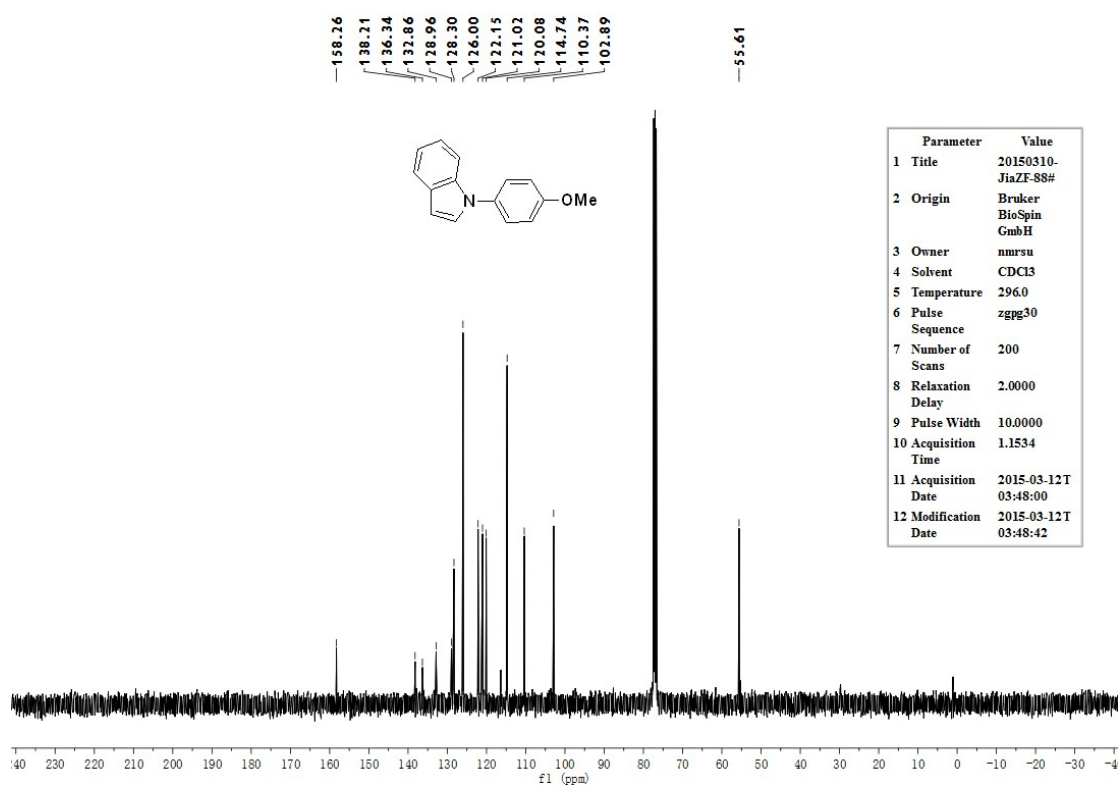

## 6. References

- 1 H. M. Lima and C. J. Lovely, *Org. Lett.*, 2011, **13**, 5736–5739.
- 2 S. Xu, K. Song, Tao Li and B. Tan, *J. Mater. Chem. A*, 2015, **3**, 1272–1278.
- 3 W. Zhang, X. He, B. Ren, Y. Jiang and Z. Hu, *Tetrahedron Lett.*, 2015, **56**, 2472–2475.
- 4 S. Saha, M. Kaur and J. K. Bera, *Organometallics*, 2015, **34**, 3047–3054.
- 5 S. Sun, R. Bai and Y. Gu, *Chem. Eur. J.*, 2014, **20**, 549–558.

- 6 H. D. Velázquez, Y. R. García, M. Vandichel, A. Madderc and F. Verpoort, *Org. Biomol.Chem.*, 2014, **12**, 9350–9356.
- 7 B. J. Borah, D. Dutta, P. P. Saikia, N. C. Baruah and D. K. Dutta, *Green Chem.*, 2011, **13**, 3453–3460.
- 8 M. Wrobel, J. Aubé and B. König, *J. Org. Chem.*, 2012, **8**, 1027–1036.
- 9 P. E. Maligres, S. W. Krska and P. G. Dormer, *J. Org. Chem.*, 2012, **77**, 7646–7651.
